## **STAG proteins promote cohesin ring loading at R-loops.**

Hayley Porter<sup>1+</sup>, Yang Li<sup>1+</sup>, Wazeer Varsally<sup>1</sup>, Maria Victoria Neguembor<sup>2</sup>, Manuel Beltran<sup>3</sup>, Dubravka Pezic<sup>1</sup>, Laura Martin<sup>2</sup>, Manuel Tavares Cornejo<sup>3</sup>, Amandeep Bhamra<sup>4</sup>, Silvia Surinova<sup>4</sup>, Richard G. Jenner<sup>3</sup>, Maria Pia Cosma<sup>2,5,6</sup>, Suzana Hadjur<sup>1\*</sup>

1 Research Department of Cancer Biology, Cancer Institute, University College London, 72 Huntley Street, London, United Kingdom

2 Centre for Genomic Regulation (CRG), The Barcelona Institute of Science and Technology, 08003 Barcelona, Spain.

3 Regulatory Genomics Group, Cancer Institute, University College London, London WC1E 6BT, United Kingdom

4 Proteomics Research Translational Technology Platform, Cancer Institute, University College London, 72 Huntley Street, London, United Kingdom

5 Universitat Pompeu Fabra (UPF), Dr Aiguader 88, 08003 Barcelona, Spain

6 Institució Catalana de Recerca i Estudis Avançats (ICREA), Pg. Lluís Companys 23, 08010 Barcelona, Spain.

+ These authors contributed equally

\* Correspondence: [s.hadjur@ucl.ac.uk](mailto:s.hadjur@ucl.ac.uk)

1 **ABSTRACT**

2

3 Most studies of cohesin function consider the Stromalin Antigen (STAG/SA) proteins  
4 as core complex members given their ubiquitous interaction with the cohesin ring.  
5 Here, we provide functional data to support the notion that the SA subunit is not a  
6 mere passenger in this structure, but instead plays a key role in cohesins localization  
7 to diverse biological processes and promotes loading of the complex at these sites.  
8 We show that in cells acutely depleted for RAD21, SA proteins remain bound to  
9 chromatin and interact with CTCF, as well as a wide range of RNA binding proteins  
10 involved in multiple RNA processing mechanisms. Accordingly, SA proteins interact  
11 with RNA and are localised to endogenous R-loops where they act to suppress R-loop  
12 formation. Our results place SA proteins on chromatin upstream of the cohesin  
13 complex and reveal a role for SA in cohesin loading at R-loops which is independent  
14 of NIPBL, the canonical cohesin loader. We propose that SA takes advantage of this  
15 structural R-loop platform to link cohesin loading and chromatin structure with diverse  
16 genome functions. Since SA proteins are pan-cancer targets, and R-loops play an  
17 increasingly prevalent role in cancer biology, our results have important implications  
18 for the mechanistic understanding of SA proteins in cancer and disease.

19

20

21

22

23 **KEY WORDS**

24 Cohesin, STAG proteins, R-loops, genome.

## 25 INTRODUCTION

26 Cohesin complexes are master regulators of chromosome structure in interphase and  
27 mitosis. Accordingly, mutations of cohesin subunits leads to changes in cellular  
28 identity, both during development and aberrantly in cancer<sup>1-3</sup>. A prevailing model is  
29 that cohesin contributes to cell identity changes in large part by dynamically regulating  
30 genome organization and mediating communication between distal regulatory  
31 elements<sup>4-10</sup>. Our understanding of how cohesin's component parts contribute to its  
32 functions and where cohesin becomes associated to chromatin in order to perform its  
33 critical roles in spatial genome organization is incomplete.

34 Most studies of cohesin function consider the Stromalin Antigen (STAG/SA)  
35 proteins as core complex members given their ubiquitous interaction with the tripartite  
36 cohesin ring (composed of SMC1, SMC3 and SCC1/RAD21). Rarely is the SA subunit  
37 considered for its roles outside of cohesin, even though it is the subunit most  
38 commonly mutated across a wide spectrum of cancers<sup>1,11,12</sup>. SA proteins play a role  
39 in cohesin's association with DNA<sup>13,14</sup>. The yeast SA orthologue is critical for efficient  
40 association of cohesin with DNA and its ATPase activation<sup>13,14</sup>. Recent crystallization  
41 studies of cohesin in complex with its canonical loader NIPBL<sup>15</sup>, suggest that NIPBL  
42 and SA together wrap around both the cohesin ring and DNA to position and entrap  
43 DNA<sup>16-18</sup>, implying a role for SA in the initial recruitment of cohesin to DNA alongside  
44 NIPBL. Further, SA proteins bridge the interaction between cohesin and CTCF<sup>16,19,20</sup>,  
45 and also bridge interactions with specific nucleic acid structures *in vitro*. SA1 binds to  
46 AT-rich telomeric sequences<sup>21,22</sup> and SA2 displays sequence-independent affinity for  
47 particular DNA structures commonly found at sites of repair, recombination, and  
48 replication<sup>23</sup>. Consistent with this, results in yeast implicate non-canonical DNA  
49 structures in cohesin loading in S-phase. *In vitro* experiments show that cohesin  
50 captures the second strand of DNA via a single-strand intermediate<sup>24</sup>, and chromatid  
51 cohesion is impaired by de-stabilisation of single-strand DNA intermediates during  
52 replication<sup>25</sup>. Together, this implicates SA proteins in playing a regulatory role in  
53 guiding or stabilising cohesin localisations.

54 During transcription, the elongating nascent RNA can hybridise to the template  
55 strand of the upstream DNA and form an R-loop, which is an intermediate RNA:DNA  
56 hybrid conformation with a displaced single strand of DNA (Richardson, 1975; Roy

57 and Lieber, 2009; El Hage *et al.*, 2010; Roy *et al.*, 2010). A multitude of processes  
58 have been linked to R-loop stability and metabolism. For example, proper co-  
59 transcriptional RNA processing, splicing, and messenger ribonucleoprotein (mRNP)  
60 assembly counteract R-loop formation (Li and Manley, 2005; Teloni *et al.*, 2019). R-  
61 loop structures have also been shown to regulate transcription of both mRNA and  
62 rRNAs by recruitment of transcription factors, displacement of nucleosomes, and  
63 preservation of open chromatin (Dunn and Griffith, 1980; Powell *et al.*, 2013; Boque-  
64 Sastre *et al.*, 2015). Hence, like at the replication fork, sites of active transcription  
65 accumulate non-canonical nucleic acid structures.

66 We set out to investigate the nature of the association between SA proteins and  
67 CTCF. We discovered that far from being ‘passengers’ in the cohesin complex, SA  
68 proteins perform critical roles in their own right, directing cohesin’s localization and  
69 loading to chromatin. In cells acutely depleted of RAD21, SA proteins remain  
70 associated with chromatin and CTCF where they are enriched at 3D clustered sites of  
71 active chromatin. Moreover, we identify cohesin-independent binding of SA1 to  
72 numerous proteins involved in RNA processing, ribosome biogenesis, and translation.  
73 Consistent with this, SA1 and SA2 interact with RNA and non-canonical nucleic acid  
74 structures in the form of R-loops where SA1 acts to suppress R-loop formation.  
75 Importantly, SA proteins are required for loading of cohesin to chromatin in cells  
76 deficient for NIPBL, and loading is enhanced by modulating the levels of R-loop  
77 structures. Our results highlight a central role for SA proteins in cohesin biology.  
78 Through their diverse interactions with proteins, RNA and DNA, SA proteins act as the  
79 ‘seed’ for cohesin loading to chromatin. Finally, the interaction of cohesin-independent  
80 SA proteins with nucleolar and RNA processing factors, opens up a new  
81 understanding of how cohesin mis-regulation can impact disease development that  
82 moves us beyond its control of gene expression regulation.



## 83 RESULTS

84

### 85 SA interacts with CTCF on chromatin in the absence of the cohesin trimer.

86 To determine how CTCF and cohesin assemble on chromatin, we used human  
87 HCT116 cells engineered to carry a miniAID tag (mAID) fused to monomeric Clover  
88 (mClover) at the endogenous Rad21 locus and *OsTIR1* under the control of CMV  
89 (herein RAD21<sup>mAC</sup>)<sup>26</sup>. RAD21<sup>mAC</sup> cells were cultured in control conditions (ethanol) or  
90 in the presence of auxin (IAA) to induce rapid RAD21 degradation. We used  
91 immunofluorescence (IF) to monitor the levels of mClover, SA1, SA2 and CTCF  
92 (Fig.1a, b, S1a). While acute IAA treatment robustly reduced mClover levels by over  
93 83% compared to control cells, SA2 levels were reduced by 63% ( $p=4.7E-76$ ), and  
94 SA1 was only reduced by 29% ( $p=7.9E-12$ ) (Fig.1b). We also observed a variable  
95 effect on CTCF in the absence of RAD21 (reduced mean value between 7-24%). The  
96 retention of SA proteins on chromatin despite the degradation of RAD21 was  
97 surprising given the fact that they are considered to be part of a stable biochemical  
98 complex.

99 We sought to validate these observations using an orthogonal technique and  
100 to establish whether the residual SA proteins retained the capacity to directly interact  
101 with CTCF. We prepared chromatin extracts from RAD21<sup>mAC</sup> cells treated with ethanol  
102 or IAA and established a chromatin co-immunoprecipitation (coIP) protocol to probe  
103 the interactions between SA proteins, cohesin core subunits and CTCF. Both SA1  
104 and SA2 interacted with RAD21 and CTCF in control cells as expected<sup>27,28</sup>, with  
105 notable differences in their preferred interactions (Fig.1c). SA2 more strongly enriched  
106 RAD21 while the SA1-CTCF interaction was significantly stronger than SA2-CTCF  
107 (Fig.1c). Upon RAD21 degradation, we again observed a stronger effect on chromatin-  
108 bound SA2 levels compared to SA1, implying stable binding of SA2 to chromatin is  
109 more sensitive to cohesin loss than SA1. Not only did the residual SA proteins retain  
110 their ability to interact with CTCF in the absence of Rad21, but the interactions  
111 between SA1 and CTCF were further enhanced (Fig.1c). Reciprocal coIPs with CTCF  
112 confirmed the CTCF-SA interactions in RAD21-depleted cells (Fig.1d). These results  
113 were validated in a second cell line and upon siRNA-mediated knockdown of SMC3,  
114 confirming the results (Fig S1b).

115 We performed two-color Stochastic Optical Reconstruction Microscopy  
116 (STORM) to further assess the nuclear distribution and colocalization of SA1, SA2 and  
117 CTCF with nanometric resolution in RAD21-degraded cells. Upon IAA treatment, we  
118 observed a decreased density of detected SA1, SA2 and CTCF in two analyzed clones  
119 (Fig.1e, f, S1c, d), suggesting that RAD21 degradation affects the stability of CTCF in  
120 addition to SA proteins. As we observed by conventional confocal microscopy, SA2  
121 localizations were more affected than SA1 (mean density reduction in SA1, 32% vs  
122 SA2, 42%). Accordingly, SA1, SA2 and CTCF clusters were more sparsely distributed  
123 across the nucleus upon RAD21 degradation as quantified by nearest neighbor  
124 distance (NND) analysis of protein clusters (Fig.1g). This analysis also revealed a  
125 higher density of SA1 and CTCF clusters compared to SA2, with shorter distances  
126 between clusters, even in ethanol conditions (Fig.1g). To further confirm that SA and  
127 CTCF were still co-localised in IAA conditions, we analyzed the relative distribution of  
128 SA clusters to CTCF clusters by analyzing the NND distribution between SA1 and  
129 CTCF, and SA2 and CTCF. NND showed that the association between SA1 and SA2  
130 with CTCF is maintained upon RAD21 degradation as compared to both the control  
131 cells and to a simulation of randomly-distributed protein clusters at the same density  
132 (Fig. 1h). Interestingly, while the probability of SA1 at CTCF is only modestly affected  
133 in IAA conditions, supporting their continued co-localization, SA2 at CTCF is more  
134 affected in IAA treated cells, in line with results indicating that SA2 levels are more  
135 affected than SA1 when cohesin is depleted. Together, our results confirm the  
136 maintained interaction and localization patterns of SA proteins with CTCF and reveal  
137 a difference in SA paralogue stability in the absence of the core cohesin trimer.

138

### 139 **Cohesin-independent SA proteins are localised at clustered regions in 3D.**

140 Previous analyses of the contribution of SA proteins to genome organization<sup>7,9</sup> were  
141 performed in cells containing cohesin rings, possibly obscuring a functional role for SA  
142 proteins themselves in genome organization. To determine if cohesin-independent SA  
143 proteins may function at unique locations in the genome, we investigated whether the  
144 residual SA-CTCF complexes (herein, SA-CTCF<sup>ΔCoh</sup>) in IAA-treated RAD21<sup>mAC</sup> cells  
145 (Fig.1c, d) occupied the same chromatin locations as in control cells. Using chromatin  
146 immunoprecipitation followed by sequencing (ChIP-seq), we determined the binding

147 profiles of CTCF, SA1, SA2, RAD21 and SMC3 in RAD21<sup>mAC</sup> cells treated with ethanol  
148 or IAA. Pairwise comparisons of CTCF ChIP-seq with RAD21 or SA in control  
149 RAD21<sup>mAC</sup> cells revealed the expected overlap in binding sites (Fig.1i, S1e). In  
150 contrast, both global and CTCF-overlapping RAD21 and SMC3 ChIP-seq signals were  
151 dramatically lost in IAA-treated cells (Fig.1i, S1e). In agreement with our microscopy  
152 and biochemistry results, we detected residual SA1 and SA2 binding sites in IAA-  
153 treated cells which retained a substantial overlap with CTCF (Fig.1i, S1e). We  
154 confirmed that the sites co-occupied by CTCF and SA proteins in RAD21-depleted  
155 cells were previously bound in control conditions, indicating that CTCF and SA  
156 maintain occupancy at their canonical binding sites in the absence of RAD21. This  
157 suggests that SA interaction with CTCF in the absence of the cohesin ring is a step in  
158 normal cohesin activity.

159 While depletion of cohesin results in a dramatic loss of Topologically  
160 Associated Domain (TAD) structure<sup>8</sup>, the frequency of long-range inter-TAD, intra-  
161 compartment contacts (LRC) is increased<sup>5,8</sup>, and enriched for CTCF<sup>5</sup> or active  
162 enhancers<sup>8</sup>. To determine whether residual, chromatin-bound SA could be associated  
163 with LRCs in the absence of RAD21, we re-analysed Hi-C data from control and IAA-  
164 treated RAD21<sup>mAC</sup> cells<sup>8</sup>. We quantified all contacts within two different scales of  
165 genome organization; local TAD topology (100k-1Mb) and clustered LRCs (1-5Mb)  
166 (Fig.1j). As previously shown, local TAD contacts are lost and clustered LRCs are  
167 enriched in IAA conditions (Fig.1j). When we probed the Hi-C datasets for contacts  
168 containing the residual SA-CTCF<sup>ΔCoh</sup> binding sites, we observed a further enrichment  
169 in IAA conditions (Fig.1j, bottom row), indicating that SA-CTCF<sup>ΔCoh</sup> are enriched at the  
170 clustered LRCs formed when cells are depleted of cohesin and thus implicating them  
171 in 3D structural configurations. Finally, using ChromHMM, we discovered that SA-  
172 CTCF<sup>ΔCoh</sup> sites are characterised by active chromatin and enhancers (Fig.S1f). Our  
173 results suggest that cohesin-independent SA, either with CTCF or alone, may itself  
174 contribute to large-scale arrangement of active chromatin and regulatory features in  
175 3D space.

176

177

178

179 **SA interacts with diverse ‘CES-binding proteins’ in RAD21-depleted cells.**

180 SA proteins contain a highly conserved domain termed the ‘stromalin conservative  
181 domain’<sup>14,29</sup>, or the ‘conserved essential surface’ (CES). Structural analysis of CTCF-  
182 SA2-SCC1(RAD21) has recently shown that FGF (F/YxF) motifs in the N-terminus of  
183 CTCF bind to the CES on the SA2-SCC1 sub-complex, forming a tripartite interaction  
184 patch<sup>16</sup>. Furthermore, the authors identified an FGF-like motif in additional cohesin  
185 regulators and showed that a consensus motif could be used to predict interaction with  
186 additional chromatin proteins. Thus, we investigated whether SA could associate with  
187 other FGF-motif containing proteins in native and IAA conditions in cells. We  
188 performed chromatin IP with SA1 and SA2 in ethanol and IAA and probed for  
189 interaction with CTCF, and three additional FGF-motif containing proteins, CHD6,  
190 MCM3 and HNRNPUL2 (Fig.2a, S2a). As with CTCF, all of the proteins directly  
191 interacted with SA1 in RAD21-control cells and furthermore their interaction with SA1  
192 was enriched upon RAD21-degradation. Interestingly, despite SA2 also containing the  
193 conserved ‘CES’ domain, the FGF-motif proteins did not interact with SA2 as strongly  
194 (Fig.2a), pointing to an additional element which functions to stabilise SA with FGF-  
195 containing proteins *in vivo*. These results revealed that SA can interact with proteins  
196 beyond just CTCF in the absence of cohesin, indicating a need to re-evaluate the role  
197 of SA in cohesin activity and consider possible novel functions for SA proteins.

198

199 **SA1 interacts with a diverse group of proteins in the absence of cohesin.**

200 To delineate novel protein binding partners and putative biological functions of SA1,  
201 we optimised our chromatin-bound, endogenous SA1 co-IP protocol to be compatible  
202 with mass-spectrometry (IP-MS) and used this to comprehensively characterize the  
203 SA1 protein–protein interaction (PPI) network in control or RAD21-degraded  
204 RAD21<sup>mAC</sup> cells. Three biological replicate sets were prepared from RAD21<sup>mAC</sup> cells  
205 that were either untreated (UT) or treated with IAA (IAA) and processed for IP with  
206 both SA1 and IgG antibodies. In parallel, RAD21<sup>mAC</sup> cells were also treated with  
207 scrambled siRNAs or with siRNA to SA1 to confirm the specificity of putative  
208 interactors (Fig. S2b). Immunoprecipitated proteins were in-gel Trypsin digested, gel  
209 extracted, and identified by liquid chromatography tandem mass spectroscopy (LC-

210 MS/MS). SA1 peptides were robustly detected in all UT and siCON samples and never  
211 detected in IgG controls, validating the specificity of the antibody.

212 We identified 1282 unique proteins that co-purified with SA1 with a False  
213 Discovery Rate <1%. After filtering steps (methods), we used a pairwise analysis of  
214 IAA vs UT samples to generate a fold-change value for each putative interactor. These  
215 candidates were found in at least 2 of the 3 SA1 IP replicates, were changed by at  
216 least 1.5-fold compared to UT controls, and sensitive to siSA1, yielding 134 high-  
217 confidence cohesin-independent SA1 (SA1<sup>ΔCoh</sup>) interactors (Fig. 2b, Table 1). As  
218 expected, core cohesin subunits SMC1A and SMC3 were strongly depleted while no  
219 peptides were detected for RAD21 (Fig. 2b). SA1 itself was significantly depleted  
220 compared to control cells, as were other cohesin regulators, known to directly interact  
221 with SA1, such as PDS5B<sup>30</sup>. In line with the enrichment we observed for the CES-  
222 binding proteins in IAA-conditions (Fig. 1c, 2a), the vast majority of the SA1<sup>ΔCoh</sup>  
223 interactors were enriched for binding with SA1 in IAA conditions (117 of 134) (Fig. 2b).

224 We used STRING analysis to compute the associations between our SA1<sup>ΔCoh</sup>  
225 interactome and to identify enriched biological processes and molecular functions.  
226 This revealed that the SA1<sup>ΔCoh</sup> PPI network included gene expression, chromatin,  
227 cytoplasmic and RNA binding proteins representing a variety of functionally diverse  
228 cellular processes. Among these are processes previously associated with cohesin  
229 biology and identified in published cohesin mass-spec experiments<sup>31</sup>, thus validating  
230 our approach, such as MCM3 and SWI/SNF components INO80 and SMARCAL1  
231 which are involved in DNA replication and chromatin remodelling, respectively.  
232 Similarly, several transcriptional and epigenetic regulators were identified, such as  
233 PRC2 component JARID2 and TAF15 and SPTY2D1.

234 In addition, we identified proteins associated with SA1 in IAA conditions that  
235 were involved in functions that have not been previously associated with SA biology  
236 (Fig. 2c, d). The most enriched category was RNA processing ( $p=3.62^{-39}$ ), and  
237 included proteins involved in RNA modification (YTHDC1, ADAR1, FTSJ3); mRNA  
238 stabilization and export (SYNCRIP, FMR1); and several RNA splicing regulators  
239 (SRSF1, SON). Accordingly, we found a significant enrichment for DNA and RNA  
240 helicases ( $p=3.54^{-08}$ ) (MCM3, DHX9, more) and RNA binding proteins ( $p=9.11^{-11}$ )

241 within which were several hnRNP family members (hnRNPU or SAF-A). We also found  
242 a highly significant enrichment of proteins associated with Ribosome biogenesis  
243 ( $p=2.20^{-30}$ ) including both large and small subunit components (RPL5, 17, 29, RPS9);  
244 rRNA processing factors (BOP1, NOP56); and components of the snoRNA pathway.  
245 Translation was significantly enriched as a biological process ( $p=1.64^{-06}$ ), with several  
246 cytoplasmic translation regulators also identified as SA1<sup>ΔCoh</sup> interactors (Fig. 2c, d).  
247 Among these are ESYT2 and EIF3B which we identify as FGF-containing proteins that  
248 are primarily found in the cytoplasm (Fig. 2d). We validated 8 of the highest-ranking  
249 proteins within the enriched functional categories described above by immunoblotting  
250 in ethanol and IAA-treated RAD21<sup>mAC</sup> cells (Fig. 2d). Overall, our results show that  
251 SA1<sup>ΔCoh</sup> PPIs contain not only for transcriptional and epigenetic regulators, but also  
252 are predominantly enriched for proteins with roles in nuclear RNA processing and  
253 modification, ribogenesis and translation pathways. Accordingly, this suggests that SA  
254 may facilitate an aspect of cohesin regulation at a variety of functionally distinct cellular  
255 locations through its association with these diverse proteins.

256

### 257 **SA proteins directly bind RNA.**

258 Since RNA binding and RNA processing were two of the most enriched categories in  
259 the SA1<sup>ΔCoh</sup> PPI network, we asked whether SA proteins could also bind RNA. We  
260 performed CLIP (crosslinking and immunoprecipitation) to determine whether SA  
261 proteins directly bind RNA in untreated RAD21<sup>mAC</sup> cells. We found that both SA1 and  
262 SA2 directly bound RNA (Fig.3a). This was evidenced by detection of RNPs of the  
263 expected molecular weights, with a smear of trimmed RNA, which was stronger in the  
264 +UV and +PNK conditions, which increased as the RNaseI concentration was reduced  
265 and which was lost after siRNA-mediated KD (Fig.3a, S3a). We repeated the  
266 experiment in IAA-treated RAD21<sup>mAC</sup> cells to determine if the SA subunits can directly  
267 bind RNA in the absence of cohesin. Although RAD21 depletion reduced SA1 and  
268 SA2 stability, the amount of RNA crosslinked to the proteins remained proportional to  
269 the amount of SA1 and SA2 protein, demonstrating that cohesin is not required for the  
270 interaction of these proteins with RNA in cells (Fig.3b, S3b). Thus, cohesin-  
271 independent SA proteins interact with a wide array of RNA binding proteins (RBP) as  
272 well as with RNA itself.



273 **A variable exon in the C-terminus of SA tunes association w RNA binding**  
274 **proteins.**

275 SA1 and SA2 express transcript variants in RAD21<sup>mAC</sup> cells. One such prominent  
276 variant arises from the alternative splicing of a single C-terminal exon, exon 31 in SA1  
277 (SA1<sup>e31Δ</sup>) and exon 32 in SA2 (SA2<sup>e32Δ</sup>) (Fig.3c). This has been observed in many cell  
278 types, however the significance of this variant is unknown. We re-analysed publicly  
279 available RNA-seq datasets for gene expression and alternative splicing. Interestingly,  
280 quantification of the splicing profiles using VAST-tools analysis<sup>32</sup> revealed that the  
281 frequency of the e31 or e32 splicing events were dramatically different (Fig.3d). The  
282 majority of SA1 mRNAs *include* e31 (average PSI 97.7%), while the majority of SA2  
283 mRNAs *exclude* e32 (average PSI 20.4%). We confirmed this at the protein level by  
284 designing custom esiRNAs to specifically target SA1 e31 or SA2 e32 (Methods).  
285 Smartpool (SP) KD reduced the levels of SA1 and SA2 to similar extents compared to  
286 scrambled controls (87% and 94% respectively compared to siRNA control) (Fig. 3e,  
287 f). Specific targeting of SA1 e31 led to a reduction of 85% of SA1 compared to esiRNA  
288 control (Fig.3e), while SA2 e32 targeting had a minimal effect on SA2 protein levels  
289 compared to its esiRNA control (reduction of 2%) (Fig.3f), in line with the PSI data.

290 These results imply that cells 'tune' the availability of e31/32 domains in SA  
291 proteins, prompting us to investigate the nature of these exons to shed light on their  
292 potential function. Inspection of the amino acid (aa) sequence of the spliced exons  
293 revealed that they encode a highly basic domain within an otherwise acidic C-terminus  
294 (Fig.3c). Overall, the SA paralogs are highly homologous, however the N and C termini  
295 diverge in their aa sequence. Despite this divergence, e31 and e32 have retained their  
296 basic properties with a pI similar to histones (pI=10.4, 9.9 for e31 and e32,  
297 respectively) (Fig.3c). Basic domains act as important regulatory cassettes and can  
298 bind nucleic acids. Thus, we investigated whether the alternatively spliced basic exon  
299 of SA proteins contributes to the differential association of SA with RNA (Fig.3a,b).  
300 We cloned cDNAs from HCT116 cells representing full-length SA2 (SA2<sup>FL</sup>) and the  
301 variant lacking e32 (SA2<sup>e32Δ</sup>), tagged them with YFP and expressed them in HCT cells  
302 (Fig.S3c). We used the GFP-TRAP system to specifically purify the YFP-tagged  
303 isoforms from cells and compared their ability to interact with RNA. While CLIP  
304 experiments revealed that the presence of the alternative e32 does not affect the  
305 ability of SA2 to interact with RNA (Fig.3g, S3d), however it did reveal bands which

306 were enriched in the YFP-SA2<sup>FL</sup> CLIP and not observed in the YFP-SA2<sup>e32Δ</sup> samples,  
307 revealing a role for the alternative exon in enhanced association of SA2 with RNA  
308 binding proteins.

309

### 310 **SA proteins bind to endogenous R-loops.**

311 Regulators of RNA processing, such as splicing, modification and export factors, act  
312 as regulators of R-loops<sup>33</sup>. In addition, R-loops are found at sites of multiple biological  
313 processes including transcription (of both mRNAs and rRNA), DNA replication and  
314 DNA repair<sup>33</sup>. Given the fact that many of these processes were enriched in the SA1  
315 interactome and our observations that SA proteins can interact with RNA, we reasoned  
316 that the diversity of biological processes represented in the SA1<sup>ΔCoh</sup> PPI network may  
317 be reflective of a role for SA proteins in R-loop biology.

318 To address this, we returned to our IP-MS experiment to analyse enrichment of  
319 R-loop-associated proteins in our SA1<sup>ΔCoh</sup> interactome. We overlapped the proteins  
320 identified in two independent IP-MS experiments using the R-loop specific antibody,  
321 S9.6<sup>34,35</sup> to create a custom high-confidence 'R-loop interactome' and then used a  
322 hygrometric distribution to determine the significance of this category in the SA1<sup>ΔCoh</sup>  
323 interactome (methods). Both the custom R-loop interactome as well as the S9.6  
324 interactomes from Cristini et al., and Wang et al., were highly over-enriched in the  
325 SA1<sup>ΔCoh</sup> interactome (FDR=1.10x10<sup>-15</sup>, 1.38x10<sup>-47</sup>, respectively) (Fig.4a). As an  
326 independent validation of these observations, we optimised an S9.6 coIP method in  
327 RAD21<sup>mAC</sup> cells (Fig.4b, methods). In agreement with published results, we found that  
328 S9.6 precipitated with the known R-loop helicases AQR, DHX9, RNase H2<sup>34,36</sup> as well  
329 as MCM3 and RNA Pol II<sup>37</sup>. Both SA1 and SA2 precipitated with S9.6 (Fig.4b, S3x),  
330 indicating a function at R-loops and supporting the observed enrichment of R-loop  
331 proteins in the SA1 interactome.

332 To understand the causal relationship between R-loops and SA proteins, and  
333 to determine the specificity of S9.6-SA interactions, we used RNase H1 to selectively  
334 degrade the RNA component of RNA:DNA hybrids<sup>38</sup>. We were able to achieve a  
335 ~30% reduction in R-loops upon treatment of chromatin lysates with RNase H (Fig.4b,  
336 S4a). This reduction was proportional to the observed reduction in coIP of SA1 by  
337 S9.6 (Fig.4b, S4b). In parallel, we assessed the effect of R-loop degradation on



338 chromatin-bound SA levels in single cells using confocal microscopy. Treatment of  
339 RAD21<sup>mAC</sup> cells with RNase H1 reduces S9.6 staining by >50% of untreated controls  
340 (Fig.4c, d). In agreement with the S9.6 colIP results, mean levels of SA1 and SA2 were  
341 significantly reduced by 35% and 18.5%, respectively compared to control cells in  
342 response to RNase H treatment (Fig. 4c, d). Finally, we also depleted R-loops *in vivo*  
343 by overexpressing ppyCAG-v5-RNaseH1 in cells. IF revealed that nuclear S9.6 levels  
344 were significantly reduced in cells which expressed v5 (to 38% of controls) and that  
345 mean levels of chromatin-associated SA1 were similarly reduced by 29.4% (p=4.05E-  
346 8) (Fig.S4c), further confirming the causal relationship between R-loops and SA  
347 proteins.

348

### 349 **SA1 proteins act as suppressors of R-loops.**

350 Proteins that act to suppress R-loops *in vivo*, such as AQR<sup>36</sup>, have an inverse  
351 correlation with S9.6 levels. From our IF results (Fig. 4c, d), we noticed that SA1 had  
352 a similar negative relationship with S9.6 (Fig. S4d), prompting us to investigate  
353 whether SA proteins could act as suppressors of R-loop formation. To this end, we  
354 treated RAD21<sup>mAC</sup> cells with scramble control siRNAs or siRNA to SA1, SA2 or AQR  
355 and used IF to assess the impact on nuclear S9.6 levels in KD cells (Fig.4e, f). As  
356 previously reported, AQR KD resulted in a 30.1% increase of mean nuclear S9.6 levels  
357 (p=0.0004). Compared to control siRNA-treated cells, mean SA1 levels were reduced  
358 by 56.2% (p=4.1E-40), while mean nuclear S9.6 staining was significantly increased  
359 in the same cells by 55.3% (p=3.90E-08) (Fig.3f, g). We note that perturbing SA1  
360 levels increased nuclear S9.6 staining to a similar extent as what was observed upon  
361 AQR KD, a bonafide R-loop regulator. When we treated cells with the custom siRNA  
362 to SA1 e31 (Fig 3e), we also observed an increase in S9.6 signals (Fig S4e),  
363 suggesting that this basic exon plays a role in R-loop stability. Surprisingly, despite  
364 efficient KD of SA2 (68% reduction), there was no significant change in nuclear S9.6  
365 staining (mean S9.6 reduced by 10% compared to control, p=0.17), indicating that  
366 although SA2 is localised to R-loops (Fig S4b), it does not seem to contribute to their  
367 regulation. Taken together, our results confirm the presence of SA proteins at  
368 endogenous R-loops *in vivo* and reveal a role for SA1 in R-loop suppression.

369

370 **SA contributes to cohesin loading independently of NIPBL.**

371 Our results thus far support a hypothesis whereby SA<sup>ΔCoh</sup> engages with RNA and  
372 various RNA binding proteins at clustered regulatory regions (possibly R-loops) to  
373 structurally support them and/or facilitate cohesin's association with chromatin.  
374 Indeed, several lines of evidence suggest that alongside the canonical NIPBL/Mau2  
375 loading complex, SA proteins contribute to cohesin's association with chromatin. In  
376 yeast, interaction of the SA orthologue with the loader complex is required for efficient  
377 association of the cohesin ring with DNA and subsequent ATPase activation<sup>13,14</sup>.  
378 Separating interactions into SA-loader and cohesin ring-loader subcomplexes still  
379 impairs cohesin loading, indicating that SA functions as more than just a bridge protein  
380<sup>14</sup>. Crystallisation studies reveal a striking similarity of NIPBL and SA, in that both are  
381 highly bent, HEAT-repeat proteins<sup>39,40</sup>. Indeed, NIPBL and SA1 interact together in  
382 an antiparallel arrangement and wrap around DNA and the cohesin ring via similar  
383 interactions in their respective 'U' surfaces, implying that SA1 has a role in the initial  
384 recruitment of cohesin to DNA alongside NIPBL (Shi 2020, Higashi 2020).

385 The RAD21<sup>mAC</sup> system has the unique advantage that when IAA is washed off  
386 cells, RAD21 proteins are no longer degraded and can be 're-loaded' back onto  
387 chromatin (Fig.5a). We coupled this to an siRNA-mediated KD of NIPBL to investigate  
388 whether cohesin re-loading onto chromatin is influenced by SA proteins in human cells  
389 in native conditions. RAD21<sup>mAC</sup> cells were treated with scramble or NIPBL siRNAs and  
390 subsequently grown in ethanol or IAA. The '0h post IAA wash-off' sample represents  
391 the extent of cohesin *degradation* in the IAA-treated cells. In parallel, IAA was washed  
392 out and the cells were left for 4h to recover. This sample, '4h post IAA wash-off'  
393 represents the extent of cohesin *re-loading* in the respective genetic background  
394 (Fig.5a, b). We confirmed loss of the loader complex by immunoblot for both NIPBL  
395 and MAU2 as it is known that MAU2 is de-stabilised upon NIPBL loss<sup>41</sup>. We note that  
396 re-loading was not fully restored to the levels observed in ethanol-treated cells and  
397 varied between experiments (Fig.5c), which may reflect differences in the initial  
398 amounts of RAD21 or NIPBL (see methods). Despite this variation, we observed a  
399 consistent effect on RAD21 re-loading across 8 independent experiments. As  
400 expected, in NIPBL KD conditions, mean RAD21 re-loading efficiency was reduced to  
401 40.9% of the siRNA controls (mean re-loading siNIPBL, 2.1 vs siCon, 3.6), however

402 this did not represent a statistically significant difference ( $p=0.33$ ) and accordingly, a  
403 large fraction of chromatin-associated RAD21 could still be detected in NIPBL KD cells  
404 (Fig. 5c), indicating that cells have a NIPBL-independent cohesin re-loading  
405 mechanism.

406 We performed the same experiment and this time, in addition to treating cells  
407 with siRNAs to NIPBL, we also included siRNA to SA1 and SA2 together (siSA), and  
408 a siNIPBL+ siSA condition to ask if SA proteins contribute to the observed NIPBL-  
409 independent reloading. Across 5 independent experiments, SA KD had a more  
410 dramatic effect on cohesin re-loading efficiency than NIPBL KD, reducing RAD21 re-  
411 loading on chromatin to 51% of scramble controls (mean re-loading siSA, 1.9 vs siCon,  
412 5.1,  $p=0.061$ ), (Fig. 5d, e). However, only when SA and NIPBL were both reduced in  
413 cells, was there a statistically significant change to cohesin re-loading, reducing  
414 RAD21 on chromatin to 64.9% of scramble control cells (mean re-loading  
415 siNIPBL+siSA, 1.42 vs siCon, 5.1,  $p=0.001$ ), indicating that SA performs an important  
416 and complementary step to NIPBL and MAU2 during normal reloading (Fig.5d, e).

417 Finally, given that SA localises to R-loops and these can be localized to many  
418 places across the genome, we reasoned that SA could use this structural platform to  
419 link the loading of cohesin to diverse biological processes. Therefore, we repeated the  
420 cohesin re-loading experiments in the presence of siRNAs to AQR, which we had  
421 previously shown act as suppressors of R-loops (Fig. 4e, f). AQR KD alone had little  
422 effect on cohesin re-loading efficiency (Fig. 5f, g), however when R-loops were  
423 increased in the context of reduced NIPBL, we observed an increase in the efficiency  
424 of cohesin re-loading compared to control cells (Fig. 5f, g). This increase in re-loading  
425 efficiency corresponded with a 2.08-fold increase in SA1 levels and a 1.46-fold  
426 increase in s9.6 levels, relative to siCon (Fig. S5a) while MAU2 and AQR showed a  
427 corresponding fold-change of 0.48 and 0.69, respectively, indicating the specificity of  
428 SA1 and R-loop increase. Our results support a role for R-loops in SA-mediated  
429 cohesin loading.

430

## 431 **DISCUSSION**

432 Whether SA proteins function in their own right outside of the cohesin complex is rarely  
433 considered. Consequently, our understanding of how these proteins contribute to  
434 cohesin function and disease is incomplete. In this study, we shed light on this  
435 question by uncovering a diverse repertoire of SA interactors in cells acutely depleted  
436 for the cohesin trimer. These range from proteins associated with translation and  
437 ribogenesis to RNA processing factors and regulators of the epitranscriptome. These  
438 observations suggest that SA proteins have a previously unappreciated role in post-  
439 transcriptional regulation of gene expression which offers much-needed new insight  
440 into its roles in disease and cancer.

441 Acute depletion of the cohesin ring has allowed us to capture a moment in the  
442 normal life cycle of cohesin – DNA associations and unveiled a previously  
443 unappreciated step for SA proteins. We show that cohesin-independent SA proteins  
444 bind to DNA and RNA, in the context of non-canonical RNA:DNA hybrid structures as  
445 we have shown here, or sequentially, and use this platform for the loading of cohesin  
446 to chromatin. Our results are supportive of biophysical observations of SA proteins  
447 and R-loops<sup>42</sup> and *in vitro* assessment of cohesin loading at DNA intermediates<sup>24</sup>.  
448 Structural studies suggest that NIPBL and SA1 together bend DNA and cohesin to  
449 guide DNA entering into the cohesin ring<sup>17,18,43</sup>. Our work shows that in cells lacking  
450 either the canonical NIPBL/MAU2 loader complex or the SA proteins, cohesin can still  
451 associate with chromatin, suggesting that loading can occur with either component  
452 alone, albeit most effectively together.

453 Since SA paralogues have distinct terminal ends and nucleic acid targeting  
454 mechanisms<sup>22,23</sup>, their initial recruitment to chromatin may be specified by unique  
455 DNA, RNA or protein-interactions, or indeed all three. Such diversification of loading  
456 platforms would be important in large mammalian genomes to ensure sufficient  
457 cohesin was chromatin associated or to direct stabilization of particular biological  
458 processes for a given cell fate<sup>44</sup>. Indeed, SA1 and SA2 show clear differences in  
459 interaction with FGF-motif containing proteins, despite the fact that both paralogs  
460 contain a CES domain<sup>45</sup>, underscoring the importance of *in vivo* studies and arguing  
461 that additional factors play an important role in complex stabilization. In this context,  
462 RNA-associated protein interaction has previously been shown to support cohesin

463 stabilisation at CTCF at the *IGF2/H19* locus <sup>46</sup>. These results are in line with our  
464 findings that a basic domain in the unstructured C-terminal portion of SA supports  
465 RNA-associated protein interactions and R-loop stability.

466 This study identifies SA proteins as novel regulators of RNA:DNA hybrid  
467 homeostasis. It is noteworthy that other suppressors of R-loop formation include  
468 mRNA processing factors, chromatin remodellers and DNA repair proteins <sup>47</sup> which all  
469 function in the context of nuclear bodies <sup>48</sup>. We find that SA proteins are enriched at  
470 very distal chromatin interactions in cohesin-depleted Hi-C data and they interact with  
471 numerous RNA binding proteins known to condense in 3D <sup>49,50</sup>. Harnessing such  
472 condensates would provide an efficient loading platform for cohesin at sites of similar  
473 biological function. If SA paralogs direct different localization of cohesin loading or  
474 stability of its association, this could have important implications in our understanding  
475 of disease and cancer.

476 **ACKNOWLEDGMENTS**

477 This work would not be possible without the support of a Senior Research Fellowship  
478 from the Wellcome Trust awarded to S.H. (106985/Z/15/Z) and a CRUK PhD  
479 studentship awarded to H.P. The Proteomics work was supported by the CRUK–UCL  
480 Centre Award [C416/A25145]. We thank Stanimir Dulev for his contributions at the  
481 early stages of the project. We would like to thank Konstantina Skourti-Stathaki for  
482 advice about S9.6 IFs and R-loops. We are grateful to the members of the Hadjur lab  
483 for critical discussions and reading of the manuscript.

484

485 **AUTHOR CONTRIBUTIONS**

486 H.P. and S.H. conceived the project. H.P. designed and performed all the colP, Mass  
487 spectrometry and cohesin re-loading experiments, analysed the ChIP and Hi-C data  
488 and performed the statistical analysis for mass spectrometry with the support of A.B.  
489 and S.S. Y.L. performed and analysed all imaging experiments (apart from STORM),  
490 derived clonal lines of RAD21-mAC cells, cloned YFP-tagged SA2 cDNAs and  
491 performed CLIP together with M.T.C. W.V. performed Hi-C, ChIP-seq and splicing  
492 analyses. M.V.N., L.M. and M.P.C. performed and analysed STORM imaging. D.P.  
493 discovered splicing features of the SA isoforms. H.P. and Y.L. prepared cellular  
494 materials for CLIP, which was carried out by M.B., M.T.C., and R.J. A.B. and S.S.  
495 performed mass spectrometric and proteomic analysis. H.P., Y.L and S.H. formatted  
496 all figures and wrote the manuscript with input from all authors.

497

498 **Declaration of Interests**

499 The authors declare no competing interests.

## 500 **FIGURE LEGENDS**

501

### 502 **Figure 1. SA interacts with CTCF in the absence of cohesin.**

503 A) Representative confocal images of SA1 and CTCF IF in RAD21<sup>mAC</sup> cells treated  
504 with ethanol (EtOH) as a control or Auxin (IAA) for 4hrs. Nuclei were counterstained  
505 with DAPI.

506

507 B) Imaris quantification of the fluorescence intensity of mClover, SA1 (top panel), SA2  
508 (bottom panel) and CTCF in EtOH and IAA-treated RAD21<sup>mAC</sup> cells. Whiskers and  
509 boxes indicate all and 50% of values respectively. Central line represents the median.  
510 Asterisks indicate a statistically significant difference as assessed using two-tailed t-  
511 test. \* p<0.05, \*\* p<0.005, \*\*\* p<0.0005, n.s., not significant. n>50 cells/condition from  
512 3 biological replicates.

513

514 Chromatin coIP of (C) SA1, SA2 and IgG with RAD21 and CTCF or (D) CTCF and  
515 IgG with RAD21, SA1 and SA2 in RAD21<sup>mAC</sup> cells treated with EtOH or IAA for  
516 4hrs. Input represents (C) 2.5% and (D) 1.25% of the material used for  
517 immunoprecipitation.

518

519 E) Dual-color STORM images of SA1 (green) and CTCF (magenta) in EtOH and IAA-  
520 treated RAD21<sup>mAC</sup> cells. Representative full nuclei and zoomed nuclear areas are  
521 shown. Line denotes 2 microns and 200nm for full nuclei and zoomed areas  
522 respectively. See supplementary Figures for SA2 STORM images.

523

524 F) Mean CTCF, SA1 and SA2 localization densities (localizations normalized with  
525 nuclear area) in EtOH and IAA-treated RAD21<sup>mAC</sup> cells (n = >30, >17 and >15 nuclei  
526 for CTCF, SA1 and SA2 respectively). Mean and SD are plotted, Mann Whitney test.  
527 \*\*\*\* p<0.0001.

528

529 G) Mean Nearest Neighbor Distance (NND) of CTCF, SA1 and SA2 clusters in  
530 nanometers in EtOH and IAA-treated cells (n = >38, >14 and >23 nuclei for CTCF,  
531 SA1 and SA2 respectively). Mean and SD are plotted, Mann Whitney test. \*\*\*\*  
532 p<0.0001.

533

534 H) Nearest Neighbor Distance (NND) distribution plot of the distance between CTCF  
535 and SA1 (left panel) or SA2 (right panel) clusters in EtOH and IAA-treated cells.  
536 Experimental data are shown as continuous lines, random simulated data are  
537 displayed as dotted lines.

538

539 I) ChIP-seq heat map of CTCF, SA1, SA2, Rad21 and  
540 SMC3 binding profiles in control (EtOH) and IAA-treated RAD21<sup>mAC</sup> cells. Selected  
541 regions are bound by CTCF in control conditions.

542

543 J) Analysis of contact frequency hotspots from Hi-C libraries generated from EtOH-  
544 treated (top row) and IAA-treated (bottom row) RAD21<sup>mAC</sup> cells. Contact frequencies  
545 were calculated in two distance ranges of 100kb – 1Mb and 1-5Mb. The last column  
546 includes contact frequencies specifically at residual SA-CTCF binding sites.

547



548 **Figure 2. Characterization of SA1 protein-protein interaction network in RAD21-**  
549 **depleted cells.**

550 A) Chromatin colP of SA1, SA2 and IgG with 4 predicted CES-binding proteins in  
551 RAD21<sup>mAC</sup> cells treated with EtOH or IAA for 4hrs. Input represents 1.25% of the  
552 material used for immunoprecipitation.

553  
554 B) Volcano plot displaying the statistical significance (-log<sub>10</sub> p-value) versus  
555 magnitude of change (log<sub>2</sub> fold change) from SA1 IP-MS data produced  
556 from RAD21<sup>mAC</sup> cells treated with ethanol or IAA (n=3). Vertical dashed lines represent  
557 changes of 1.5-fold. Horizontal dashed line represents a pvalue of 0.1.  
558 Cohesin complex members and validated high-confidence proteins have been  
559 highlighted.

560  
561 C) SA1<sup>ΔCoh</sup> interaction network of protein-protein interactions identified in  
562 RAD21<sup>mAC</sup> cells using STRING. Node colours describe the major  
563 enriched categories, with squares denoting helicases and polygons  
564 denoting hnRNP family members. Proteins within each enrichment category were  
565 subset based on p-value change in B). See supplemental figures for full network.

566  
567 D) Chromatin IP of SA1 and IgG in RAD21<sup>mAC</sup> cells treated with EtOH or IAA and  
568 immunoblotted with antibodies to validate the proteins identified by IP-MS. Input  
569 represents 1.25% of the material used for immunoprecipitation. \* We note that ESYT2  
570 is a FGF-containing protein.

571  
572  
573

574 **Figure 3. SA proteins bind to RNA.**

575 A) CLIP for SA1, SA2 and non-specific IgG controls. Autoradiograms of crosslinked  
576 <sup>32</sup>P-labelled RNA are shown at the top and the corresponding immunoblots, below.  
577 CLIP was performed with and without UV crosslinking and polynucleotide kinase  
578 (PNK) and with high (H; 1/50 dilution) or low (L; 1/500 dilution) concentrations of  
579 RNase I.

580  
581 B) CLIP for SA1, SA2 and non-specific IgG control in ethanol (-) or IAA-treated  
582 Rad21<sup>mAC</sup> cells. <sup>32</sup>P-labelled RNA and the corresponding immunoblots are shown as  
583 above.

584  
585 C) Schematic of the SA1 and SA2 proteins showing the SA1-specific AT-hook, the  
586 conserved CES domain (blue) and the acidic C-terminus (green) which contains  
587 the basic alternatively spliced exon (red). Right-hand zoom-in indicates the spliced  
588 exons for SA1 (top) and SA2 (bottom) and the pI for each. The conservation scores for  
589 the divergent N- and C-termini and the middle portion of the proteins which contains  
590 the CES domain are shown.

591  
592 (D) Percent Spliced In (PSI) calculations for SA1 exon 31 (black) and SA2 exon 32  
593 (grey) based on VAST-Tools analysis of RNA-seq from multiple datasets (see  
594 Methods).

595



596 (E) Western blot analysis of SA1 levels in whole cell lysates after treatment  
597 with scrambled siRNAs (siCon), SmartPool SA1 siRNAs (siSA1 SP),  
598 control esiRNAs (esiCon) and esiRNA designed to target SA1 exon  
599 31 for 48hrs in RAD21<sup>mAC</sup> cells. H3 serves as a loading control. The percentage of  
600 knockdown (KD) after SA1 signal is normalised to H3 is shown.

601  
602 (F) Western blot analysis of SA2 levels in whole cell lysates after treatment with  
603 scrambled siRNAs (siCon), SmartPool SA2 siRNAs (siSA2 SP),  
604 control esiRNAs (esiCon) and siRNA designed to target SA2 exon 32  
605 for 48hrs in RAD21<sup>mAC</sup> cells. H3 serves as a loading control. . The percentage of  
606 knockdown (KD) after SA2 signal is normalised to H3 is shown.

607  
608 (G) CLIP with endogenous SA2 (as in A, B above), IgG control and cells where  
609 either YFP-tagged full-length SA2 or YFP-tagged SA2 lacking exon 32 are expressed  
610 for 48hrs. CLIP reveals proteins which specifically associate with exon-32 containing  
611 SA2 (arrow).

612  
613

614 **Figure 4. SA proteins act as suppressors of endogenous R-loops.**

615 (A) Adjusted p-value (FDR) for enrichment of S9.6 interactome data from Cristini et al.  
616 and Wang et al., with the SA1<sup>ΔCoh</sup> interactome. Overlap indicates the proteins  
617 identified in both S9.6 interactome datasets, representing a high confidence R-loop  
618 interactome list.

619  
620 (B) Chromatin colP of S9.6 and IgG in RAD21<sup>mAC</sup> cells treated with RNase H enzyme  
621 and immunoblotted with antibodies representing known R-loop proteins, as well as  
622 SA1. Input represents 1.25% of the material used for  
623 immunoprecipitation. Bottom, S9.6 dot blot of lysates used in colP.

624  
625 (C) Representative confocal images of S9.6, SA1 and SA2 IF in RAD21<sup>mAC</sup> cells  
626 treated with control buffer or RNase H enzyme. Nuclear outlines (white) are derived  
627 from DAPI counterstain.

628  
629 (D) Fluorescence Intensity of S9.6, SA1 and SA2 protein assessed by  
630 Immunofluorescence in (C). Data are from three biological replicates with >50 cells  
631 counted/condition). Quantifications and statistical analysis were done as above.

632  
633 (E) Representative confocal images of S9.6 and SA1, SA2 or AQR IF in  
634 RAD21<sup>mAC</sup> cells treated with scramble control siRNA (si scr) or siRNA to the protein of  
635 interest. Nuclear outlines (white) are derived from DAPI counterstain.

636  
637 (F) Fluorescence Intensity of S9.6, SA1, SA2 and AQR proteins assessed by  
638 Immunofluorescence in (E). Data are from three biological replicates with >50 cells  
639 counted/condition). Quantifications and statistical analysis were done as previously  
640 stated.

641  
642  
643

644 **Figure 5. SA proteins contribute to cohesin loading at R-loops.**

645 (A) Schematic of experimental set-up. RAD21<sup>mAC</sup> cells expressing mClover (green  
646 cells in dishes) were treated with scramble siRNAs or siRNA to NIPBL. Prior to  
647 collection, cells were cultured in ethanol or IAA for 4hrs to degrade RAD21 (0 h  
648 timepoints). Each sample was then split into those cultured in ethanol or IAA for 4hrs to  
649 degrade RAD21 (0h timepoints). The IAA treatment was washed-off and the cells were  
650 left to recover for 4hrs (4h timepoints). Chromatin fractions were prepared from all  
651 samples and used in immunoblot analysis.

652

653 (B) Representative western blot analysis of chromatin-bound RAD21, MAU2 and  
654 NIPBL levels in RAD21<sup>mAC</sup> cells treated according to the schematic shown in (A). H3  
655 was used as a loading control. *NB* The full blots can be seen in the supplement.

656

657 (C) RAD21 fold change relative to siCon samples at the 0h timepoint in siCon 4h (light  
658 grey), siNIPBL 0hr (light blue) and siNIPBL 4hr (dark blue). Whiskers and boxes  
659 indicate all and 50% of values respectively. Central line represents the  
660 median. statistical analysis as assessed using a two-tailed t-test. Data is  
661 from 8 biological replicates.

662

663 (D) Representative western blot analysis of chromatin-bound RAD21, SA1, SA2,  
664 MAU2 and NIPBL levels in RAD21<sup>mAC</sup> cells treated according to the schematic  
665 shown in (A) and including samples treated with siRNA to SA1 and SA2 together  
666 (siSA) and siRNA to NIPBL + siSA. H3 was used as a loading control.

667

668 (E) RAD21 fold change relative to siCon samples at the 0h timepoint  
669 in siCon, siNIPBL, siSA and siNIPBL+siSA. Asterisks indicate a statistically significant  
670 difference as assessed using 2-tailed T-test. \*\*  $p < 0.005$ . Data is from 5 biological  
671 replicates.

672

673 (F) Representative western blot analysis of chromatin-bound RAD21, AQR, MAU2 and  
674 NIPBL levels in RAD21<sup>mAC</sup> cells treated according to the schematic shown in (A) and  
675 including samples treated with siRNA to AQR and siRNA to NIPBL + AQR. H3 was  
676 used as a loading control. RAD21\* denotes increased exposure. NIPBL levels could  
677 not be determined due to incompatibility with assessing RNA:DNA hybrids. *NB* siCon  
678 samples were cropped here and the full blots can be seen in the supplement.

679

680 (G) RAD21 fold change relative to siCon samples at the 0h timepoint  
681 in siCon, siNIPBL, siAQR and siNIPBL+siAQR. Data is from 2 biological replicates and  
682 is represented as mean +/- SEM.

683

684

685

## 686 REFERENCES

- 687 1. Leiserson, M. D. M. *et al.* Pan-cancer network analysis identifies combinations of rare  
688 somatic mutations across pathways and protein complexes. *Nat. Genet.* **47**, 106–114  
689 (2015).
- 690 2. Horsfield, J. A. *et al.* Cohesin-dependent regulation of Runx genes. *Development* **134**,  
691 2639–2649 (2007).
- 692 3. Viny, A. D. & Levine, R. L. Cohesin mutations in myeloid malignancies made simple.  
693 *Curr. Opin. Hematol.* **25**, 61–66 (2018).
- 694 4. Hadjur, S. *et al.* Cohesins form chromosomal cis-interactions at the developmentally  
695 regulated IFNG locus. *Nature* **460**, 410–413 (2009).
- 696 5. Sofueva, S. *et al.* Cohesin-mediated interactions organize chromosomal domain  
697 architecture. *EMBO J.* **32**, 3119–3129 (2013).
- 698 6. Zuin, J. *et al.* Cohesin and CTCF differentially affect chromatin architecture and gene  
699 expression in human cells. *Proc. Natl. Acad. Sci. U.S.A.* **111**, 996–1001 (2014).
- 700 7. Kojic, A. *et al.* Distinct roles of cohesin-SA1 and cohesin-SA2 in 3D chromosome  
701 organization. *Nature Publishing Group* **25**, 496–504 (2018).
- 702 8. Rao, S. S. P. *et al.* Cohesin Loss Eliminates All Loop Domains. *Cell* **171**, 305–309.e24  
703 (2017).
- 704 9. Wutz, G. *et al.* Topologically associating domains and chromatin loops depend on  
705 cohesin and are regulated by CTCF, WAPL, and PDS5 proteins. *EMBO J.* **36**, 3573–  
706 3599 (2017).
- 707 10. Fudenberg, G., Abdennur, N., Imakaev, M., Goloborodko, A. & Mirny, L. Emerging  
708 Evidence of Chromosome Folding by Loop Extrusion. *bioRxiv* 1–24 (2018).  
709 doi:10.1101/264648
- 710 11. Balbás-Martínez, C. *et al.* Recurrent inactivation of STAG2 in bladder cancer is not  
711 associated with aneuploidy. *Nat. Genet.* **45**, 1464–1469 (2013).
- 712 12. Solomon, D. A. *et al.* Frequent truncating mutations of STAG2 in bladder cancer. *Nat.*  
713 *Genet.* **45**, 1428–1430 (2013).
- 714 13. Murayama, Y. & Uhlmann, F. Biochemical reconstitution of topological DNA binding by  
715 the cohesin ring. *Nature* **505**, 367–371 (2014).
- 716 14. Orgil, O. *et al.* A conserved domain in the scc3 subunit of cohesin mediates the  
717 interaction with both mcd1 and the cohesin loader complex. *PLoS Genet.* **11**, e1005036  
718 (2015).
- 719 15. Ciosk, R. *et al.* Cohesin's Binding to Chromosomes Depends on a Separate Complex  
720 Consisting of Scc2 and Scc4 Proteins. *Molecular Cell* **5**, 243–254 (2000).
- 721 16. Li, Y. *et al.* Structural basis for Scc3-dependent cohesin recruitment to chromatin. *eLIFE*  
722 **7**, 352 (2018).
- 723 17. Shi, Z., Gao, H., Bai, X.-C. & Yu, H. Cryo-EM structure of the human cohesin-NIPBL-  
724 DNA complex. *Science* **368**, 1454–1459 (2020).
- 725 18. Higashi, T. L. *et al.* A Structure-Based Mechanism for DNA Entry into the Cohesin Ring.  
726 *Molecular Cell* **79**, 917–933.e9 (2020).
- 727 19. Xiao, T., Wallace, J. & Felsenfeld, G. Specific sites in the C terminus of CTCF interact  
728 with the SA2 subunit of the cohesin complex and are required for cohesin-dependent  
729 insulation activity. *Mol. Cell. Biol.* **31**, 2174–2183 (2011).
- 730 20. Saldaña-Meyer, R. *et al.* CTCF regulates the human p53 gene through direct interaction  
731 with its natural antisense transcript, Wrap53. *Genes Dev.* **28**, 723–734 (2014).
- 732 21. Bisht, K. K., Daniloski, Z. & Smith, S. SA1 binds directly to DNA through its unique AT-  
733 hook to promote sister chromatid cohesion at telomeres. *J. Cell. Sci.* **126**, 3493–3503  
734 (2013).
- 735 22. Lin, J. *et al.* Functional interplay between SA1 and TRF1 in telomeric DNA binding and  
736 DNA-DNA pairing. *Nucleic Acids Research* **44**, 6363–6376 (2016).
- 737 23. Countryman, P. *et al.* Cohesin SA2 is a sequence-independent DNA-binding protein that  
738 recognizes DNA replication and repair intermediates. *J. Biol. Chem.* **293**, 1054–1069  
739 (2018).
- 740 24. Murayama, Y., Samora, C. P., Kurokawa, Y., Iwasaki, H. & Uhlmann, F. Establishment  
741 of DNA-DNA Interactions by the Cohesin Ring. *Cell* 1–29 (2018).

- 742 doi:10.1016/j.cell.2017.12.021  
743 25. Zheng, G., Kanchwala, M. & Xing, C. MCM2–7-dependent cohesin loading during S  
744 phase promotes sister-chromatid cohesion. *eLIFE* 1–25 (2018).  
745 doi:10.7554/eLife.33920.001  
746 26. Natsume, T., Kiyomitsu, T., Saga, Y. & Kanemaki, M. T. Rapid Protein Depletion in  
747 Human Cells by Auxin-Inducible Degron Tagging with Short Homology Donors. *Cell Rep*  
748 **15**, 210–218 (2016).  
749 27. Parelho, V. *et al.* Cohesins functionally associate with CTCF on mammalian  
750 chromosome arms. *Cell* **132**, 422–433 (2008).  
751 28. Wendt, K. S. *et al.* Cohesin mediates transcriptional insulation by CCCTC-binding factor.  
752 *Nature* **451**, 796–801 (2008).  
753 29. Roig, M. B. *et al.* Structure and function of cohesin’s Scc3/SA regulatory subunit.  
754 *FEBS Letters* **588**, 3692–3702 (2014).  
755 30. Hons, M. T. *et al.* Topology and structure of an engineered human cohesin complex  
756 bound to Pds5B. *Nature Communications* **7**, 1–11 (2017).  
757 31. Kim, J.-S. *et al.* Systematic proteomics of endogenous human cohesin reveals an  
758 interaction with diverse splicing factors and RNA-binding proteins required for mitotic  
759 progression. *J. Biol. Chem.* **294**, 8760–8772 (2019).  
760 32. Irimia, M. *et al.* A Highly Conserved Program of Neuronal Microexons Is Misregulated in  
761 Autistic Brains. *Cell* **159**, 1511–1523 (2014).  
762 33. Santos-Pereira, J. M. & Aguilera, A. R loops: new modulators of genome dynamics and  
763 function. *Nat. Rev. Genet.* **16**, 583–597 (2015).  
764 34. Cristini, A., Groh, M., Kristiansen, M. S. & Gromak, N. RNA/DNA Hybrid Interactome  
765 Identifies DXH9 as a Molecular Player in Transcriptional Termination and R-Loop-  
766 Associated DNA Damage. *Cell Rep* **23**, 1891–1905 (2018).  
767 35. Wang, I. X. *et al.* Human proteins that interact with RNA/DNA hybrids. *Genome Res.* **28**,  
768 1405–1414 (2018).  
769 36. Sollier, J. *et al.* Transcription-coupled nucleotide excision repair factors promote R-loop-  
770 induced genome instability. *Molecular Cell* **56**, 777–785 (2014).  
771 37. Skourti-Stathaki, K., Kamieniarz-Gdula, K. & Proudfoot, N. J. R-loops induce repressive  
772 chromatin marks over mammalian gene terminators. *Nature* **516**, 436–439 (2014).  
773 38. Cerritelli, S. M. & Crouch, R. J. Ribonuclease H: the enzymes in eukaryotes. *FEBS J.*  
774 **276**, 1494–1505 (2009).  
775 39. Kikuchi, S., Borek, D. M., Otwinowski, Z., Tomchick, D. R. & Yu, H. Crystal structure of  
776 the cohesin loader Scc2 and insight into cohesinopathy. *Proc. Natl. Acad. Sci. U.S.A.*  
777 **113**, 12444–12449 (2016).  
778 40. Hara, K. *et al.* Structure of cohesin subcomplex pinpoints direct shugoshin-Wapl  
779 antagonism in centromeric cohesion. *Nature Publishing Group* **21**, 864–870 (2014).  
780 41. Watrin, E. *et al.* Human Scc4 is required for cohesin binding to chromatin, sister-  
781 chromatid cohesion, and mitotic progression. *Curr. Biol.* **16**, 863–874 (2006).  
782 42. Pan, H. *et al.* Cohesin SA1 and SA2 are RNA binding proteins that localize to RNA  
783 containing regions on DNA. *Nucleic Acids Research* **24**, 105–17 (2020).  
784 43. Chao, W. C. H. *et al.* Structural Studies Reveal the Functional Modularity of the Scc2-  
785 Scc4 Cohesin Loader. *Cell Rep* **12**, 719–725 (2015).  
786 44. Pezic, D. *et al.* The cohesin regulator Stag1 promotes cell plasticity through  
787 heterochromatin regulation. *bioRxiv* 1–60 (2021). doi:10.1101/2021.02.14.429938  
788 45. Li, Y. *et al.* The structural basis for cohesin-CTCF-anchored loops. *Nature* **578**, 472–476  
789 (2020).  
790 46. Yao, H. *et al.* Mediation of CTCF transcriptional insulation by DEAD-box RNA-binding  
791 protein p68 and steroid receptor RNA activator SRA. *Genes Dev.* **24**, 2543–2555  
792 (2010).  
793 47. García-Muse, T. & Aguilera, A. R Loops: From Physiological to Pathological Roles. *Cell*  
794 1–15 (2019). doi:10.1016/j.cell.2019.08.055  
795 48. Misteli, T. Beyond the Sequence: Cellular Organization of Genome Function. *Cell* **128**,  
796 787–800 (2007).  
797 49. Nozawa, R.-S. *et al.* SAF-A Regulates Interphase Chromosome Structure through  
798 Oligomerization with Chromatin-Associated RNAs. *Cell* **169**, 1214–1227.e18 (2017).  
799 50. Huo, X. *et al.* The Nuclear Matrix Protein SAFB Cooperates with Major Satellite RNAs to

- 800 Stabilize Heterochromatin Architecture Partially through Phase Separation. *Molecular*  
801 *Cell* **77**, 368–383.e7 (2020).
- 802 51. Barrington, C., Georgopoulou, D., Nature, D. P.2019. Enhancer accessibility and CTCF  
803 occupancy underlie asymmetric TAD architecture and cell type specific genome  
804 topology. *Nat Communications*. doi:10.1038/s41467-019-10725-9
- 805 52. Cox, J. & Mann, M. MaxQuant enables high peptide identification rates, individualized  
806 p.p.b.-range mass accuracies and proteome-wide protein quantification. *Nat Biotechnol*  
807 **26**, 1367–1372 (2008).
- 808 53. Choi, M. *et al.* MSstats: an R package for statistical analysis of quantitative mass  
809 spectrometry-based proteomic experiments. *Bioinformatics* **30**, 2524–2526 (2014).
- 810 54. Beltran, M. *et al.* The interaction of PRC2 with RNA or chromatin is mutually  
811 antagonistic. *Genome Res.* **26**, 896–907 (2016).
- 812



## 813 **METHODS**

### 814 **Cell culture and IAA-mediated degradation of Rad21.**

815 HCT116 cells with engineered RAD21-miniAID-mClover (RAD21<sup>mAC</sup>), or OsTIR1-  
816 only, or both (RAD21<sup>mAC</sup>-OsTIR) were obtained from Masato T. Kanemaki. The cells  
817 were maintained in McCoy's 5A medium with Glutamax (Thermo Fisher Scientific)  
818 supplemented with 10% Heat-inactivated FBS  
819 (Gibco), 700 $\mu$ g/ml Geneticin, 100 $\mu$ g/ml Hygromycin B Gold and 100 $\mu$ g/ml Puromycin  
820 as described in (Natsume). We clonally selected the RAD21<sup>mAC</sup>-OsTIR cells by  
821 sorting green fluorescence positive single cells on a FACS Aria Fusion cell sorter (BD  
822 Bioscience). Single cells were individually seeded into one well of a 96-well plate,  
823 expanded for 10 days into 6cm culture dishes and selected with Geneticin,  
824 Hygromycin B Gold and Puromycin as indicated above in McCoy's medium for another  
825 10 days. Each clone was assessed for efficiency of Rad21 degradation using FACS  
826 analysis and western blotting (WB) using mClover, mAID and OsTIR antibodies. Two  
827 clones (H2 and H11) were taken forward and used throughout this study. To deplete  
828 RAD21, RAD21<sup>mAC</sup>-OsTIR cells were grown in adherent conditions for 3 days and  
829 treated with 500  $\mu$ M Indole-3-acetic acid (IAA, Auxin, diluted in ethanol) for 4  
830 hours. For IAA withdrawal, IAA treated cells were washed with PBS and replaced with  
831 fresh supplemented McCoy's medium for another 4 hours. Cells were washed twice  
832 with ice-cold PBS before being harvested for later experimental procedures.

833

### 834 **siRNA-mediated knockdowns.**

835 For siRNA transfections, RAD21<sup>mAC</sup>-OsTIR cells were reverse transfected with  
836 scramble siRNA (siCon) or siRNAs targeting SA1, SA2, NIPBL, or AQR (Dharmacon,  
837 Horizon Discovery). A final concentration of 10 nM of siSA1, siSA2, or siNIPBL or  
838 5 nM of siAQR was reverse transfected into the cells using  
839 Lipofectamine RNAiMAX reagent (Invitrogen), as per the manufacturer's  
840 instructions. Cells were plated at a density of 1 – 1.25 x 10<sup>6</sup> cells per 10 cm dish and  
841 harvested 72hrs post-transfection, at a confluency of ~70%. The Lipofectamine-  
842 containing media was replaced with fresh media 12-16 hrs post-transfection to avoid  
843 toxicity. For Figure 5f/g, incubation time was reduced to 48 hrs. To account for the  
844 reduced growth time, cells were plated at a density of 2-3 x 10<sup>6</sup> cells per 10 cm dish.  
845 Here siCon- and siNIPBL-transfected cells were plated at a lower cell number  
846 than siAQR-transfected cells to ensure equalised confluence (~70%) at the time of  
847 collection. When IAA-treatment was combined with siRNA mediated KD, the IAA was  
848 added at the end of the normal KD condition so that total KD time was not changed  
849 compared to UT cells. For esiRNA treatment, RAD21<sup>mAC</sup>-OsTIR cells were reverse-  
850 transfected with 20  $\mu$ M FLUC control esiRNA or esiRNA custom designed to SA1  
851 exon31 or SA2 exon32 (MISSION® siRNA, Sigma Aldrich)  
852 using RNAiMAX (Invitrogen). Cells were incubated in transfection mixture for 7-8  
853 hours before being replaced with fresh supplemented McCoy's medium and left for

854 another 40h until harvest. Efficiency of KD was assessed by WB. siRNA information  
855 can be found in Table 1.

856

### 857 **Immunofluorescence**

858 Cells were adhered onto poly L-lysine coated glass coverslips in 6 well  
859 culture dishes and were washed twice with ice-cold PBS before IF procedures. For  
860 RAD21-depletion analysis, cells were fixed for 10 mins at room temperature with 3.7%  
861 paraformaldehyde (Alfa Aesar) in PBS, washed 3 times with PBS and  
862 then permeabilized at room temperature for 10 mins with 0.25% Triton X-100 in PBS  
863 (Sigma Aldrich). For R-loop imaging, cells were fixed and permeabilised with ice-cold  
864 ultra-pure methanol (Sigma Aldrich) for 10 mins at -20°C. After 3 washes with PBS,  
865 cells were blocked for 45 mins at room temperature with 10% FCS-PBS. For  
866 RNASEH1 enzyme treatment, cells were incubated with blocking solution  
867 supplemented with 1x RNASEH1 reaction buffer alone (50 mM Tris-HCl, 75 mM KCl,  
868 3 mM MgCl<sub>2</sub>, 10 mM DTT) or 5 units of RNASEH1 enzyme (M0297, New England  
869 Biolabs) for 30 mins at 37 °C, PBS-washed twice, before blocking. Cells were washed  
870 twice with PBS before incubation with primary antibodies diluted in 5% FCS-PBS at 4  
871 °C overnight. Anti-SA1, anti-SA2 and anti-AQR were used at 1:3000 dilutions; anti-  
872 CTCF was used at 1:2500 dilution; anti-s9.6 was used at 1:1000 dilution; anti-V5 was  
873 used at 1:1000. After 4 washes with PBS, cells were incubated with secondary  
874 antibodies (donkey anti-Goat AF555 or AF647 for SA1/2 used at 1:3000; donkey anti-  
875 Rabbit AF647 for CTCF used at 1:2500; donkey anti-Mouse AF555 for s9.6 used at  
876 1:2000; donkey anti-Rabbit AF647 for AQR used at 1:3000; donkey anti-Rabbit AF488  
877 for V5 used at 1:2000)) in 5% FCS-PBS for 1 hour at room temperature, and washed  
878 4 times with PBS before being mounted onto glass slides with ProLong™ Diamond  
879 Antifade Mountant with DAPI (Thermo Fisher Scientific) to stabilise overnight in dark  
880 before imaging. See Table 2 for details of where antibodies were purchased.

881 Imaging was performed on Zeiss LSM confocal microscopes using 63x/1.40  
882 NA Oil Plan-Apochromat objective lens (Carl Zeiss, Inc.). Images were captured as z-  
883 stacks and under consistent digital gain, laser intensity and resolution for each  
884 experiment. Numerical analysis was carried out using Imaris software (Oxford  
885 Instruments, version 9.5.1) and representative images are shown as maximum z-  
886 projected views generated using Fiji Image J. In brief, z-stack images were imported  
887 into Imaris, cells were identified using DAPI and only those located 1 μm away from  
888 image boundary and sized between 120-800 μm<sup>3</sup> were selected. A seed-split function  
889 of 7.5um was used to separate closely situated cells. Fluorescence intensities of  
890 individual DAPI-selections in each channel were determined by Imaris and exported  
891 into Excel for further analysis. Distribution plots were generated from >50 cells of each  
892 replicate with 3 biological replicates per experiment. Student's *t*-test was performed  
893 between control and experimental conditions and statistical significance was  
894 determined by detecting the difference between means (unequal variance, two-tailed).

895 Significance is denoted as  $p > 0.05$  = not significant (ns),  $p \leq 0.05$  = \*,  $p \leq 0.01$  = \*\*,  
896  $p \leq 0.001$  = \*\*\* and  $p \leq 0.0001$  = \*\*\*\*.

897

### 898 **Chromatin Fractionation and colmunoprecipitation.**

899 Cells were washed twice with ice-cold PBS (Sigma Aldrich) and lysed in Buffer A (10  
900 mM HEPES, 10mM KCl, 1.5 mM MgCl<sub>2</sub>, 0.34 M Sucrose, 10% Glycerol, 1mM DTT,  
901 1mM PMSF/Pefabloc, protease inhibitor), supplemented with 0.1% T-X100, for 10 min  
902 on ice. Lysed cells were collected by scraping. Nuclei and cytoplasmic  
903 material was separated by centrifugation for 4 min at 1300 g at 4oC. The supernatant  
904 was collected as the cytoplasmic fraction and cleared of any insoluble material with  
905 further centrifugation for 15 min at 20,000 g at 4oC. The nuclear pellet was washed  
906 once with buffer A before lysis in buffer B (3mM EDTA, 0.2mM EGTA, 1mM DTT, 1mM  
907 PMSF/Pefabloc, protease inhibitor) with rotation for 30 min at 4oC. Insoluble nuclear  
908 material was spun down for 4 min at 1700 g at 4oC and the supernatant taken as  
909 nuclear soluble fraction. The insoluble material was wash once with buffer B and then  
910 resuspended in high-salt chromatin solubilization buffer (50mM Tris-HCl pH 7.5, 1.5  
911 mM MgCl<sub>2</sub>, 500mM KCl, 1mM EDTA, 20% Glycerol, 0.1% NP-40, 1mM  
912 PMSF/Pefabloc, protease inhibitor). The lysate was vortexed for 2 min to aid  
913 solubilization. Nucleic acids were digested with 85U benzonase (Sigma-Aldrich) per  
914 100 x 10<sup>6</sup> cells, with incubation for 10 min at 37oC and 20 min at 4oC. Chromatin was  
915 further solubilized with ultra-sonication for 3 x 10 sec at an amplitude of 30. The lysate  
916 was diluted to 200 mM KCl and insoluble material was removed by centrifugation at  
917 15,000 RPM for 30 min at 4oC.

918 For coIP, antibodies were bound to Dynabead Protein A/G beads  
919 (ThermoFisher Scientific) for 10 min at room temperature and ~ 5 hr at 4oC. For mock  
920 IgG IPs, beads were incubated with serum from the same host type as the antibody of  
921 interest. 1mg of chromatin extract was incubated with the antibody-bead conjugate per  
922 IP for approximately 16 hr at 4oC. IPs were washed x5 with IP buffer (200mM  
923 chromatin solubilization buffer) and eluted by boiling in either 2x Laemmli sample  
924 buffer (BioRad) or 4x NuPAGE LDS sample buffer (ThermoFisher Scientific). Proteins  
925  $\leq 250$  kDa were separated by SDS-PAGE electrophoresis using 4–20% Mini-  
926 PROTEAN® TGX™ Precast Protein Gels (BioRad) and transferred to Immobilon-P  
927 PVDF Membrane (Merck Millipore) for detection. Proteins  $\geq 250$  kDa were separated  
928 by SDS-PAGE electrophoresis using Invitrogen NuPAGE 3-8% Tris-Acetate precast  
929 protein gels. Transfer was extended to overnight with low voltage (20V) to aid in  
930 transfer of the high-molecular weight proteins. Membranes were incubated in primary  
931 antibody solution overnight at 4oC and images were detected using chemiluminescent  
932 fluorescence. Densitometry was carried out using ImageStudio Lite software with  
933 statistical significance calculated by unpaired t test, unless otherwise specified. Fold  
934 enrichment quantifications were performed by first normalising the raw densitometry  
935 value to its corresponding Histone H3 quantification and the comparing between the  
936 samples indicated. See Table 2 for details of antibodies.



937

### 938 **S9.6 IP and Dot Blot.**

939 Cells were fractionated and processed for S9.6 IP as described above, with the following  
940 modifications. To avoid digestion of RNA:DNA hybrids, samples were not treated  
941 with benzonase during chromatin solubilization and sonication was carried out for 10  
942 min (Diagenode Biorupter) as in <sup>34</sup>. Where indicated, chromatin samples were treated  
943 with Ribonuclease H enzyme (NEB) overnight at 37°C to digest RNA:DNA hybrids in  
944 the extract. To avoid detection of single-stranded RNA by the S9.6 antibody, all S9.6  
945 IP samples were pre-treated with Purelink RNase A (Thermo Fisher Scientific) at  
946 0.25ug/1mg chromatin extract for 1 hr 30 min at 4°C. The reaction was stopped with  
947 addition of 143U Invitrogen SUPERase•In RNase Inhibitor (Thermo Fisher  
948 Scientific). RNA:DNA hybrid levels were assessed in chromatin samples by dot blot.  
949 Specifically, the chromatin lysate was directly wicked  
950 onto Amersham Protran nitrocellulose membrane (Merck) by pipetting small volumes  
951 above the membrane. Membranes were blocked in 5% (w/v) non-fat dry milk in PBS-  
952 0.1% Tween and incubated with S9.6 antibody overnight as for standard western blot.  
953 As above, detection was carried out using chemiluminescent fluorescence. RNase A-  
954 mediated digestion of RNA:DNA hybrids was performed using a non-ssRNA-specific  
955 enzyme (Thermo Scientific) at 1.5ug/25ug chromatin extract at 37°C.

956

### 957 **ChIP-sequencing, library preparation and analysis.**

958 ChIP lysates were prepared from RAD21<sup>mAC</sup> cells treated with ethanol or IAA for  
959 4hrs in two biological replicates. Formaldehyde (1%) was added to the culture  
960 medium for 10min at room temperature. Fixation was blocked with 0.125M glycine and  
961 cells were washed in cold PBS. Nuclear extracts were prepared by douncing (20  
962 strokes, medium pestle) in swelling buffer (25 mM HEPES pH8, 1.5 mM MgCl<sub>2</sub>, 10mM  
963 KCL, 0.1% NP40, 1 mM DTT and protease inhibitors) and centrifuged for 5min at  
964 2000rpm at 4C. Nuclear pellets were resuspended in Sucrose buffer I  
965 (15mM Hepes pH 8, 340 mM Sucrose, 60mM KCL, 2mM EDTA, 0.5 mM EGTA, 0.5%  
966 BSA, 0.5 mM DTT and protease inhibitors) and dounced again with 20 strokes. The  
967 lysate was carefully laid on top of an equal volume of Sucrose buffer  
968 II (15mM Hepes pH 8, 30% Sucrose, 60mM KCL, 2mM EDTA, 0.5 mM EGTA, 0.5 mM  
969 DTT and protease inhibitors) and centrifuged for 15min at 4000rpm at 4C. Nuclei were  
970 washed twice to remove cytoplasmic proteins, centrifuged and the pellet was  
971 resuspended in Sonication/RIPA buffer (50mM Tris, pH 8.0, 140 mM NaCl, 1 mM  
972 EDTA, 1% Triton X-100, 0.1% Na-deoxycholate, 0.1% SDS and protease inhibitors) at  
973 a concentration of 5 x10<sup>6</sup> nuclei in 130µl buffer. This was transferred to a sonication  
974 tube (AFA Fiber Pre-Slit Snap-Cap 6x16mm) and sonicated in a Covaris S2 (settings;  
975 4 cycles of 60 seconds, 10% duty cycle, intensity: 5, 200 cycles per  
976 burst). Soluble chromatin was in the range of 200 - 400 bp. Triton X100 was added  
977 (final concentration 1%) to the sonicated chromatin and moved to a low-retention

978 tube (Eppendorf) before centrifugation at 14,000 rpm for 15min at 4C and pellets were  
979 discarded. 1/100<sup>th</sup> of the chromatin lysate was retained as the Input sample.

980 For Immunoprecipitation, 200ug chromatin aliquots/IP were precleared with a  
981 slurry of Protein A/G (50:50) (Dynabeads) and incubated for 4hr at 4C. Meanwhile,  
982 washed Protein A/G beads (40ul per IP) were mixed with primary antibodies and  
983 incubated for 4hrs at 4C. The following amounts of antibodies were used: anti-  
984 CTCF, 5ug/ChIP; anti-SA1, 15ug/ChIP; anti-SA2, 10ug of the mixed antibody  
985 pack/ChIP; anti-Smc3, 5ug/ChIP and anti-IgG, 10ug/ChIP. See Table 2 for information  
986 about the antibodies. Washed, pre-bound Protein A/G beads+antibody were mixed  
987 with pre-cleared chromatin lysates and incubated overnight with rotation at 4C. The  
988 next day, the supernatant was removed and the beads were washed 9 times with  
989 increasing salt concentrations. Protein-DNA crosslinks were reversed in ChIP elution  
990 buffer (1% SDS, 5 mM EDTA, 10 mM Tris HCl pH 8) + 2.5 ul of Proteinase K and  
991 incubated for 1 hour at 55°C and overnight at 65°C. Samples were phenol-chloroform  
992 extracted, resuspended in TE buffer and assessed by qPCR as a quality  
993 control. Libraries were prepared from 5-10ng of purified DNA, depending on  
994 availability of material, using NEBNext Ultra II DNA Library Prep Kit for Illumina kit and  
995 using NEBNext Multiplex Oligos for Illumina (Index Primers Set 2) according to  
996 manufacturer's instructions using 6-8 cycles of PCR. ChIP-seq libraries from one  
997 biological set (all ChIP libraries for both ethanol and  
998 IAA) were multiplexed and sequenced on the Illumina HiSeq2500 platform, 80bp  
999 single-end reads. Each biological set was sequenced on a separate run.

1000 Quality control of reads was performed using FASTQC. Reads were aligned to  
1001 the hg19 reference genome using Bowtie with 3 mismatches. Only replicate 1 of the  
1002 SA1 library was used. PCR duplicates were detected and removed using  
1003 SAMTOOLS. Bam files were imported into MISHA (v 3.5.6) and peaks were identified  
1004 using a 0.995 percentile. Peaks that overlapped in both replicates were  
1005 retained. Correlation plots of peaks across the genome from different ChIP libraries  
1006 were compared with log-transformed percentiles plotted as a smoothed scatter plot.  
1007 Comparison of peaks at regions of interest were carried out using deepTools (Version  
1008 3.1.0-2 REF). For input into deepTools, peak data was converted to bigwig format,  
1009 with a bin size of 500, using the UCSC bedGraphToBigWig package. The signal matrix  
1010 was calculated for a window 2,000 bp up- and down-stream of the region of interest,  
1011 missing data was treated as zero, and all other parameters were as default. Heatmaps  
1012 were generated within deepTools, with parameters as default.

1013

#### 1014 **Hi-C data and contact hotspots analysis.**

1015 Generating hotspots - Previously published Hi-C datasets derived from  
1016 RAD21<sup>mAC</sup> cells treated with ethanol or IAA<sup>8</sup> were analyzed as previously described  
1017 <sup>51</sup>. Custom R scripts were written to identify Hi-C hotspots, i.e. regions of Hi-C maps  
1018 with high contact frequency. To begin, for each chromosome, all contacts were  
1019 extracted and subsetted for only high scoring ( $\geq 60$ ) contacts between a band of 10e3

1020 – 70e6. Using KNN, for each high scoring contact, the 250 nearest neighbour contacts  
1021 were identified and subset for only the high-scoring neighbours. This created a list of  
1022 high scoring neighbours for each high scoring contact, where the first neighbour is the  
1023 contact itself with a distance of 0. This allowed the neighbour information to be  
1024 converted into edge information, thereby allowing high score fends contacts to be  
1025 grouped into cluster hotspots using the R package ‘igraph’. Hotspots that contained  
1026 less than the minimum number of high scoring fends (<100) were removed. The output  
1027 list of hotspots were represented as 2D intervals which contained high scoring  
1028 contacts. In total, 5539 hotspots were identified in EtOH and 759 in IAA Hi-C data.

1029       Creating aggregate plots - To calculate and visualise the contact enrichment at  
1030 hotspots in the EtOH and IAA Hi-C, we used the R package ‘shaman’. Firstly, we used  
1031 the function ‘shaman\_generate\_feature\_grid’ to calculate the enrichment profile at  
1032 EtOH and IAA hotspots. Using the weighted centre for each hotspot, represented as  
1033 a 2D interval we used the function to build grids for the EtOH and IAA hotspots in the  
1034 HiC data at 3 specific bands, 100k – 1MB, 1MB – 5MB, 5MB – 10MB. A range of  
1035 250kb was visualised around the weighted centre. The grid was built by taking all  
1036 combinations interval1 and interval2 of the EtOH and IAA hotspot centres, with each  
1037 combination termed a ‘window’. Hotspots were not filtered for size or shape. A score  
1038 threshold of 60 was used to focus on enriched pairs, those windows that did not  
1039 contain at least one point with a score of 60 were discarded. Each window was then  
1040 split into 1000nt bins and the windows were summed together to generate a grid  
1041 containing the observed and expected contacts. We visualised the grid using  
1042 ‘shaman\_plot\_feature\_grid’ using ‘enrichment’ mode and a plot\_resolution value of  
1043 6000, due to the large range being visualised.

1044

1045

#### 1046 **STORM – Immunolabelling and imaging.**

1047 Two clones of RAD21<sup>mAC</sup>-OsTIR cells were seeded at a density of 30,000 cells per  
1048 well per 400ul) onto poly-L-lysine coated 8-well chamber slides (Lab-Tek™ 155411)  
1049 overnight. Each clone was treated with either ethanol (EtOH) or Auxin (IAA) for  
1050 4hr and then fixed with PFA 4% (Alfa Aesar) for 10 min at room temperature and rinsed  
1051 with PBS three times for 5 min each. The cells were shipped to the Cosma Lab after  
1052 fixation for STORM processing and imaging. Cells were permeabilized with 0.3%  
1053 Triton X-100 in PBS and blocked in blocking buffer (10% BSA – 0.01 % Triton X-100  
1054 in PBS) for one hour at room temperature. Cells were incubated with primary  
1055 antibodies (see Table 2) in blocking buffer at 1:50 dilution. Cells were washed three  
1056 times for 5 min each with wash buffer (2% BSA – 0.01 % Triton X-100 in PBS) and  
1057 incubated in secondary antibody. For STORM imaging, home-made (Bates et al.,  
1058 2007) dye pair labeled secondary antibodies were added at a 1:50 dilution in blocking  
1059 buffer and were incubated for 45 min at room temperature. Cells were washed three  
1060 times for 5 min each with wash buffer.

1061 STORM imaging was performed on an N-STORM 4.0 microscope (Nikon)  
1062 equipped with a CFI HP Apochromat TIRF 100x 1.49 oil objective and an iXon Ultra  
1063 897 camera (Andor) and using Highly Inclined and Laminated Optical sheet  
1064 illumination (HILO). Dual color STORM imaging was performed with a double activator  
1065 and single reporter strategy by combining AF405\_AF647 anti-Goat secondary with  
1066 Cy3\_AF647 anti-Rabbit secondary antibodies. Sequential imaging acquisition was  
1067 performed (1 frame of 405 nm activation followed by 3 frames of 647 nm reporter and  
1068 1 frame of 560 nm activation followed by 3 frames of 647 nm reporter) with  
1069 10 ms exposure time for 120000 frames. 647 nm laser was used at constant ~2  
1070 kW/cm<sup>2</sup> power density and 405 nm and 560 nm laser powers were gradually increased  
1071 over the imaging. Imaging buffer composition for STORM imaging was 100 mM  
1072 Cysteamine MEA (Sigma-Aldrich, #30070) - 5% Glucose (Sigma-Aldrich, #G8270) –  
1073 1% Glox Solution (0.5 mg/ml glucose oxidase, 40 mg/ml catalase (Sigma-Aldrich,  
1074 #G2133 and #C100)) in PBS.

1075

### 1076 **STORM imaging analysis and quantifications.**

1077 STORM images were analyzed and rendered in Insight3 (kind gift of Bo Huang, UCSF)  
1078 as previously described (Bates et al., 2007; Rust et al., 2006). Localizations were  
1079 identified based on a threshold and fit to a simple Gaussian to determine the x and y  
1080 positions. Cluster analysis of CTCF, SA1 and SA2 STORM signal was performed as  
1081 previously described (Ricci et al., 2015) to obtain cluster size and positions and to  
1082 measure Nearest Neighbour distributions (NND) between clusters of the same protein  
1083 in individual nuclei. NND between clusters' centroids of two different proteins  
1084 (i.e. CTCF-SA1 and CTCF-SA2) was calculated by `knnsearch.m` Matlab function and  
1085 the NND histogram of experimental data was obtained by considering all the NNDs of  
1086 individual nuclei (histogram bin, from 0 to 500 nm, 5 nm steps). Simulated NNDs  
1087 recapitulating random spatial distribution of cluster centroids were first obtained for  
1088 each nucleus separately and then merged to calculate the simulated NND histogram  
1089 (histogram bin, from 0 to 500 nm, 5 nm steps). The difference plot reports the  
1090 difference between experimental NND and simulated NND. Quantification and  
1091 analysis of STORM images was performed in Matlab and statistical  
1092 analysis was performed in Graphpad Prism (v7.0e). The type of statistical test is  
1093 specified in each case. Statistical significance is represented as indicated above.

1094 Insight3 Software used for STORM image processing has been generated (Huang et  
1095 al., 2008) and kindly provided by Dr Bo Huang (UCSF). Graphpad Prism software  
1096 used for statistical analysis can be found at: [https://www.graphpad.com/scientific-  
1097 software/prism/](https://www.graphpad.com/scientific-software/prism/) MatLab software used for imaging data analysis can be found  
1098 at: <https://www.mathworks.com/products/matlab.html>

1099

### 1100 **Mass spectrometry sample preparation and running.**

1101 SA1 immunoprecipitation samples were analysed by liquid chromatography–tandem  
1102 mass spectrometry (LC-MS/MS). Three biological replicate experiments were carried

1103 out for MS and each included four samples, untreated (UT), treated with IAA for  
1104 4hrs, siCon, or siSA1, generated as described above. A fourth technical replicate was  
1105 also included for the UTR samples. Cells were fractionated to purify chromatin-bound  
1106 proteins as above and immunoprecipitated with IgG- or SA1-bead  
1107 conjugates. To maximise IP material for the MS, the antibody amount was increased  
1108 to 15ug and the chromatin amount was increased to 2mg.

1109 The IP eluates were loaded into a pre-cast SDS-PAGE gel (4–20% Mini-  
1110 PROTEAN® TGX™ Precast Protein Gel, 10-well, 50  $\mu$ L) and proteins were run  
1111 approximately 1 cm to prevent protein separation. Protein bands were excised and  
1112 diced, and proteins were reduced with 5 mM TCEP in 50 mM triethylammonium  
1113 bicarbonate (TEAB) at 37°C for 20 min, alkylated with 10 mM 2-chloroacetamide in 50  
1114 mM TEAB at ambient temperature for 20 min in the dark. Proteins were then digested  
1115 with 150ng trypsin, at 37°C for 3 h followed by a second trypsin addition for 4 h, then  
1116 overnight at room temperature. After digestion, peptides were extracted with  
1117 acetonitrile and 50 mM TEAB washes. Samples were evaporated to dryness at 30°C  
1118 and resolubilised in 0.1% formic acid.

1119 nLC-MS/MS was performed on a Q Exactive Orbitrap Plus interfaced to a  
1120 NANOSPRAY FLEX ion source and coupled to an Easy-nLC 1200 (Thermo Scientific).  
1121 25% (first, second and fourth biological replicate) or 50% (third biological replicate) of  
1122 each sample was loaded as 5 or 10  $\mu$ L injections. Peptides were separated on a 27cm  
1123 fused silica emitter, 75  $\mu$ m diameter, packed in-house with Reprosil-Pur 200 C18-AQ,  
1124 2.4  $\mu$ m resin (Dr. Maisch) using a linear gradient from 5% to 30% acetonitrile/ 0.1%  
1125 formic acid over 60 min, at a flow rate of 250 nL/min. Peptides were ionised by  
1126 electrospray ionisation using 1.8 kV applied immediately prior to the analytical column  
1127 via a microtee built into the nanospray source with the ion transfer tube heated to  
1128 320°C and the S-lens set to 60%. Precursor ions were measured in a data-dependent  
1129 mode in the orbitrap analyser at a resolution of 70,000 and a target value of 3e6 ions.  
1130 The ten most intense ions from each MS1 scan were isolated, fragmented in the HCD  
1131 cell, and measured in the orbitrap at a resolution of 17,500.

1132

### 1133 **Mass spectrometry analysis**

1134 Raw data was analysed with MaxQuant<sup>52</sup> version 1.5.5.1 where they were searched  
1135 against the human UniProtKB database using default settings  
1136 (<http://www.uniprot.org/>). Carbamidomethylation of cysteines was set as fixed  
1137 modification, and oxidation of methionines and acetylation at protein N-termini were  
1138 set as variable modifications. Enzyme specificity was set to trypsin with maximally 2  
1139 missed cleavages allowed. To ensure high confidence identifications, PSMs, peptides,  
1140 and proteins were filtered at a less than 1% false discovery rate (FDR). Label-free  
1141 quantification in MaxQuant was used with LFQ minimum ratio count set to 2 with  
1142 'FastLFQ' (LFQ minimum number of neighbours = 3, and LFQ average number of  
1143 neighbours = 6) and 'Skip normalisation' selected. In Advanced identifications,  
1144 'Second peptides' was selected and the 'match between runs' feature was not



1145 selected. Statistical protein quantification analysis was done in MSstats<sup>53</sup> (version  
1146 3.14.0) run through RStudio. Contaminants and reverse sequences were removed  
1147 and data was log<sub>2</sub> transformed. To find differential abundant proteins across  
1148 conditions, paired significance analysis consisting of fitting a statistical model and  
1149 performing model-based comparison of conditions. The group comparison function  
1150 was employed to test for differential abundance between conditions. Unadjusted p-  
1151 values were used to rank the testing results and to define regulated proteins between  
1152 groups.

1153 Proteins with peptides discovered in the IgG samples were disregarded from  
1154 downstream analyses. Significantly depleted/enriched proteins were considered with  
1155 an absolute log<sub>2</sub>foldchange > 0.58 (1.5-fold change) and a p-value < 0.1. SA1  
1156 interactome analysis was performed in STRING. The network was generated as a full  
1157 STRING network with a minimum interaction score of 0.7 required. Over-enrichment  
1158 of GO biological process and molecular function terms was calculated with the human  
1159 genome as background. Network analysis of the SA1 interactome in IAA-treated  
1160 samples was generated from the significantly depleted/enriched proteins, with a  
1161 minimum interaction score of 0.4 required. Two conditions for functional enrichments  
1162 were considered; i) enrichment was calculated with the human genome as background  
1163 to determine the full SA1 interactome in the absence of cohesin, compared to the  
1164 genome, and ii) enrichment was calculated with the untreated SA1 interactome as  
1165 background, to determine the statistical effect of cohesin loss of the SA1 interactome  
1166 itself. The network developed in i) was manually rearranged in Cytoscape for visual  
1167 clarity, enriched categories were visualized using the STRING pie chart function and  
1168 half of the proteins within each category were subset from the network based on  
1169 pvalue change between UTR and IAA samples.

1170 Over-enrichment of the s9.6 interactome was calculated separately using the  
1171 hypergeometric distribution for comparison with<sup>34,35</sup>. Significance was calculated  
1172 using the dhyper function in R and multiple testing was corrected for using the p.adjust  
1173 Benjamini & Hochberg method. To compare with a minimal background protein list,  
1174 <http://www.humanproteomemap.org> was analysed on the Expression Atlas database  
1175 to determine a list of proteins expressed in one or more of three tissue types  
1176 corresponding to the cell types used across the different studies.

1177

1178

### 1179 **SLiMSearch analysis**

1180 The SLiMSearch tool <http://slim.icr.ac.uk/slimsearch/>, with default parameters was  
1181 used to search the human proteome for additional proteins that contained the FGF-  
1182 like motif determined in<sup>16</sup> to predict binding to SA proteins. The motif was input as  
1183 [PFCAVIYL][FY][GDEN]F.{0,1}[DANE].{0,1}[DE]. Along with CTCF, four proteins  
1184 found to contain the FGF-like motif, CHD6, MCM3, HNRNPUL2 and ESYT2 were  
1185 validated for interaction with SA.

1186

1187

## 1188 **CLIP and iCLIP**

1189 Crosslinking immunoprecipitation (CLIP) was performed as previously described<sup>54</sup>.  
1190 Briefly, mESC or HCT116 cells were irradiated with 0.2 J/cm<sup>2</sup> of 254 nm UV light in a  
1191 Stratalinker 2400 (Stratagene). Cells were lysed in 1 ml of lysis buffer with Complete  
1192 protease inhibitor (Roche). Lysates were passed through a 27 G needle, 1.6 U DNase  
1193 Turbo (ThermoFisher) per 10<sup>6</sup> cells and 0.8 (low) or 8 U (high) U RNase I (Ambion) per  
1194 10<sup>6</sup> cells added, and incubated in a thermomixer at 37°C and 1100 rpm for 3 minutes.  
1195 Lysates were then cleared by centrifugation and using Proteus clarification spin  
1196 column, according to the manufacturer's instructions. Endogenous SA1 and SA2 were  
1197 immunoprecipitated with 10  $\mu$ g SA1 and SA2 antibodies or non-specific IgG control  
1198 (Sigma) conjugated to protein G dynabeads (Dyna) for 4 hrs at 4°C. Tagged SA2  
1199 proteins were immunoprecipitated from HCT116 cells 40 hours after transfection with  
1200 30  $\mu$ l GFP-Trap beads. IPs were washed three times with high salt buffer (containing  
1201 1M NaCl and 1M urea) and once with PNK buffer and RNA labelled with 8  $\mu$ l  
1202 radioactive <sup>32</sup>P-gamma-ATP (Hartmann Analytic) for 5 mins at 37°C. For RNaseH1  
1203 treatment, YFP-SA2 samples were split and either treated with PNK buffer alone or  
1204 PNK buffer containing 50 U RNaseH1 for 15 mins at 37°C. RNPs were eluted in LDS  
1205 loading buffer (Invitrogen) and resolved on a 4-12% gradient NuPAGE Bis-Tris gel  
1206 (Invitrogen) and transferred onto 0.2  $\mu$ m diameter pore nitrocellulose membrane. After  
1207 blocking with PBST+milk, membranes were washed and exposed overnight to  
1208 phosphorimager screen (Fuji) and RNA-<sup>32</sup>P visualized using a Typhoon  
1209 phosphorimager (GE) and ImageQuant TL (GE). Membranes were then  
1210 immunoblotted for SA1, SA2, and RAD21 and visualized using an ImageQuantLAS  
1211 4000 imager (GE). See Table 2 for details on antibodies.

1212

## 1213 **GFP-TRAP + Cloning of STAG2 s/l and YFP constructs.**

1214 SA2 cDNAs were cloned directly from HCT116 cells by PCR using KAPA  
1215 HiFi HotStart PCR kit (Roche) (Fwd: ATGATAGCAGCTCCAGAAAACCAACTG; Rev:  
1216 TTAAAACATTGACACTCCAAGAACTGATTCATCC). Two major isoforms were  
1217 detected, SA2 <sup>$\Delta$ ex32</sup> where exon32 has been spliced out and SA2<sup>+ex32</sup> where exon  
1218 32 has been spliced in. Both SA2 cDNAs were cloned into pENTR/D vector  
1219 (Invitrogen) and then into an N-terminal YFP-tagged Gateway cloning vector (a kind  
1220 gift from Endre Kiss-Toth, University of Sheffield). Sequences were confirmed by  
1221 restriction enzyme digestion and Sanger sequencing. Recombinant YFP-SA2 <sup>$\Delta$ ex32</sup> or  
1222 YFP-SA2<sup>+ex32</sup> were transfected into adherent HCT116 cells for 40 hours before being  
1223 harvested. Cells were lysed, fractionated and sonicated following the same protocol  
1224 for chromatin fractionation with the variation of chromatin solubilisation in NaCl IP  
1225 buffer (50mM Tris-HCL pH 7.5, 150mM NaCl, 1mM EDTA, 0.1% NP-40, 20% Glycerol,  
1226 1mM DTT). 1mg chromatin lysate was pre-cleared with a 50:50 mixture of protein A/G  
1227 magnetic beads and GFP-Trap (Chromotek, gtd-20) was pre-blocked with 1mg/mL  
1228 ultra-pure BSA (AM2616, Invitrogen) for 2h at 4°C. After blocking, GFP-Trap was

1229 washed twice with NaCl IP buffer and added to pre-cleared lysates to  
1230 immunoprecipitate proteins for 1h at 4°C. Samples were washed in NaCl IP buffer and  
1231 eluted in 2x Laemmli buffer (Bio-Rad). Proteins were separated by SDS-PAGE on a  
1232 4-20% gradient mini-PROTEAN® Precast Gel (Bio-Rad) and transferred onto PVDF  
1233 membrane for visualization.

1234

### 1235 **VAST-TOOLS**

1236 VAST-TOOLS was used to generate Percent Spliced In (PSI) scores, a statistic which  
1237 represents how often a particular exon is spliced into a transcript using the ratio  
1238 between reads which include and exclude said exon. Paired-end RNA-seq datasets  
1239 were submitted to VAST-TOOLS (v2.1.3) using the Mmu genome (Tapial J et al, Gen  
1240 Res 2017). Briefly, reads are split into 50nt words with a 25nt sliding window. The 50nt  
1241 words are aligned to a reference genome using Bowtie to obtain unmapped reads.  
1242 These unmapped reads are then aligned to a set of predefined exon-exon junction  
1243 (EJJ) libraries allowing for the quantification of alternative exon events. The output  
1244 was further interrogated using a script which searches all hypothetical EEJ  
1245 combinations between potential donors and acceptors within Stag1. PSI scores could  
1246 be obtained providing there was at least a single read within the RNAseq data that  
1247 supported the event, although we only considered events supported by a minimum  
1248 of 50 reads. Calculated PSI values for each alternatively spliced exon (and shown in  
1249 Fig 3d), as well as the average PSI reported in the text are shown below. See  
1250 Table 3 for names of published datasets used in this analysis.

1251

| <b>Dataset</b> | <b>SA2<br/>e32 PSI</b> | <b>Reads across junction</b> | <b>SA1<br/>e31 PSI</b> | <b>Reads across junction</b> |
|----------------|------------------------|------------------------------|------------------------|------------------------------|
| ENCODE HCT     | 21.92                  | 202.98                       | 98.99                  | 588                          |
| Zuo HCT        | 19.18                  | 94.75                        | 97.91                  | 278.06                       |
| ENCODE HeLa    | 19.95                  | 90.57                        | 96.36                  | 156.1                        |
| <b>AVG</b>     | <b>20.35</b>           |                              | <b>97.75</b>           |                              |

1252

1253



1254 **Table 1. siRNAs used in this study.**

| siRNA name           | Company   | Target     | Catalogue no.    | custom siRNA sequence                                                                                                       |
|----------------------|-----------|------------|------------------|-----------------------------------------------------------------------------------------------------------------------------|
| si scramble control  | Dharmacon | Smartpool  | D-001810-10-05   |                                                                                                                             |
| siSA1                | Dharmacon | Smartpool  | L-010638-01-0010 |                                                                                                                             |
| siSA2                | Dharmacon | Smartpool  | L-021351-00-0010 |                                                                                                                             |
| siNIPBL              | Dharmacon | Smartpool  | L-012980-00-0010 |                                                                                                                             |
| siAQR                | Dharmacon | Smartpool  | L-022214-01-0005 |                                                                                                                             |
| siControl (scramble) | Dharmacon | Smartpool  | D-001810-10-20   |                                                                                                                             |
| esi control          | Sigma     | Luciferase | EHUFLUC          |                                                                                                                             |
| esi SA1              | Sigma     | exon 31    | custom esiRNA    | TCCTCAGATGCAGATCTCTTGGTTAGGCC<br>AGCCGAAGTTAGAAGACTTAAATCGGAAG<br>GACAGAACAGGAATGAACTACATGAAAGTG<br>AGAAGTGGAGTGAGGCATGCTGT |
| esi SA2              | Sigma     | exon 32    | custom esiRNA    | CACGCAGGTAACATGGATGTTAGCTCAAAG<br>ACAACAAGAGGAAGCAAGGCAACAGCAGG<br>AGAGAGCAGCAATGAGCTATGTTAAACTG<br>CGAACTAATCTTCAGCATGCCAT |

1255

1256

1257

**Table 2. Antibodies used in this study.**

| Protein  | Company                | Catalogue No. | Species | Figure References                             |
|----------|------------------------|---------------|---------|-----------------------------------------------|
| SA1      | Abcam                  | ab4455        | mouse   | 1a, c, d, e, 2a, b, d, 3a, b, e, 4b, c, e, 5d |
| SA1      | Abcam                  | ab4457        | mouse   | 1i                                            |
| SA2      | Bethyl                 | A300-159      | goat    | 1b, c, d, e, 2a, 3a, b, f, 4c, e, 5d          |
| SA2      | Bethyl, AbVantage Pack | A310-941A     | goat    | 1i                                            |
| CTCF     | Diagenode              | C15410210     | rabbit  | 1c, d, i, 2a                                  |
| CTCF     | Cell signalling        | 2899s         | rabbit  | 1a, e                                         |
| Rad21    | Abcam                  | ab992         | rabbit  | 1c, d, i, 2a, d, 5b, d, f                     |
| GFP-TRAP | ChromoTek              | gtd-20        |         | 1i, 3g                                        |
| GFP      | Invitrogen             | A11122        | rabbit  | 1a, e                                         |
| mAID     | MBL                    | M214-3        | mouse   | S1a                                           |
| OstIR    | MBL                    | PD048         | rabbit  | S1a                                           |
| Smc3     | Abcam                  | ab9263        | rabbit  | 1i                                            |
| CHD6     | Bethyl                 | A301-221A     | rabbit  | 2a                                            |
| Mcm3     | Bethyl                 | A300-124A     | goat    | 2a, 4b                                        |
| HNRNPUL2 | Abcam                  | ab195338      | rabbit  | 2a                                            |
| YTHDC1   | Abcam                  | ab122340      | rabbit  | 2d                                            |
| FTSJ3    | Bethyl                 | A304-199A-M   | rabbit  | 2d                                            |
| FANCI    | Bethyl                 | A301-254A-M   | rabbit  | 2d                                            |
| TAF15    | Abcam                  | ab134916      | rabbit  | 2d                                            |
| DHX9     | Abcam                  | Ab26271       | rabbit  | 2d, 4b                                        |
| SSRP1    | Abcam                  | ab26212       | mouse   | 2d                                            |
| INO80    | Proteintech            | 18810-1-AP    | rabbit  | 2d                                            |
| ESYT2    | Sigma-Aldrich          | HPA002132     | rabbit  | 2d                                            |
| S9.6     | Kerafast               | ENH001        | mouse   | 4b, c, e, 5f                                  |
| RNase H2 | Novus                  | NBP1-76981    | rabbit  | 4b                                            |
| AQR      | Bethyl                 | A302-547A     | rabbit  | 4b, e, 5f                                     |
| Pol2     | Covance                | MMS-1289      | mouse   | 4b                                            |
| Mau2     | Abcam                  | ab183033      | rabbit  | 5b, d, f                                      |
| NIPBL    | Abbiotec               | 250133        | rat     | 5b, d, f, S5                                  |
| H3       | Abcam                  | ab1791        | rabbit  | 3e, f, 5b, d, f                               |

| Name (Secondary Abs) | Fluorophore | Company                                   | Catalogue No.              | Figure References |
|----------------------|-------------|-------------------------------------------|----------------------------|-------------------|
| Donkey anti-Rabbit   | Cy3_AF647   | Home made from Jackson ImmunoResearch IgG | Home made from 711-005-152 | 1e, S1            |
| Donkey anti-Goat     | AF405_AF647 | Home made from Jackson ImmunoResearch IgG | Home made from 705-005-147 | 1e, S1            |
| Donkey anti-mouse    | AF647       | Invitrogen                                | A31570                     | 1a, d, e          |
| Donkey anti-rabbit   | AF488       | Invitrogen                                | A21206                     | 1a, d, e          |
| Donkey anti-rabbit   | AF647       | Invitrogen                                | A31573                     | 1a, d, e          |
| Donkey anti-goat     | AF555       | Invitrogen                                | A21432                     | 1a, d, e          |
| Donkey anti-goat     | AF647       | Invitrogen                                | A21447                     | 1a, d, e          |

1258

1259

**Table 3. Published datasets used in this study.**

| Accession no. | Analysis description                                  | Publication DOI or Ref     | Figure Reference |
|---------------|-------------------------------------------------------|----------------------------|------------------|
| GSE104334     | Long-range contact analysis of Hi-C datasets          | 10.1016/j.cell.2017.09.026 | 1i               |
| GSE89729      | Percent Spliced In (PSI) analysis of RNA-seq datasets | 10.1172/jci.insight.91419  | 4d, "HCT Zuo"    |
| GSM958749     | Percent Spliced In (PSI) analysis of RNA-seq datasets | ENCODE HCT116 RNAseq       | 4d, "HCT ENCODE" |
| GSM958735     | Percent Spliced In (PSI) analysis of RNA-seq datasets | ENCODE HeLa RNAseq         | 4d, "HeLa"       |

1260



## Figure 2.

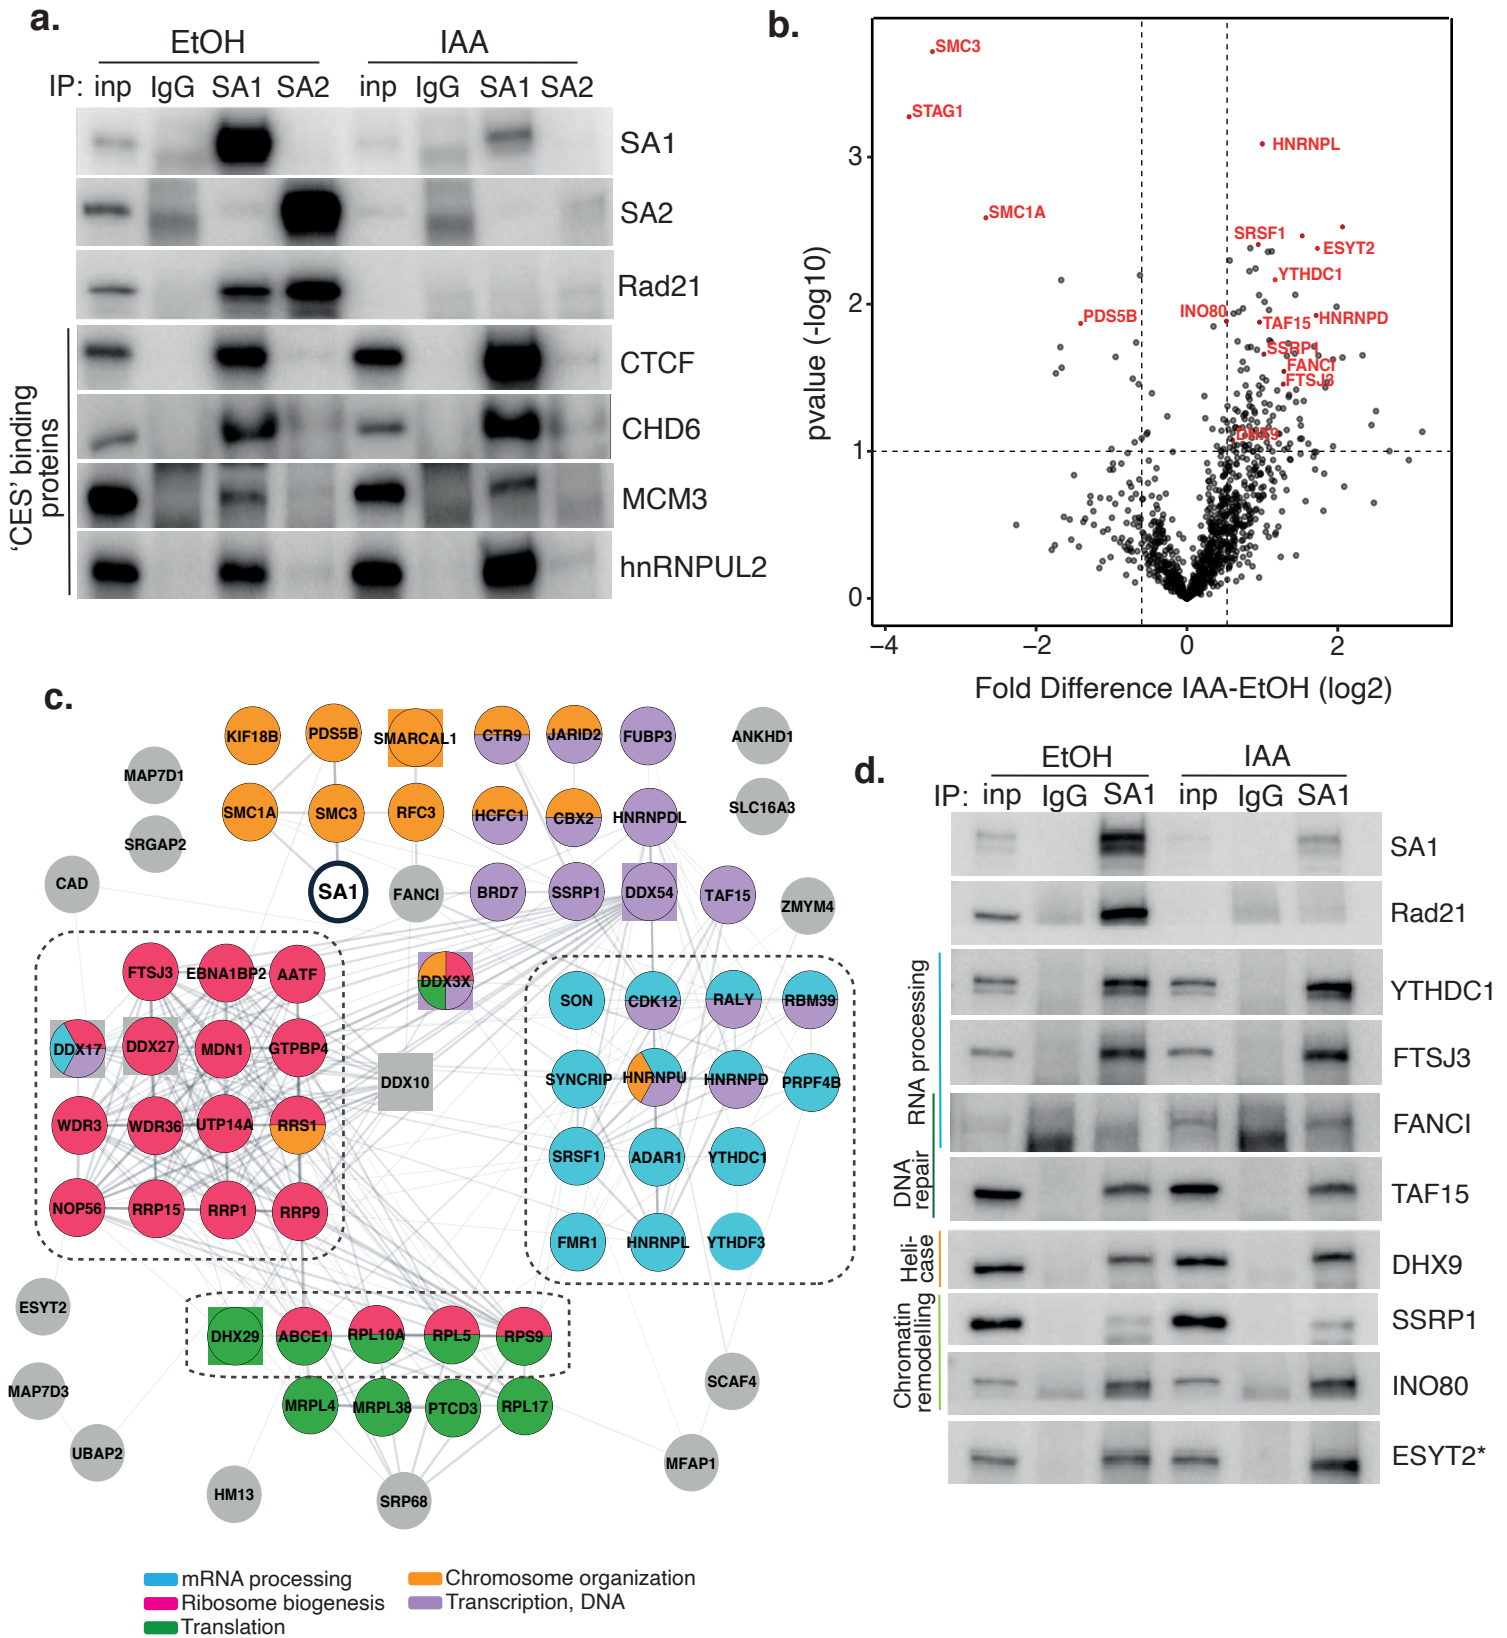

### Figure 3.

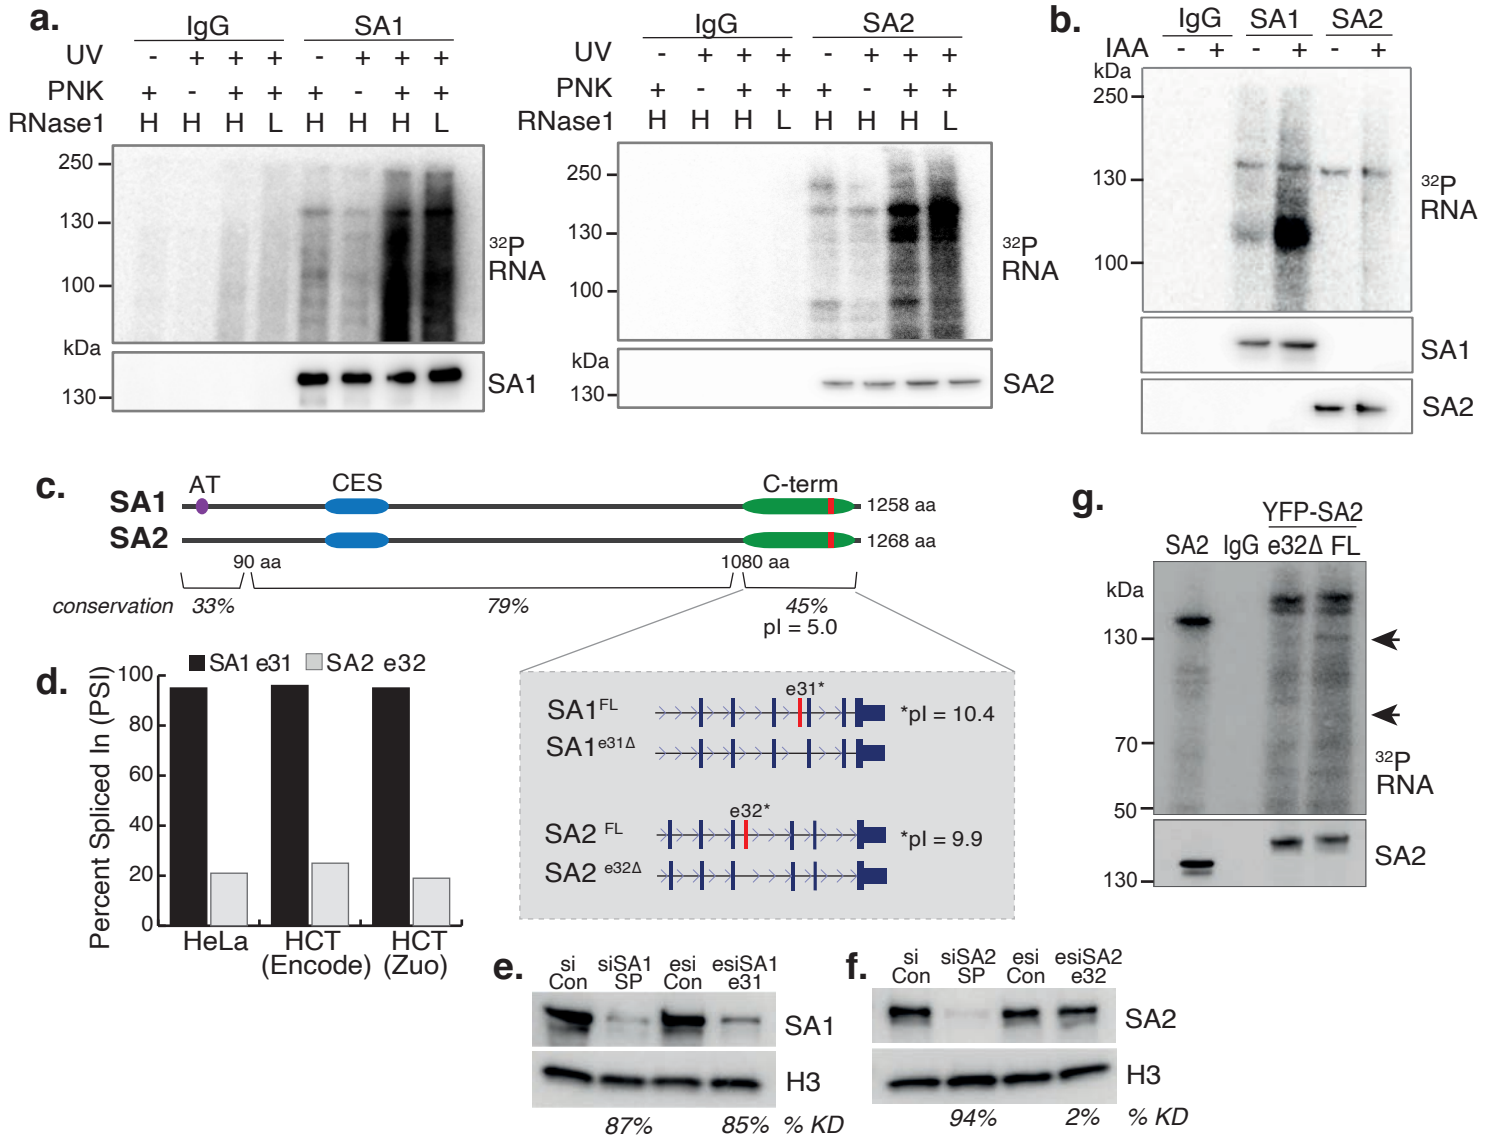



## Figure 4.

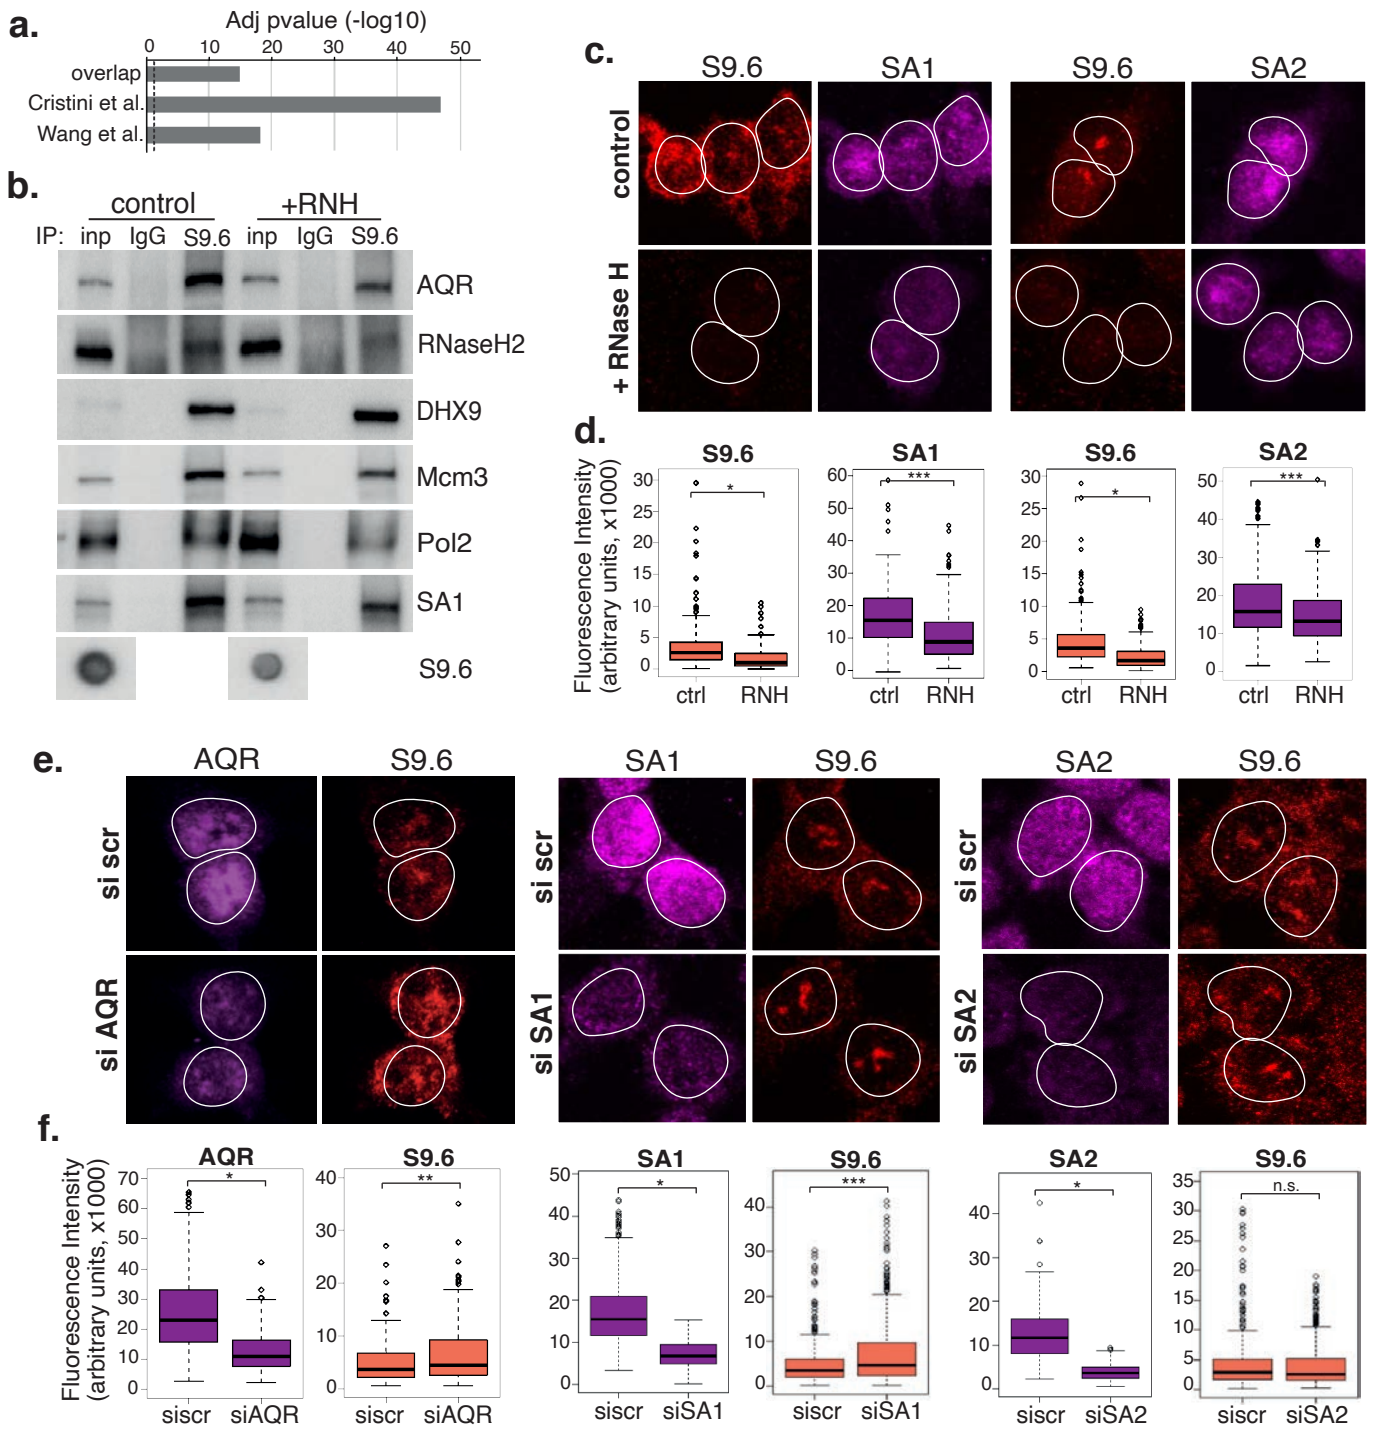



## Figure 5.

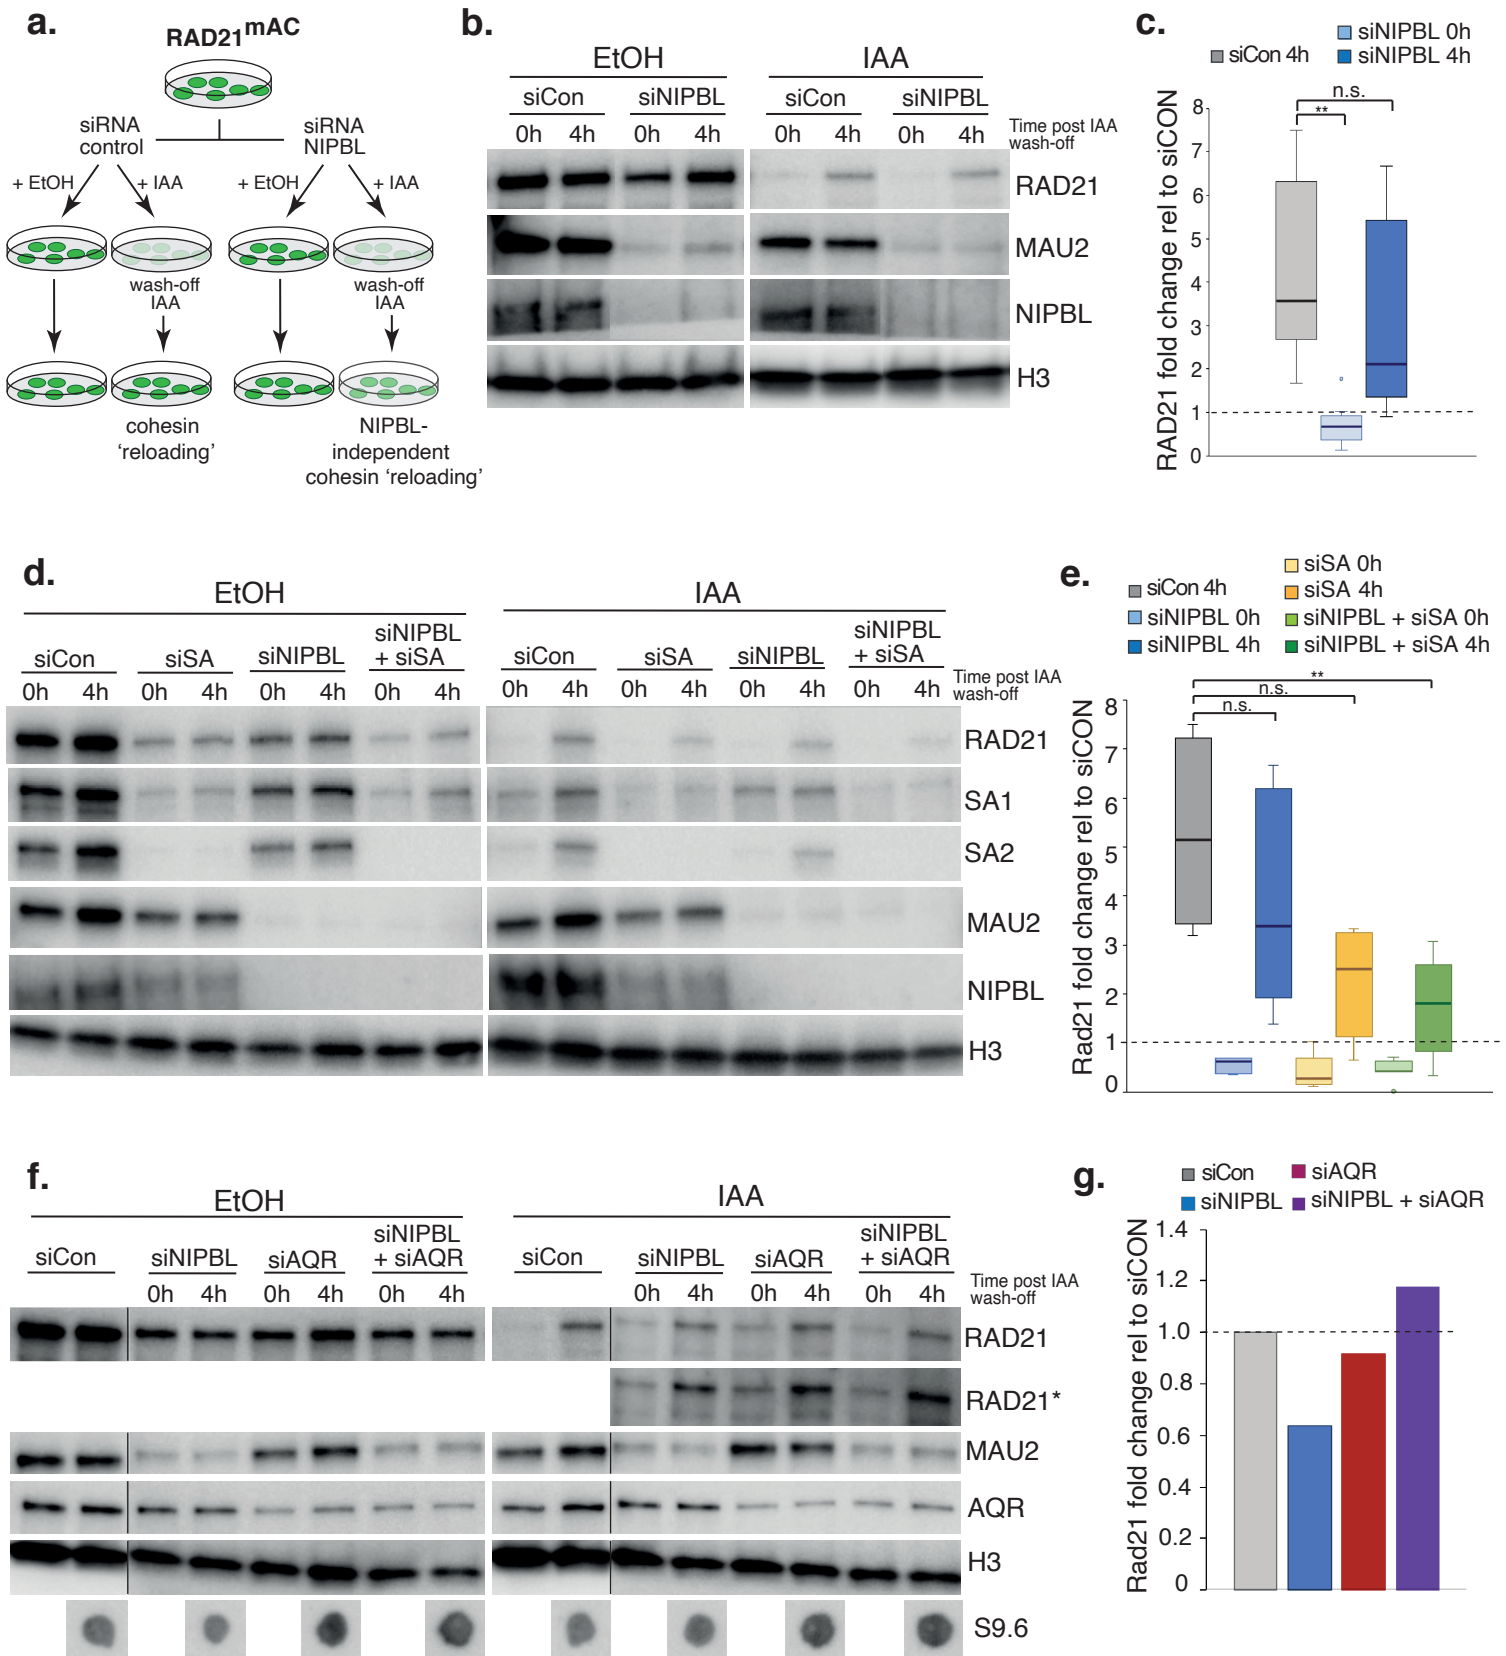

Source: https://www.biorxiv.org/content/10.1101/2021.02.20.432055v1.full.pdf
