## **Cohesin-independent STAG proteins interact with RNA and localise to R-loops to promote complex loading.**

Hayley Porter<sup>1+</sup>, Yang Li<sup>1+</sup>, Maria Victoria Neguembor<sup>2</sup>, Manuel Beltran<sup>3</sup>, Wazeer Varsally<sup>1</sup>, Laura Martin<sup>2</sup>, Manuel Tavares Cornejo<sup>3</sup>, Dubravka Pezic<sup>1</sup>, Amandeep Bhamra<sup>4</sup>, Silvia Surinova<sup>4</sup>, Richard G. Jenner<sup>3</sup>, Maria Pia Cosma<sup>2,5,6</sup>, Suzana Hadjur<sup>1\*</sup>

1 Research Department of Cancer Biology, Cancer Institute, University College London, 72 Huntley Street, London, United Kingdom

2 Centre for Genomic Regulation (CRG), The Barcelona Institute of Science and Technology, 08003 Barcelona, Spain.

3 Regulatory Genomics Group, Cancer Institute, University College London, London WC1E 6BT, United Kingdom

4 Proteomics Research Translational Technology Platform, Cancer Institute, University College London, 72 Huntley Street, London, United Kingdom

5 Universitat Pompeu Fabra (UPF), Dr Aiguader 88, 08003 Barcelona, Spain

6 Institució Catalana de Recerca i Estudis Avançats (ICREA), Pg. Lluís Companys 23, 08010 Barcelona, Spain.

+ These authors contributed equally

\* Correspondence: [s.hadjur@ucl.ac.uk](mailto:s.hadjur@ucl.ac.uk)

1 **ABSTRACT**

2

3 Most studies of cohesin function consider the Stromalin Antigen (STAG/SA) proteins  
4 as core complex members given their ubiquitous interaction with the cohesin ring.  
5 Here, we provide functional data to support the notion that the SA subunit is not a  
6 mere passenger in this structure, but instead plays a key role in the localization of  
7 cohesin to diverse biological processes and promotes loading of the complex at these  
8 sites. We show that in cells acutely depleted for RAD21, SA proteins remain bound to  
9 chromatin, cluster in 3D and interact with CTCF, as well as with a wide range of RNA  
10 binding proteins involved in multiple RNA processing mechanisms. Accordingly, SA  
11 proteins interact with RNA and are localised to R-loops where they contribute to R-  
12 loop regulation. Our results place SA1 within R-loop domains upstream of the cohesin  
13 complex and reveal a role for SA1 in cohesin loading which is independent of NIPBL,  
14 the canonical cohesin loader. We propose that SA1 takes advantage of structural R-  
15 loop platforms to link cohesin loading and chromatin structure with diverse functions.  
16 Since SA proteins are pan-cancer targets, and R-loops play an increasingly prevalent  
17 role in cancer biology, our results have important implications for the mechanistic  
18 understanding of SA proteins in cancer and disease.

19

20

21

22

23 **KEY WORDS**

24 Cohesin, STAG proteins, R-loops, genome organization.

## 25 INTRODUCTION

26 Cohesin complexes are master regulators of chromosome structure in interphase and  
27 mitosis. Accordingly, mutations of cohesin subunits lead to changes in cellular identity,  
28 both during development and in cancer <sup>1-3</sup>. A prevailing model is that cohesin  
29 contributes to cell identity changes in large part by dynamically regulating 3D genome  
30 organization and mediating communication between distal regulatory elements <sup>4-10</sup>.  
31 Molecular insight into how and when cohesin subunits become associated with  
32 chromatin and contribute to this function *in vivo* in human cells is still lacking under  
33 this model.

34 Most studies of cohesin function consider the Stromalin Antigen (STAG/SA)  
35 proteins as core complex members given their ubiquitous interaction with the tripartite  
36 cohesin ring (composed of SMC1, SMC3 and SCC1/RAD21). Rarely is the SA subunit  
37 considered for its roles independent of the cohesin ring, even though it is the subunit  
38 most commonly mutated across a wide spectrum of cancers <sup>1,11,12</sup>.

39 SA proteins contribute to cohesin's association with DNA <sup>13,14</sup>. The yeast SA  
40 orthologue is critical for efficient association of cohesin with DNA and its ATPase  
41 activation <sup>13,14</sup>. Separating interactions into SA-loader and cohesin ring-loader sub-  
42 complexes still impairs cohesin loading, indicating that SA functions as more than just  
43 a bridge protein <sup>14</sup>. Crystallisation studies reveal a striking similarity of SA with NIPBL  
44 (the canonical cohesin loader <sup>15</sup>), in that both are highly bent, HEAT-repeat containing  
45 proteins <sup>16,17</sup>. Of note, NIPBL and SA interact together and wrap around both the  
46 cohesin ring and DNA to position and entrap DNA <sup>18-20</sup>, implying a potential role for SA  
47 in the initial recruitment of cohesin to DNA alongside NIPBL. Further, SA proteins  
48 bridge the interaction between cohesin and CTCF <sup>18,21,22</sup>, and also bridge interactions  
49 with specific nucleic acid structures *in vitro* <sup>23,24</sup>.

50 Mammalian cells express multiple SA paralogs. SA1 binds to AT-rich telomeric  
51 sequences <sup>23,24</sup> and SA2 displays sequence-independent affinity for particular DNA  
52 structures commonly found at sites of repair, recombination, and replication <sup>25</sup>.  
53 Consistent with this, results in yeast implicate non-canonical DNA structures in  
54 cohesin loading in S-phase. *In vitro* experiments show that cohesin captures the  
55 second strand of DNA via a single-strand intermediate <sup>26</sup>, and chromatid cohesion is  
56 impaired by de-stabilisation of single-strand DNA intermediates during replication <sup>27</sup>.

57 Together, these suggest that SA proteins and DNA structures may play a regulatory  
58 role in guiding or stabilising cohesin localisations.

59 During transcription, the elongating nascent RNA can hybridise to the template  
60 strand of the DNA and form an R-loop, which is an intermediate RNA:DNA hybrid  
61 conformation with a displaced single strand of DNA<sup>28</sup>. A multitude of processes have  
62 been linked to R-loop stability and metabolism. For example, co-transcriptional RNA  
63 processing, splicing, and messenger ribonucleoprotein (mRNP) assembly counteract  
64 R-loop formation<sup>29,30</sup>. R-loop structures have also been shown to regulate  
65 transcription of mRNA by recruitment of transcription factors, displacement of  
66 nucleosomes, and preservation of open chromatin<sup>31,32</sup>. Hence, like at the replication  
67 fork, sites of active transcription accumulate non-canonical nucleic acid structures.

68 We set out to investigate the nature of SA proteins and cohesin loading to DNA.  
69 We discovered independent functions of the SA proteins, providing critical insight into  
70 the importance they play in their own right to direct cohesin's localization and loading  
71 to chromatin. In cells acutely depleted of RAD21, SA proteins remain associated with  
72 chromatin and CTCF where they are enriched at chromatin sites clustered in 3D.  
73 Moreover, we identify numerous, diverse cohesin-independent SA1 interactors  
74 involved in RNA processing, ribosome biogenesis, and translation. Consistent with  
75 this, SA1 and SA2 interact with RNA and non-canonical nucleic acid structures in the  
76 form of R-loops where SA1 suppresses R-loop formation. Importantly, SA proteins are  
77 required for loading of cohesin to chromatin in cells deficient for NIPBL. Our results  
78 highlight a central role for SA proteins in cohesin biology and the cohesin-independent  
79 interaction of SA proteins with RNA processing factors opens up a new understanding  
80 of how SA dysregulation can impact disease development that moves us beyond the  
81 control of chromatin topology for gene expression regulation.

## 82 RESULTS

83

### 84 SA interacts with CTCF on chromatin in the absence of the cohesin trimer.

85 To determine how CTCF and cohesin assemble on chromatin, we used previously  
86 described<sup>33</sup> human HCT116 cells engineered to carry a miniAID tag (mAID) fused to  
87 monomeric Clover (mClover) at the endogenous RAD21 locus and *OsTIR1* under the  
88 control of CMV (herein RAD21<sup>mAC</sup>). RAD21<sup>mAC</sup> cells were cultured in control EtOH  
89 conditions (EtOH) or in the presence of auxin (IAA) to induce rapid RAD21 degradation  
90 (Fig. S1a). Immunofluorescence (IF) was used to monitor the levels of mClover, SA1,  
91 SA2 and CTCF (Fig.1a, b, S1b). As reported<sup>33</sup>, acute IAA treatment dramatically  
92 reduced mClover levels compared to control cells (mean fluorescence intensity (MFI)  
93 reduction of 82%,  $p=2.9E-239$ ). SA proteins and CTCF were also all significantly  
94 reduced, however the extent of the change was notably different. We observed a small  
95 but significant reduction in CTCF signal upon IAA treatment (mean reduction of 16%,  
96  $p=1.6E-27$ ). This was similar to the mean SA1 signal which was reduced by 22%  
97 compared to EtOH control ( $p=3.5E-21$ ). However, SA2 levels mirrored more closely  
98 the effect on mClover, being reduced by 63% ( $p=1.9E-186$ ), but not completely lost  
99 (Fig.1b). The retention of SA proteins despite the degradation of RAD21 was  
100 surprising given the fact that they are considered to be part of a stable biochemical  
101 complex.

102 We sought to validate these observations using an orthogonal technique and to  
103 establish whether the residual SA proteins retained the capacity to directly interact  
104 with CTCF. We prepared chromatin extracts from RAD21<sup>mAC</sup> cells treated with EtOH  
105 or IAA and performed chromatin co-immunoprecipitation (coIP) to probe the  
106 interactions between SA proteins, RAD21 and CTCF. Both SA1 and SA2 interacted  
107 with RAD21 and CTCF in control cells as expected<sup>34,35</sup>, with notable differences in  
108 their preferred interactions (Fig.1c). SA2 more strongly enriched RAD21 while the  
109 SA1-CTCF interaction was significantly stronger than SA2-CTCF (Fig.1c), in line with  
110 previous results<sup>36</sup>. Upon RAD21 degradation, we again observed a stronger effect on  
111 chromatin-bound SA2 levels compared to SA1, suggesting that SA2 is more sensitive  
112 to cohesin loss than SA1. Residual SA proteins retained their ability to interact with  
113 CTCF in the absence of RAD21 and additionally, the interaction between SA1 and

114 CTCF was further enhanced (Fig.1c). Reciprocal colPs with CTCF confirmed the  
115 CTCF-SA interactions in RAD21-depleted cells, including the differences between  
116 SA1 and SA2 (Fig.1d). We validated these results in a second cell line and using  
117 siRNA-mediated knockdown (KD) of SMC3 (Fig. S1c). We also confirmed that  
118 approximately 20% of SA1 and SA2 were bound to chromatin without RAD21 even in  
119 unperturbed RAD21<sup>mAC</sup> HCT116 cells (Fig S1d), reminiscent of reports of SA1 without  
120 cohesin at telomeres<sup>23</sup>.

121 Next, we performed two-color Stochastic Optical Reconstruction Microscopy  
122 (STORM) to assess the nuclear distribution and co-localization of SA1, SA2 and CTCF  
123 with nanometric resolution in control and RAD21-degraded cells (Fig. 1e, S1e). In  
124 control RAD21<sup>mAC</sup> cells, we observed clustering of CTCF, SA1 and SA2 localizations  
125 as quantified by cluster analysis and nearest neighbor distance (NND) analysis of  
126 protein clusters<sup>37</sup>. SA1 and CTCF exhibited higher densities compared to SA2, with  
127 shorter distances between clusters (mean NND of 68.9, 65.3 and 78.9nm for CTCF,  
128 SA1 and SA2, respectively) (Fig 1f, g). Furthermore, we analyzed the relative  
129 distribution of SA clusters to CTCF clusters by assessing the NND distribution between  
130 SA1 and CTCF, and SA2 and CTCF. Both SA1 and SA2 exhibited significant co-  
131 localization with CTCF at short distances in RAD21<sup>mAC</sup> cells (Fig. 1h, S1f, g).

132 Upon IAA treatment, we observed a decreased density of detected SA1, SA2  
133 and CTCF in two analyzed clones (Fig.1e, f, S1e), suggesting that RAD21 degradation  
134 affects the stability of SA proteins and CTCF. As observed by conventional confocal  
135 microscopy (Fig. 1b), SA2 localizations were more affected than SA1 (mean density  
136 reduction in SA1, 32% and SA2, 42%). Accordingly, SA1, SA2 and CTCF clusters  
137 were more sparsely distributed across the nucleus upon RAD21 degradation (mean  
138 NND 81.1, 109.7 and 117.5 nm, respectively) with SA2 significantly more affected than  
139 SA1 (mean NND increase 24.3%, 39% respectively) (Fig.1g). SA proteins and CTCF  
140 remained co-localised upon RAD21 degradation as compared to both the control cells  
141 and to a simulation of randomly-distributed protein clusters at the same density (Fig.  
142 1h, S1f,g). Interestingly, while the probability of SA1 at CTCF is only modestly  
143 affected, SA2 at CTCF is more affected in IAA treated cells (Fig. 1h), in line with our  
144 previous observations. Together, our results confirm the maintained interaction and

145 spatial co-localization patterns of SA proteins with CTCF and reveal a difference in SA  
146 paralog stability in the absence of the core cohesin trimer.

147

### 148 **Cohesin-independent SA proteins are localised at clustered regions in 3D.**

149 Previous analyses of the contribution of SA proteins to genome organization <sup>7,9</sup> were  
150 performed in cells containing cohesin rings, possibly obscuring a functional role for SA  
151 proteins themselves in genome organization. To determine if cohesin-independent SA  
152 proteins may function at unique locations in the genome, we investigated whether the  
153 residual SA-CTCF complexes (herein, SA-CTCF<sup>ΔCoh</sup>) in IAA-treated RAD21<sup>mAC</sup> cells  
154 occupied the same chromatin locations as in control cells. Using chromatin  
155 immunoprecipitation followed by sequencing (ChIP-seq), we determined the binding  
156 profiles of CTCF, SA1, SA2, RAD21 and SMC3 in RAD21<sup>mAC</sup> cells treated with EtOH  
157 or IAA. Pairwise comparisons of CTCF ChIP-seq with RAD21 or SA in control  
158 RAD21<sup>mAC</sup> cells revealed the expected overlap in binding sites (Fig.1i, S1h). In  
159 contrast, both global and CTCF-overlapping RAD21 and SMC3 ChIP-seq signals were  
160 dramatically lost in IAA-treated cells (Fig.1i, S1h). In agreement with our microscopy  
161 and biochemistry results, we detected residual SA1 and SA2 binding sites in IAA-  
162 treated cells which retained a substantial overlap with CTCF (Fig.1i, S1h).  
163 Furthermore, the sites co-occupied by CTCF and SA proteins in RAD21-depleted cells  
164 (SA-CTCF<sup>ΔCoh</sup>) were also bound in control conditions, were enriched at TSSs and  
165 were characterised by active chromatin marks including phospho-S5 POLR2A,  
166 H3K4me3 and H3K27ac (Fig.S1h). Thus, CTCF and SA maintain occupancy at their  
167 canonical binding sites in the absence of RAD21 (Fig 1i), suggesting that SA  
168 interaction with CTCF in the absence of the cohesin ring is a step in normal cohesin  
169 activity.

170 While depletion of cohesin results in a dramatic loss of Topologically  
171 Associated Domain (TAD) structure <sup>8</sup>, the frequency of long-range inter-TAD, intra-  
172 compartment contacts (LRC) is increased <sup>5,8</sup>, and enriched for CTCF <sup>5</sup> or active  
173 elements <sup>8</sup>. To determine whether residual, chromatin-bound SA could be associated  
174 with LRCs in the absence of RAD21, we re-analysed Hi-C data from control and IAA-  
175 treated RAD21<sup>mAC</sup> cells <sup>8</sup>. We quantified all contacts within two different scales of  
176 genome organization; local TAD topology (100k-1Mb) and clustered LRCs (1-5Mb)

177 (Fig.1j). As previously shown <sup>8</sup>, local TAD contacts are lost and clustered LRCs are  
178 enriched in IAA conditions (Fig.1j). We probed the Hi-C datasets for contacts  
179 containing the residual SA-CTCF<sup>ΔCoh</sup> binding sites and observed a further enrichment  
180 in IAA conditions (Fig.1j, bottom right), indicating that SA-CTCF<sup>ΔCoh</sup> are enriched at  
181 the clustered LRCs formed when cells are depleted of cohesin and thus implicating  
182 them in 3D structural configurations. Our results suggest that cohesin-independent  
183 SA, either with CTCF or alone, may itself contribute to higher-order arrangement of  
184 active chromatin and regulatory features in 3D space.

185

### 186 **SA interacts with diverse ‘CES-binding proteins’ in cohesin-depleted cells.**

187 SA proteins contain a highly conserved domain known as the ‘stromalin conservative  
188 domain’ <sup>14,38</sup>, or the ‘conserved essential surface’ (CES). Structural analysis of CTCF-  
189 SA2-RAD21 has shown that a F/YXF motif in the N-terminus of CTCF engages with a  
190 composite binding surface containing amino acids from RAD21 and the CES of SA2,  
191 forming a tripartite interaction patch <sup>18</sup>. Further, the authors identified a similar F/YXF  
192 motif in other cohesin regulatory proteins, predicting interactions between the SA-  
193 RAD21 binding surface and additional chromatin proteins. To investigate whether SA  
194 proteins could associate with F/YXF-motif containing proteins beyond CTCF in the  
195 absence of RAD21 *in vivo*, we performed chromatin coIP with SA1 and SA2 in EtOH  
196 and IAA and probed for interaction with CTCF as before, and three additional F/YXF-  
197 motif containing proteins, CHD6, MCM3 and HNRNPUL2 (Fig. 2a, S2a). All of the  
198 proteins interacted with SA1 in RAD21-control cells and their interaction with SA1 was  
199 enriched upon RAD21-degradation, indicating that the association was not dependent  
200 on the amino acids contributed by RAD21 (Fig. 2a, S2b). Interestingly, despite SA2  
201 also containing the conserved CES domain, the F/YXF-motif proteins showed little  
202 interaction with SA2 (Fig. 2a, S2b), pointing to the presence of additional features in  
203 SA1 that stabilise its interaction with F/YXF containing proteins *in vivo*. Together, our  
204 results confirm that SA, in particular SA1, can interact with proteins beyond just CTCF  
205 and reveal that RAD21 is not required for the interaction between SA and F/YXF  
206 proteins *in vivo*. These results prompted us to re-evaluate the role of SA in cohesin  
207 activity and consider possible novel functions for these proteins.

208



209 **SA1 interacts with a diverse group of proteins in the absence of cohesin.**

210 To delineate novel protein binding partners and putative biological functions of  
211 cohesin-independent SA1, we optimised our chromatin-bound, endogenous SA1 co-IP  
212 protocol to be compatible with mass-spectrometry (IP-MS) and used this to  
213 comprehensively characterize the SA1 protein–protein interaction (PPI) network in  
214 control and RAD21-degraded RAD21<sup>mAC</sup> cells. Three biological replicates were  
215 prepared from RAD21<sup>mAC</sup> cells that were either untreated (UT) or treated with IAA (IAA)  
216 and processed for IP with both SA1 and IgG antibodies. In parallel, RAD21<sup>mAC</sup> cells  
217 were also treated with scrambled siRNAs or with siRNA to SA1 to confirm the  
218 specificity of putative interactors. Immunoprecipitated proteins were identified by liquid  
219 chromatography tandem mass spectroscopy (LC-MS/MS). SA1 peptides were  
220 robustly detected in all UT and siCON samples and never detected in IgG controls,  
221 validating the specificity of the antibody. We used a pairwise analysis of IAA vs UT  
222 SA1 samples to generate a fold-change value for each putative interactor. These  
223 candidates were changed by at least 1.5-fold compared to UT controls, and sensitive  
224 to siSA1, yielding 136 high-confidence interactors whose abundance was significantly  
225 altered with RAD21 loss (SA1<sup>ΔCoh</sup>) (Fig. 2b, Table S1). As expected, core cohesin  
226 subunits SMC1A and SMC3 were strongly depleted while no peptides were detected  
227 for RAD21 (Fig. 2b). SA1 itself was significantly depleted compared to control cells,  
228 as were other cohesin regulators, known to directly interact with SA1, such as PDS5B  
229<sup>39</sup>. In line with the enrichment we observed for the CES-binding proteins in IAA-  
230 conditions (Fig. 1c, 2a), the vast majority of the SA1<sup>ΔCoh</sup> interactors were enriched for  
231 binding with SA1 in IAA conditions (117 of 136), and represent the cohesin-  
232 independent SA1<sup>ΔCoh</sup> interactors (Fig. 2b).

233 We used STRING to analyse associations in the SA1<sup>ΔCoh</sup>-interactome and to  
234 identify enriched biological processes and molecular functions. We calculated  
235 enrichment relative to either the whole genome or to the SA1 interactome, which was  
236 determined in parallel from control cells (Fig. S2c), revealing similar enrichment terms  
237 to previously published cohesin interactomes<sup>40,41</sup>, and validating our approach.  
238 Compared to the whole genome background, processes enriched in the presence of  
239 cohesin were still enriched in the SA1<sup>ΔCoh</sup> PPI network and include a variety of  
240 functionally diverse cellular processes such as chromosome organization,

241 transcription, RNA processing, ribosome biogenesis, and translation (Fig. 2c, d).  
242 Within this group there are chromatin remodeling proteins (INO80 and SMARCA1)  
243 and several transcriptional and epigenetic regulators such as JARID2 and TAF15.  
244 Similar to our ChIP and colP results, this suggests that SA1 maintains interaction with  
245 proteins that localize with it in the presence of cohesin, albeit at different abundances.

246 RNA processing was the most enriched category in the SA1<sup>ΔCoh</sup> PPI network  
247 (FDR=3.62x10<sup>-39</sup>) and included proteins involved in RNA modification (YTHDC1,  
248 ADAR1, FTSJ3), mRNA stabilization and export (SYNCRIP, FMR1), and RNA splicing  
249 regulators (SRSF1, SON). We also found a significant enrichment for DNA and RNA  
250 helicases (FDR=3.54x10<sup>-08</sup>) as well as RNA binding proteins (FDR=9.11x10<sup>-11</sup>) within  
251 which were many HNRNP family members (HNRNPU, aka SAF-A). We also found a  
252 highly significant enrichment of proteins associated with ribosome biogenesis  
253 (FDR=2.20x10<sup>-30</sup>) including both large and small subunit components; rRNA  
254 processing factors and components of the snoRNA pathway (FDR=4.39x10<sup>-05</sup>).  
255 Finally, translation was significantly enriched as a biological process (p=1.64x10<sup>-06</sup>),  
256 with several cytoplasmic translation regulators identified as SA1<sup>ΔCoh</sup> interactors  
257 (DHX29, GCN1L1) (Fig. 2c, d, S2d, e). Among these is ESYT2 which is primarily found  
258 in the cytoplasm and contains a F/YXF-motif (Fig. 2c,d). We validated 8 of the highest-  
259 ranking proteins within the enriched functional categories described above in EtOH  
260 and IAA-treated RAD21<sup>mAC</sup> cells (Fig. 2d). Importantly, the enrichment of these  
261 proteins with SA1 in the IAA condition suggests that SA may have a role in these  
262 processes independently of the core cohesin complex.

263 Comparison of the SA1<sup>ΔCoh</sup> interactome with the SA1 interactome revealed that  
264 the proteins involved in RNA processing (FDR= 0.0298), ribosome biogenesis  
265 (0.0197), ribonucleoprotein complex biogenesis (0.0298) and rRNA processing  
266 (0.0409) were enriched with SA1 following IAA treatment compared to SA1 in the  
267 presence of RAD21 (Fig 2c, dotted lines). Overall, our results show that SA1<sup>ΔCoh</sup> PPIs  
268 contain not only transcriptional and epigenetic regulators, but are in fact predominantly  
269 enriched for proteins with roles in RNA processing and modification, ribosome  
270 biogenesis and translation pathways. Thus, SA1 is involved in several biological

271 processes and may facilitate an aspect of cohesin regulation at a variety of functionally  
272 distinct locations.

### 273 **SA proteins bind RNA independently of cohesin.**

274 Since RNA binding and RNA processing were among the most enriched categories in  
275 the SA1<sup>ΔCoh</sup> PPI network, we hypothesized that SA proteins may also bind RNA. We  
276 performed SA-crosslinking and immunoprecipitation (CLIP) in untreated RAD21<sup>mAC</sup>  
277 cells and found that both SA1 and SA2 directly bound RNA (Fig. 3a, b). This was  
278 evidenced by detection of RNPs of the expected molecular weights, with a smear of  
279 trimmed RNA, which was stronger in the +UV and +PNK conditions, increased as the  
280 RNaseI concentration was reduced, and which was lost after siRNA-mediated SA KD  
281 (Fig. S3a-c). We repeated the experiment in EtOH- and IAA-treated RAD21<sup>mAC</sup> cells  
282 to determine if the SA subunits can bind RNA in the absence of cohesin. As before,  
283 RAD21 depletion reduced SA1 and SA2 (Fig. S3d) and the amount of RNA crosslinked  
284 remained proportional to the amount of residual SA1 and SA2 protein (Fig. 3c, S3e),  
285 demonstrating that cohesin is not required for the interaction of these proteins with  
286 RNA in cells. Thus, cohesin-independent SA proteins interact with a wide array of RNA  
287 binding proteins (RBPs) as well as with RNA itself.

288

### 289 **SA proteins localise to endogenous R-loops in the absence of cohesin.**

290 Proteins involved in RNA processing, such as splicing, modification and export, act as  
291 regulators of R-loops<sup>42</sup>. Furthermore, R-loops accumulate at sites of multiple  
292 biological processes including transcription, DNA replication and DNA repair<sup>42</sup>. As  
293 many of these processes were enriched in the SA1 interactome, we reasoned that the  
294 diversity of biological processes represented in the SA1<sup>ΔCoh</sup> PPI network may be  
295 reflective of a role for SA proteins in R-loop biology.

296 We performed a number of experiments to investigate the localization of SA  
297 proteins at endogenous R-loops. First, we found a correlation between global SA and  
298 R-loop levels. We depleted endogenous R-loops by overexpressing ppyCAG-  
299 RNaseH-V5 in HCT116 cells. IF using the R-loop specific antibody S9.6 revealed that  
300 nuclear S9.6 levels were significantly reduced in cells which expressed V5 (38% of  
301 controls, p=0.04) and that mean SA1 signal was significantly reduced by 29% in the  
302 same cells (Fig. 3d). Furthermore, RAD21<sup>mAC</sup> cells treated with scramble control

303 siRNAs or Smartpool (SP) siRNAs to AQR (a known suppressor of R-loops<sup>43</sup>), SA1  
304 or SA2 revealed that S9.6 IF signal was significantly increased in siAQR and siSA1  
305 but not siSA2 cells compared to the siScr control (mean S9.6 signal increased by 28%,  
306  $p=0.0004$ ; 32%,  $p=3.90E-8$ ; reduced by 10%,  $p=0.17$ , respectively) (Fig. S3f).  
307 Although S9.6 signal was reduced by IF in RAD21<sup>mAC</sup> cells treated with IAA, this did  
308 not represent a significant change using this method (Fig. S3g).

309 We also performed STORM imaging on EtOH and IAA-treated RAD21<sup>mAC</sup> cells  
310 to assess the nuclear distribution of SA1 in the context of R-loops with and without  
311 RAD21. We measured the ratio of the SA1 signal inside and outside of the S9.6 signal  
312 mask. A ratio of 1 indicates a random distribution of SA1 with respect to S9.6 domains  
313 while a ratio above 1 reflects enrichment within S9.6 domains. In EtOH conditions,  
314 we did not detect enrichment of SA1 localizations, in fact SA1 was modestly depleted  
315 (mean ratio 0.93). However, upon IAA treatment, we observed a significant enrichment  
316 of SA1 localizations within S9.6 domains (mean ratio 1.24,  $p<0.0001$ ) (Fig. 3e),  
317 strongly suggesting that SA1 proteins are localized within R-loop domains  
318 independently of cohesin.

319 In addition, we returned to our IP-MS experiment to analyse enrichment of R-  
320 loop-associated proteins in our SA1<sup>ΔCoh</sup> interactome. We overlapped the proteins  
321 identified in two independent IP-MS experiments for R-loop interactors<sup>44,45</sup> to create  
322 a high-confidence 'R-loop interactome' and then used a hypergeometric distribution to  
323 determine the significance of this category in the SA1<sup>ΔCoh</sup> interactome (Methods). Both  
324 the custom R-loop interactome as well as proteins from the individual studies were  
325 highly over-enriched in the SA1<sup>ΔCoh</sup> interactome (FDR= $1.1 \times 10^{-15}$ ,  $1.4 \times 10^{-47}$ ,  $7.7 \times 10^{-19}$ ,  
326 respectively) (Fig. 3f). To directly measure this, we optimised a colP method using the  
327 S9.6 antibody in RAD21<sup>mAC</sup> cells (Fig. 3g, S3h). In agreement with published results,  
328 we found that S9.6 precipitated the known R-loop helicases AQR, DHX9, RNase H2  
329<sup>43,44</sup> as well as MCM3 and RNA Pol II (POLR2)<sup>46</sup>. Both SA1 and SA2 precipitated with  
330 S9.6 and treatment with RNase H (RNH) revealed the specificity of the S9.6-SA  
331 interactions since the reduction of R-loop signal was proportional to the observed  
332 reduction in colP of SA1 by S9.6 (Fig. 3g, S3h, i).

333 Finally, we used a high resolution, genome-wide method to detect R-loops in  
334 HCT116 cells. RAD21<sup>mAC</sup> cells were treated with RNH to confirm the specificity of our

335 method and with EtOH or IAA to assess the impact of cohesin loss on R-loops and  
336 subjected to DNA-RNA Immunoprecipitation coupled with sequencing (DRIP-seq)  
337 using the S9.6 antibody. We combined these datasets with our ChIP-seq for SA  
338 proteins, RAD21 and CTCF in EtOH or IAA conditions to confirm the associations  
339 described above. We detected 50,338 RNH-sensitive R-loop sites which were also  
340 sensitive to acute degradation of RAD21, albeit not to the same extent as RNH  
341 treatment (average S9.6 signal was reduced by 31.4% in RNH and 16.8% in IAA) (Fig.  
342 3h, i). Among the RNH-sensitive R-loop sites, we detected two regimes of SA-R-loop  
343 biology. A small proportion of R-loop sites directly overlapped with SA1/2, RAD21 and  
344 CTCF in control EtOH conditions. These sites were enriched at genes and both the  
345 SA1 and SA2 read density was sensitive to RAD21 loss (Fig. 3h, i, S3j, k). On the  
346 other hand, a larger proportion of R-loops had SA signals adjacent (bound within 2kb  
347 of the R-loop peak). Interestingly, these SA sites were enriched in repressed chromatin  
348 and were not sensitive to RAD21 loss, in fact their read density was enriched  
349 compared to EtOH conditions (Fig. 3h, i, S3j, k), reminiscent of the enrichment  
350 observed previously by STORM imaging (Fig. 3e).

351

### 352 **NIPBL-independent cohesin loading mediated by SA proteins.**

353 Our results thus far revealed that SA<sup>ΔCoh</sup> is localised to clustered regions, engages  
354 with RNA and various RBPs and is localised to R-loops hybrids. Several lines of  
355 evidence suggest that alongside the canonical NIPBL/Mau2 loading complex, SA  
356 proteins contribute to cohesin's association with chromatin<sup>13,14</sup> and that its functions  
357 may go beyond simply acting as a bridging protein<sup>14</sup>. Thus, we hypothesized that SA  
358 proteins support genome organization in their own right and herein facilitate cohesin's  
359 association with chromatin.

360 The RAD21<sup>mAC</sup> system has the advantage that when IAA is washed-off cells,  
361 the RAD21 protein is no longer degraded and can become 're-loaded' onto chromatin.  
362 We assessed this by measuring mClover signal intensity using IF and observed that it  
363 was robustly lost in IAA conditions and was partially restored to EtOH levels within 4hr  
364 of IAA withdrawal (Fig. 4a,b, S4a). We note the spatial distribution of RAD21 was itself  
365 variable, ranging between highly compartmentalised and randomly distributed (Fig.

366 4a, c). This provided a unique opportunity to assess how SA influences cohesin  
367 reloading *in vivo* and the potential role for RNA and R-loops in this process.

368 We assessed reloading using both single-cell and bulk methods, coupled with  
369 siRNA-mediated KD to determine how specific proteins affected cohesin reloading *in*  
370 *vivo*. We first measured the impact of the canonical cohesin loader, NIPBL. RAD21<sup>mAC</sup>  
371 cells were treated with scramble or NIPBL siRNAs and subsequently grown in EtOH  
372 or IAA. The '0h' and '4h' post EtOH/IAA wash-off samples represent the extent of  
373 cohesin *degradation* or *reloading*, respectively (Fig.S4b). Chromatin fractionation in  
374 high-salt conditions followed by immunoblot analysis confirmed the loss of the loader  
375 complex, NIPBL and MAU2 (known to become destabilised upon NIPBL loss<sup>47</sup>). As  
376 expected, in NIPBL KD conditions, mean RAD21 re-loading efficiency was reduced,  
377 although surprisingly, this was incomplete (41% of the siRNA controls; mean re-  
378 loading siNIPBL, 2.1 vs siCon, 3.6), and did not represent a statistically significant  
379 difference (p=0.33) (Fig. 4d, e, S4c). This result was reproduced using IF, where mean  
380 mClover signal in siNIPBL-treated cells was 45.1% of siRNA control (MFI siCON, 6563  
381 vs siNIPBL, 3602) (Fig 4g), indicating that cells can still load cohesin in the absence  
382 of NIPBL.

383 We reasoned that SA proteins may be contributing to the observed NIPBL-  
384 independent reloading. Thus, we repeated the experiments to include siRNA to SA1  
385 and SA2 together (siSA), and a siNIPBL+siSA condition. In both population and single  
386 cell analysis of reloading, SA KD had a more dramatic effect on cohesin re-loading  
387 efficiency than NIPBL KD, reducing RAD21 on chromatin to 51% of scramble controls  
388 (mean siSA, 1.9 vs siCon, 5.1, p=0.002 for Fig. 4f, S4d and MFI siSA,2303 p<0.0001  
389 for Fig. 4g). In the absence of both SA and NIPBL, cohesin reloading was reduced  
390 further (mean siNIPBL+siSA, 1.4 vs siCon, 5.1, p=0.001 for Fig. 4f, S4d and MFI  
391 siNIPBL+SA,1925 p<0.001 for Fig. 4g), indicating that SA performs an important and  
392 complementary step to NIPBL during normal reloading. Given the differences between  
393 SA1 and SA2 reported herein, we also performed the reloading experiment to separate  
394 the effects of SA1 and SA2. As expected from our co-IP results (Fig. 1c), RAD21 levels  
395 in RAD21<sup>mAC</sup> cells were more affected by siSA2 than siSA1 (Fig. S4e). We observed  
396 that cohesin reloading was more efficient in siSA2 (where SA1 is present) than in  
397 siSA1 (where only SA2 is present), and that siSA1 was similar in reloading to siSA

398 (Fig. S4e). Together these observations suggest that the bulk of the reloading in IAA  
399 conditions is supported by SA1.

400

#### 401 **SA proteins stabilize nascent RNA in the absence of cohesin.**

402 Given the association of SA proteins with RNA and RBPs and the dependence of  
403 cohesin reloading on SA1, we tested the requirement for RNA in cohesin reloading.  
404 Cells were treated as above with a pulse of 5 ethynyl uridine (EU) prior to collection.  
405 EU becomes actively incorporated into nascent RNA and can be measured by IF  
406 alongside the change in RAD21-mClover. While a significant reduction in nascent  
407 RNA signal was detected upon treatment with Triptolide (TRP), mClover signal was  
408 not significantly changed compared to IAA washoff conditions, indicating that RNA is  
409 not a key determinant of cohesin reloading *per se* (Fig 4h, left panel). However, we  
410 did observe an increase in nascent RNA upon acute RAD21 degradation which  
411 returned to EtOH levels when cohesin became reloaded onto chromatin (Fig 4h, right  
412 panel). These results pointed to the stabilization of nascent RNA in the absence of  
413 cohesin. Given the association of SA1<sup>ΔCoh</sup> with RNA and RBP, we repeated the  
414 experiment in siSA1 KD conditions. Again, we observed an increase in nascent RNA  
415 in IAA conditions compared to EtOH control, but this was no longer detected in cells  
416 treated with siRNA to SA1 (Fig. 4i). Our results point to a role for SA1 in the  
417 stabilization of nascent RNA in the absence of cohesin and a possible competition  
418 between SA-RNA and SA-cohesin associations.

419

420 Our results thus far showed that SA proteins remain chromatin associated in the  
421 absence of cohesin (Fig. 1), when they bind RBP (Fig. 2) and RNA and are localized  
422 to R-loops (Fig. 3). We also report that SA1 proteins contribute to cohesin's re-  
423 association with chromatin and that this involves nascent RNA (Fig. 4). Thus, we  
424 reasoned that SA may facilitate cohesin reloading at R-loops. It was technically  
425 challenging to measure reloading upon over-expression of ppyCAG-RNaseH. As an  
426 alternative, we used STORM imaging to assess the nuclear distribution of the reloaded  
427 cohesin in the context of R-loop clusters by comparing EtOH- and IAA-treated to IAA-  
428 washoff RAD21<sup>mAC</sup> cells (Fig. 4j). As before, we measured the ratio of signal (this time  
429 RAD21-mClover) inside and outside of the S9.6 mask. Interestingly, in EtOH

430 conditions, RAD21 localizations were depleted from the S9.6 domain (mean ratio 0.95)  
431 (Fig. 4j) similar to what we observed for SA1 (Fig 3h). Since STORM is such a  
432 sensitive approach, trace localizations of mClover will always be detected, even in IAA  
433 conditions when the bulk of the signal is lost. The few localizations we observed were  
434 indeed modestly enriched within the S9.6 mask, although these were not significantly  
435 different from EtOH (mean ratio 1.08,  $p=0.10$ ). These localizations may represent  
436 either extremely stable or freshly loaded cohesin. Upon IAA washoff, new RAD21-  
437 mClover molecules are readily detected, became significantly enriched within S9.6  
438 domains compared to EtOH treated cells (mean ratio 1.19,  $p=0.029$ ) and were  
439 sensitive to treatment with RNase H (mean ratio 0.98) (Fig 4j). Overall, our results  
440 point to a role for SA1 proteins in mediating reloading of cohesin at R-loops.

441

#### 442 **A basic exon in the C-terminus of SA2 tunes interactions with RBPs.**

443 While both SA1 and SA2 played a role in cohesin's reloading, SA1 was the dominant  
444 paralog (Fig S4e). In addition, SA2 was not able to compensate for SA1 in R-loop  
445 stability (Fig S3f), despite its interaction with RNA (Fig. 3a, b) and R-loops (Fig. S3h).  
446 Previous publications have described association of RBP from SA2 MS-IP in HCT  
447 cells<sup>40</sup>. Indeed, several of these RBPs overlap with the proteins described here as  
448 SA1 interactors (Fig. 2b, c) and are enriched in SA1 IP in IAA conditions (Fig. 2a, d).  
449 However, we did not observe robust enrichment of RBPs compared to input in SA2  
450 IP, in either EtOH or IAA conditions. This was reminiscent of the differential  
451 interactions between SA1 and SA2 with F/YXF containing proteins (Fig. 2a). These  
452 results thus raised the question of whether additional features in SA2 may be required  
453 to stabilize these interactions and functions.

454 SA1 and SA2 express transcript variants in RAD21<sup>mAC</sup> cells. We re-analysed  
455 publicly available RNA-seq datasets and quantified alternative splicing profiles using  
456 VAST-tools analysis<sup>48</sup>. One prominent variant [which is conserved between human  
457 and mouse \(Fig. S5a, b\)](#), arises from the alternative splicing of a single C-terminal  
458 exon, exon 31 in SA1 (SA1<sup>e31Δ</sup>) and exon 32 in SA2 (SA2<sup>e32Δ</sup>) (Fig. 5a). The  
459 significance of this is unknown. We found that in human HCT cells, the majority of  
460 SA1 mRNAs *include* e31 (average 'percent spliced in' (PSI) 97.7%), while the majority  
461 of SA2 mRNAs *exclude* e32 (average PSI 20.4%) (Fig. 5b, S5a, b). We confirmed  
462 this at the protein level by designing custom esiRNAs to specifically target SA1 e31 or



463 SA2 e32 (Methods). Smartpool (SP) KD reduced the levels of SA1 and SA2 to similar  
464 extents compared to scrambled controls (87% and 94%, respectively) (Fig. 5c).  
465 Specific targeting of SA1 e31 led to a reduction of 85% of SA1 compared to esiRNA  
466 control (which was comparable to SP KD). In contrast, SA2 e32 targeting had a  
467 minimal effect on SA2 protein levels compared to its esiRNA control (reduction of 2%)  
468 (Fig. 5c), in line with the PSI data (Fig. 5b) and indicating that the dominant SA2  
469 isoform does not contain e32.

470 These results imply that cells ‘tune’ the availability of e31/32 in SA proteins,  
471 prompting us to investigate the nature of these exons. Interestingly, the amino acid  
472 (aa) sequence of the spliced SA exons encode a highly basic domain within an  
473 otherwise acidic C-terminus (Fig. 5a, zoom-in). Overall, the SA paralogs are highly  
474 homologous, however the N- and C-termini diverge in their aa sequence. Despite this,  
475 e31 and e32 have retained their basic properties (pI=10.4 and 9.9, respectively)  
476 (Fig.5a, zoom-in). Basic patches can act as regulatory domains and bind nucleic acids  
477 prompting us to ask whether these alternatively spliced basic exons contribute to the  
478 association of SA proteins with RNA (Fig 3a). We cloned cDNAs from HCT116 cells  
479 representing the exon32-containing SA2 (SA2<sup>e32+</sup>) and the canonical exon32-lacking  
480 SA2 (SA2<sup>e32Δ</sup>), tagged them with YFP, expressed them in HCT116 cells and purified  
481 the tagged isoforms to compare their ability to interact with RNA (Fig. 5d) using CLIP.  
482 While the presence of e32 did not change the ability of SA2 to interact with RNA (Fig.  
483 5d, blue arrows), cells expressing the alternative exon routinely enriched RBPs with  
484 molecular weights ~110-140kDa (Fig 5d, black arrow), strongly suggesting that the  
485 e32 domain may act to stabilize the association of SA2 with RBPs.

486 To identify the proteins stabilized by the presence of e32, we coupled YFP-SA2  
487 isoform CLIP with Mass Spectrometry. Three biological replicate IPs were prepared  
488 from RAD21<sup>mAC</sup> cells that were transfected with either YFP-SA2<sup>e32+</sup> or YFP-SA2<sup>e32Δ</sup>.  
489 YFP IP efficiency for SA2<sup>e32+</sup> or SA2<sup>e32Δ</sup> was similar and both isoforms interacted with  
490 core cohesin subunits (Fig S5c). We identified a total of 238 proteins, the majority of  
491 which overlap in the two SA IPs and with a previously published SA2 IP<sup>40</sup> (Fig S5c,  
492 d). We used a pairwise analysis of SA2<sup>e32+</sup> vs SA2<sup>e32Δ</sup> samples to generate a fold-  
493 change value for each putative interactor (Fig 5e). GO analysis of proteins changed  
494 by at least 1.5-fold, and absent in Mock IP revealed a mild enrichment for post-

495 translational modification category from the SA2<sup>e32Δ</sup> IP (FDR=0.0234, p=1.35e-06),  
496 and conversely an enrichment of the RNA Binding category from SA2<sup>e32+</sup> (FDR=  
497 3.43E-05, p=6.56E-09). Interestingly, the enriched proteins included YTHDC1 and  
498 YTHDF3 (previously identified in the SA1<sup>ΔCoh</sup> interactome, Fig 2b), DIS3 and POLR2B,  
499 all known to play key roles in RNA-protein complexes and stability, have molecular  
500 weights ~110-140kDa and thus likely represent the specifically enriched band in the  
501 CLIP experiments (Fig 5d, black arrow). Finally, the observation that a basic exon 32  
502 domain in SA2 supports the stability of RNA-RBP interactions led us to investigate if  
503 exon 32 also stabilized SA2 at R-loops. We repeated the S9.6 IP in RAD21<sup>mAC</sup> cells  
504 expressing either YFP-SA2<sup>e32+</sup> or YFP-SA2<sup>e32Δ</sup>. As before, AQR and MCM3 were  
505 enriched by S9.6 IP (Fig. 5f) and we found that SA2<sup>e32+</sup> was more enriched in the S9.6  
506 IP compared to SA2<sup>e32Δ</sup> (enrichment of 1.8x and 1.24x respectively, relative to  
507 endogenous SA2) (Fig 5f, g). Taken together, our results support a role for the  
508 alternatively spliced C-terminal basic domain of SA in stabilizing interactions with  
509 RBPs and R-loops.

510

511

## 512 **DISCUSSION**

513 Whether SA proteins function in their own right outside of the cohesin complex is rarely  
514 considered. Consequently, our understanding of how these proteins contribute to  
515 cohesin function and disease is incomplete. In this study, we shed light on this  
516 question by uncovering a diverse repertoire of SA1 interactors in cells acutely depleted  
517 for the cohesin ring. This ranges from proteins associated with translation and  
518 ribosome biogenesis to RNA processing factors and regulators of  
519 the epitranscriptome. These observations suggest that SA1 has a previously  
520 unappreciated role in post-transcriptional regulation of gene expression which offers  
521 much-needed new insight into its roles in disease and cancer.

522 Acute depletion of the cohesin ring has allowed us to capture a moment in the  
523 normal life cycle of cohesin–DNA associations and unveiled a previously unknown  
524 step for SA proteins herein. We show that SA proteins, independent of the cohesin  
525 trimer, bind to DNA and RNA, either in the context of RNA:DNA hybrid structures, as  
526 we have shown here, or perhaps sequentially, and use this platform for the loading of

527 cohesin to chromatin. Our results are supportive of biophysical observations of SA  
528 proteins and R-loops<sup>49</sup> and *in vitro* assessment of cohesin loading at DNA  
529 intermediates<sup>26</sup>. These results point to the importance of DNA *structure*, as opposed  
530 to sequence, in the targeting of cohesin to chromatin. Furthermore, structural studies  
531 suggest that NIPBL and SA1 together bend DNA and cohesin to guide DNA entering  
532 into the cohesin ring<sup>19,20,50</sup>. Our work shows that in cells lacking either the canonical  
533 NIPBL/MAU2 loader complex or the SA proteins, cohesin can still associate with  
534 chromatin, suggesting that loading can occur with either component alone, albeit most  
535 effectively together.

536 Our results represent a new view onto the role of SA proteins in cohesin biology.  
537 Since SA paralogs have distinct terminal ends and nucleic acid targeting mechanisms  
538<sup>24,25</sup>, their recruitment to chromatin may be specified by unique DNA, RNA or protein-  
539 interactions, or indeed all three. Such diversification of loading platforms would be  
540 important in large mammalian genomes to ensure sufficient amounts of cohesin on  
541 chromatin or to stabilize cell-type specific chromatin structures<sup>51</sup>. Indeed, SA1 and  
542 SA2 show clear differences in interaction with F/YXF-motif containing proteins, despite  
543 the fact that both paralogs contain a CES domain<sup>52</sup>, underscoring the importance of  
544 investigating interactions *in vivo* and arguing that additional features play an important  
545 role in complex stabilization. In this context, RNA-associated protein interaction has  
546 previously been shown to support cohesin stabilisation at CTCF at the *IGF2/H19* locus  
547<sup>53</sup>. These results are in line with our findings that a basic domain in the unstructured  
548 C-terminal portion of SA supports RNA-associated protein interactions.

549 This study also reveals SA1 as a novel regulator of R-loop homeostasis. It is  
550 noteworthy that other suppressors of R-loop formation include RNA processing  
551 factors, chromatin remodellers and DNA repair proteins<sup>28</sup> which all function in the  
552 context of nuclear bodies<sup>54</sup>. We find that SA1 proteins are enriched at very distal  
553 chromatin interactions in cohesin-depleted Hi-C data, interact with numerous RBPs  
554 known to condense in 3D<sup>55,56</sup> and are enriched in S9.6 domains in cells where we find  
555 cohesin becomes associated with chromatin. Harnessing such condensates would  
556 provide an efficient loading platform for cohesin at sites of similar biological function.  
557 Yeast cohesin has been shown to mediate phase separated condensate structures<sup>57</sup>.  
558 Our results support this view and further suggest that it is SA (and possibly

559 predominantly SA1 in HCT116 cells), with its propensity for intrinsically disordered  
560 domains <sup>51</sup> that contribute to this formation, thereby linking cohesin loading to  
561 biological functions. We note that if SA paralogs or isoforms direct different localization  
562 of cohesin loading or stability of its association, this could have important implications  
563 in our understanding of disease where SA proteins are commonly mutated, such as in  
564 cancers.

565 **ACKNOWLEDGMENTS**

566 This work was supported by a Senior Research Fellowship from the Wellcome Trust  
567 awarded to S.H. (106985/Z/15/Z) and a CRUK PhD studentship awarded to H.P. The  
568 Proteomics work was supported by the CRUK–UCL Centre Award [C416/A25145].  
569 We are grateful to Jernej Ule for his support with DRIP-sequencing and to Julian  
570 Zagalak and the CRICK sequencing facility for reagents, advice and assistance. We  
571 thank Stanimir Dulev for his contributions at the early stages of the project and Jiten  
572 Manji for his support with microscopy. We also thank Konstantina Skourti-Stathaki for  
573 advice about S9.6 antibody, IFs and R-loops. We are grateful to the members of the  
574 Hadjur lab for critical discussions and reading of the manuscript.

575

576 **AUTHOR CONTRIBUTIONS**

577 H.P. and S.H. conceived the project. H.P. designed and performed the colIP, Mass  
578 spectrometry, DRIP-sequencing and cohesin re-loading experiments, analysed the  
579 ChIP, DRIP and Hi-C data and performed the statistical analysis for mass  
580 spectrometry with the support of A.B. and S.S. Y.L. performed and analysed all  
581 imaging experiments (apart from STORM), derived clonal lines of RAD21<sup>mAC</sup> cells,  
582 cloned YFP-tagged SA2 cDNAs and performed CLIP and CLIP-MS together with  
583 M.T.C. W.V. performed Hi-C, ChIP-seq and splicing analyses. M.V.N., L.M. and  
584 M.P.C. performed and analysed STORM imaging. D.P. discovered splicing features  
585 of the SA isoforms. H.P., Y.L. and M.B. prepared cellular materials for CLIP, which  
586 was carried out by M.B. and M.T.C. and supervised by R.G.J. A.B. and S.S. performed  
587 mass spectrometric and proteomic analysis. H.P., Y.L. and S.H. formatted all figures  
588 and wrote the manuscript with input from all authors.

589

590 **Accession Numbers**

591 Genomic data generated in this study (ChIP-seq) was submitted to GEO with the  
592 Accession GSE167887. The mass spectrometry proteomics data was deposited to the  
593 ProteomeXchange Consortium via the PRIDE partner repository with the dataset  
594 identifier PXD024354.

595

596 **Declaration of Interests**

597 The authors declare no competing interests.

598 **FIGURE LEGENDS**

599

600 **Figure 1. SA interacts with CTCF in the absence of cohesin.**

601 a) Representative confocal images of SA1 and CTCF IF in RAD21<sup>mAC</sup> cells treated  
602 with EtOH (EtOH) as a control or Auxin (IAA) for 4hrs. Nuclei were counterstained with  
603 DAPI.

604

605 b) Imaris quantification of the relative mean fluorescence intensity (MFI) of mClover,  
606 CTCF, SA1 and SA2 in EtOH and IAA-treated RAD21<sup>mAC</sup> cells. Whiskers and boxes  
607 indicate all and 50% of values, respectively. Central line represents the median.  
608 Asterisks indicate a statistically significant difference as assessed using two-tailed t-  
609 test. \*\*\*\* p<0.0001. n>50 cells/condition from 3 biological replicates.

610

611 Chromatin coIP of (c) SA1, SA2 and IgG with RAD21 and CTCF or (d) CTCF and  
612 IgG with RAD21, SA1 and SA2 in RAD21<sup>mAC</sup> cells treated with EtOH or IAA for  
613 4hrs. Input represents (c) 2.5% and (d) 1.25% of the material used for  
614 immunoprecipitation.

615

616 e) Dual-color STORM images of SA1 (green) and CTCF (magenta) in EtOH and IAA-  
617 treated RAD21<sup>mAC</sup> cells. Representative full nuclei and zoomed nuclear areas are  
618 shown. Line denotes 2 microns and 200nm for full nuclei and zoomed areas  
619 respectively. See Supplementary Figures for SA2 STORM images.

620

621 f) Mean CTCF, SA1 and SA2 localization densities (localizations normalized with  
622 nuclear area) in EtOH and IAA-treated RAD21<sup>mAC</sup> cells (n = >30, >17 and >15 nuclei  
623 for CTCF, SA1 and SA2 respectively). Mean and SD are plotted, Mann Whitney test.  
624 \*\* p<0.005, \*\*\* p<0.0005, \*\*\*\* p<0.0001.

625

626 g) Mean Nearest Neighbor Distance (NND) of CTCF, SA1 and SA2 clusters in  
627 nanometers in EtOH and IAA-treated cells (n = >38, >14 and >23 nuclei for CTCF,  
628 SA1 and SA2 respectively). Mean and SD are plotted, Mann Whitney test. \*\*\*\*  
629 p<0.0001.

630

631 h) NND distribution plot of the distance between CTCF and SA1 (left panel) or SA2  
632 (right panel) clusters in EtOH and IAA-treated cells. Experimental data are shown as  
633 continuous lines, random simulated data are displayed as dotted lines.

634

635 i) ChIP-seq deepTools heat map of CTCF, SA1, SA2, Rad21 and  
636 SMC3 binding profiles in control (EtOH) and IAA-treated RAD21<sup>mAC</sup> cells. Selected  
637 regions are bound by CTCF in control conditions.

638

639 j) Analysis of contact frequency hotspots from Hi-C libraries generated from EtOH-  
640 treated (top row) and IAA-treated (bottom row) RAD21<sup>mAC</sup> cells. Contact frequencies  
641 were calculated in two distance ranges of 100kb – 1Mb and 1-5Mb. The last column  
642 includes contact frequencies specifically at SA-CTCF<sup>ΔCoh</sup> binding sites.

643

644

645 **Figure 2. Characterization of SA1 protein-protein interaction network in RAD21-**  
646 **depleted cells.**

647 a) Chromatin coIP of SA1, SA2 and IgG with 4 predicted CES-binding proteins in  
648 RAD21<sup>mAC</sup> cells treated with EtOH or IAA for 4hrs. Input represents 1.25% of the  
649 material used for immunoprecipitation.

650  
651 b) Volcano plot displaying the statistical significance (-log<sub>10</sub> p-value) versus  
652 magnitude of change (log<sub>2</sub> fold change) from SA1 IP-MS data produced  
653 from untreated or IAA-treated RAD21<sup>mAC</sup> cells (n=3). Vertical dashed lines represent  
654 changes of 1.5-fold. Horizontal dashed line represents a pvalue of 0.1.  
655 Cohesin complex members and validated high-confidence proteins have been  
656 highlighted.

657  
658 c) SA1<sup>ΔCoh</sup> interaction network of protein-protein interactions identified in  
659 RAD21<sup>mAC</sup> cells using STRING. Node colours describe the major  
660 enriched categories, with squares denoting helicases. Proteins within each enrichment  
661 category were subset based on p-value change in B). See supplemental figures for  
662 full network. Dashed boxes indicate the proteins and categories which were  
663 specifically enriched in IAA-treatment compared to the SA1 interactome.

664  
665 d) Chromatin IP of SA1 and IgG in RAD21<sup>mAC</sup> cells treated with EtOH or IAA and  
666 immunoblotted with antibodies to validate the proteins identified by IP-MS. Input  
667 represents 1.25% of the material used for immunoprecipitation. \* We note that ESYT2  
668 is a F/YXF-motif containing protein.

669  
670

671 **Figure 3. SA proteins bind to RNA and localise to R-loops.**

672 a) CLIP for SA1, b) SA2 and IgG controls. Autoradiograms of crosslinked <sup>32</sup>P-labelled  
673 RNA are shown at the top and the corresponding immunoblots, below. CLIP was  
674 performed with and without UV crosslinking and polynucleotide kinase (PNK) and with  
675 high (H; 1/50 dilution) or low (L; 1/500 dilution) concentrations of RNase I.

676  
677 c) CLIP for SA1, SA2 and IgG control in EtOH (-) or IAA-treated (+) Rad21<sup>mAC</sup> cells.  
678 <sup>32</sup>P-labelled RNA and the corresponding immunoblots are shown as above.

679  
680 d) Top, Representative confocal images of S9.6 and SA1 IF in RAD21<sup>mAC</sup> cells  
681 untreated or overexpressing ppyCAG-RNaseH-v5. Expressing cells were identified with  
682 v5 staining. Nuclear outlines (white) are derived from DAPI counterstain. Bottom,  
683 Imaris quantification of the relative mean fluorescence Intensity (MFI) of S9.6 and  
684 SA1. Data are from two biological replicates with >75 cells  
685 counted/condition. Quantifications and statistical analysis were done as above.

686  
687 e) STORM analysis of localization density for SA1 in S9.6 masks in EtOH and IAA.  
688 Ratio of SA1 localizations inside and outside S9.6 masks is shown. Ratio of above 1  
689 represents an enrichment within the S9.6 domain. Mean and SD are plotted, statistics  
690 based on One-Way Anova test. Data are from two biological replicates.

691



692 f)  $-\log_{10}$  transformed adjusted p-value (FDR) for enrichment of S9.6 interactome data  
693 from Cristini et al. and Wang et al., with the SA1<sup>ΔCoh</sup> interactome. Overlap indicates  
694 the proteins identified in both of the S9.6 interactome datasets, representing a high  
695 confidence R-loop interactome list.

696

697 g) Chromatin colP of S9.6 and IgG in RAD21<sup>mAC</sup> cells treated with RNase H and  
698 immunoblotted with antibodies representing known R-loop proteins, as well as  
699 SA1. Input represents 1.25% of the material used for  
700 immunoprecipitation. Bottom, S9.6 dot blot of lysates used in colP.

701

702 h) deepTools heatmap of DRIP-seq and ChIP-seq from RAD21<sup>mAC</sup> cells. DRIP-seq  
703 was carried out in control (EtOH), RNase H (RNH) and IAA-treated cells. ChIP-seq  
704 was carried out for SA1, SA2, RAD21, CTCF and IgG in EtOH and IAA treated cells.  
705 Regions were selected based on DRIP-seq sensitivity to RNH and proximity with SA1  
706 ChIP-seq. BEDTools identified regions of overlap or adjacent SA1 co-binding.

707

708 i) Summary plots showing mean DRIP-seq (top) or ChIP-seq (bottom) read density  
709 across the regions from h), including sites of R-loop and SA 'overlap' (Left) or  
710 'adjacent' (right) regions. Input samples are indicated with dotted lines.

711

712

713 **Figure 4. SA proteins contribute to cohesin loading.**

714 a) Representative confocal images of immunofluorescence for mClover in EtOH, IAA  
715 and IAA washoff conditions. White lines denote nuclei based on DAPI staining.

716

717 b) Imaris quantification of the mean fluorescence intensity (MFI) of mClover in EtOH,  
718 IAA-treated and IAA washoff RAD21<sup>mAC</sup> cells. Analysis and statistics as before.  $n > 50$   
719 cells/condition from 2 biological replicates.

720

721 c) Examples of individual cells 4hr post IAA washoff showing different distributions of  
722 mClover signal within the nucleus. White lines denote nuclei based on DAPI staining.

723

724 d) Representative immunoblot analysis of chromatin-bound RAD21, MAU2 and NIPBL  
725 levels in RAD21<sup>mAC</sup> cells treated with scramble control siRNA (si Con) or siRNA to  
726 NIPBL followed by EtOH or IAA treatment. 0h and 4h represent no wash-off of IAA or  
727 a sample taken 4 hours after washoff of IAA (the 'reloading timepoint'). H3 was used  
728 as a loading control. *NB* The full blots are in Fig. S4c.

729

730 e) Western blot densitometry quantification. RAD21 fold change relative  
731 to siCon samples at the 0h timepoint in siCon 4h (grey), siNIPBL 0hr (light blue)  
732 and siNIPBL 4hr (dark blue). Whiskers and boxes indicate all and 50% of values  
733 respectively. Central line represents the median. Statistical analysis as assessed  
734 using a two-tailed t-test. Data is from 8 biological replicates.

735

736 f) Representative immunoblot analysis of chromatin-bound RAD21, SA1, SA2, MAU2  
737 and NIPBL levels in RAD21<sup>mAC</sup> cells treated according to the schematic described in  
738 Fig. S4b and including samples treated with siRNA to SA1 and SA2 together (siSA)

739 and siRNA to NIPBL + siSA. H3 was used as a loading control. Quantifications can  
740 be seen in in Fig. S4c.

741

742 g) Imaris quantification of the mClover MFI in EtOH, IAA-treated and IAA  
743 washoff RAD21<sup>mAC</sup> cells treated with siRNA to NIPBL, SA1/2 and siRNA to NIPBL  
744 + siSA. Asterisks indicate a statistically significant difference as assessed using 2-  
745 tailed T-test. Data is from 2 biological replicates with >50 cells per experiment.

746

747 h) Imaris quantification of the mClover MFI (left) and RNA (based on EU incorporation  
748 (right) in EtOH and IAA-treated RAD21<sup>mAC</sup> cells. Whiskers and boxes indicate all and  
749 50% of values, respectively. Central line represents the median. Asterisks indicate a  
750 statistically significant difference as assessed using one-way ANOVA. n>50  
751 cells/condition from 2 biological replicates.

752

753 i) Analysis of mClover MFI as in h) above, this time treated with siRNA to SA1/2 or  
754 scrambled controls. Analysis and statistics as above. n>50 cells/condition from 2  
755 biological replicates.

756

757 j) STORM analysis of localization density for RAD21-mClover in S9.6 masks in EtOH  
758 (black), IAA (grey) and IAA washoff (green) conditions. Ratio of mClover localizations  
759 inside and outside S9.6 masks is shown. Ratio of above 1 represents an enrichment  
760 within the S9.6 domain. Mean and SD are plotted, statistics based on One-Way Anova  
761 test. Data are from two biological replicates.

762

763

### 764 **Figure 5. A basic exon in SA2 influences RBP stability.**

765 a) Schematic of the SA1 and SA2 proteins showing the SA1-specific AT-hook, the  
766 conserved CES domain (blue) and the acidic C-terminus (green) which contains  
767 the basic alternatively spliced exon (red). Right-hand zoom-in indicates the spliced  
768 exons for SA1 (top) and SA2 (bottom) and the pI for each. The conservation scores for  
769 the divergent N- and C-termini and the middle portion of the proteins which contains  
770 the CES domain are shown.

771

772 b) Percent Spliced In (PSI) calculations for SA1 exon 31 (black) and SA2 exon 32  
773 (grey) based on VAST-Tools analysis of RNA-seq from multiple datasets (see  
774 Methods).

775

776 c) (top) Immunoblot analysis of SA1 levels in chromatin lysates after treatment  
777 with scrambled siRNAs (siCon), SmartPool SA1 siRNAs (siSA1 SP),  
778 control esiRNAs (esiCon) and esiRNA designed to target SA1 exon  
779 31 for 48hrs in RAD21<sup>mAC</sup> cells. (bottom) Immunoblot analysis of SA2 levels in  
780 chromatin lysates after treatment with scrambled siRNAs (siCon), SmartPool SA2  
781 siRNAs (siSA2 SP), control esiRNAs (esiCon) and siRNA designed to target SA2 exon  
782 32 for 48hrs in RAD21<sup>mAC</sup> cells. H3 serves as a loading control. The percentage of  
783 knockdown (KD) after SA signal is normalised to H3 is shown.

784

785 d) CLIP with endogenous SA2, IgG control and cells where either YFP-tagged SA2  
786 containing exon 32 (e32+) or YFP-tagged SA2 lacking exon 32 are expressed for

787 48hrs. CLIP reveals RNA associated with SA2 (blue arrows) and RBPs  
788 which specifically associate with exon-32 containing SA2 (black arrow).

789

790 e) Volcano plot displaying the statistical significance ( $-\log_{10}$  p-value) versus  
791 magnitude of change ( $\log_2$  fold change) from IP-MS of HCT116 cells expressing  
792 either YFP-SA2<sup>e32+</sup> or YFP-SA2<sup>e32Δ</sup> (n=3 biological replicate IP).  
793 Cohesin complex members are highlighted in green and the two most enriched  
794 functional categories of RNA-binding proteins in blue or Post-translational modification  
795 in red.

796

797 f) Chromatin coIP of S9.6 and IgG in RAD21<sup>mAC</sup> cells expressing the YFP-SA2  
798 isoforms and immunoblotted with antibodies representing known R-loop proteins, as  
799 well as endogenous SA2 (eSA2). Input represents 1.25% of the material used for  
800 immunoprecipitation. Bottom, S9.6 dot blot of lysates used in coIP. *NB* the shift in  
801 SA2 signal representing overexpressed protein (SA2-YFP).

802

803 g) Quantification of the immunoblot signal from f) of SA2 in the YFP-SA2 isoform band  
804 relative to input and to eSA2 signal. YFP-SA2<sup>e32+</sup> is more enriched by S9.6 IP  
805 compared to YFP-SA2<sup>e32Δ</sup>.

## 806 REFERENCES

- 807 1. Leiserson, M. D. M. *et al.* Pan-cancer network analysis identifies combinations of rare  
808 somatic mutations across pathways and protein complexes. *Nat. Genet.* **47**, 106–114  
809 (2015).
- 810 2. Horsfield, J. A. *et al.* Cohesin-dependent regulation of Runx genes. *Development* **134**,  
811 2639–2649 (2007).
- 812 3. Viny, A. D. & Levine, R. L. Cohesin mutations in myeloid malignancies made simple.  
813 *Curr. Opin. Hematol.* **25**, 61–66 (2018).
- 814 4. Hadjur, S. *et al.* Cohesins form chromosomal cis-interactions at the developmentally  
815 regulated IFNG locus. *Nature* **460**, 410–413 (2009).
- 816 5. Sofueva, S. *et al.* Cohesin-mediated interactions organize chromosomal domain  
817 architecture. *EMBO J.* **32**, 3119–3129 (2013).
- 818 6. Zuin, J. *et al.* Cohesin and CTCF differentially affect chromatin architecture and gene  
819 expression in human cells. *Proc. Natl. Acad. Sci. U.S.A.* **111**, 996–1001 (2014).
- 820 7. Kojic, A. *et al.* Distinct roles of cohesin-SA1 and cohesin-SA2 in 3D chromosome  
821 organization. *Nature Publishing Group* **25**, 496–504 (2018).
- 822 8. Rao, S. S. P. *et al.* Cohesin Loss Eliminates All Loop Domains. *Cell* **171**, 305–309.e24  
823 (2017).
- 824 9. Wutz, G. *et al.* Topologically associating domains and chromatin loops depend on  
825 cohesin and are regulated by CTCF, WAPL, and PDS5 proteins. *EMBO J.* **36**, 3573–  
826 3599 (2017).
- 827 10. Fudenberg, G., Abdennur, N., Imakaev, M., Goloborodko, A. & Mirny, L. Emerging  
828 Evidence of Chromosome Folding by Loop Extrusion. *bioRxiv* 1–24 (2018).  
829 doi:10.1101/264648
- 830 11. Balbás-Martínez, C. *et al.* Recurrent inactivation of STAG2 in bladder cancer is not  
831 associated with aneuploidy. *Nat. Genet.* **45**, 1464–1469 (2013).
- 832 12. Solomon, D. A. *et al.* Frequent truncating mutations of STAG2 in bladder cancer. *Nat.*  
833 *Genet.* **45**, 1428–1430 (2013).
- 834 13. Murayama, Y. & Uhlmann, F. Biochemical reconstitution of topological DNA binding by  
835 the cohesin ring. *Nature* **505**, 367–371 (2014).
- 836 14. Orgil, O. *et al.* A conserved domain in the scc3 subunit of cohesin mediates the  
837 interaction with both mcd1 and the cohesin loader complex. *PLoS Genet.* **11**, e1005036  
838 (2015).
- 839 15. Ciosk, R. *et al.* Cohesin's Binding to Chromosomes Depends on a Separate Complex  
840 Consisting of Scc2 and Scc4 Proteins. *Molecular Cell* **5**, 243–254 (2000).
- 841 16. Kikuchi, S., Borek, D. M., Otwinowski, Z., Tomchick, D. R. & Yu, H. Crystal structure of  
842 the cohesin loader Scc2 and insight into cohesinopathy. *Proc. Natl. Acad. Sci. U.S.A.*  
843 **113**, 12444–12449 (2016).
- 844 17. Hara, K. *et al.* Structure of cohesin subcomplex pinpoints direct shugoshin-Wapl  
845 antagonism in centromeric cohesion. *Nature Publishing Group* **21**, 864–870 (2014).
- 846 18. Li, Y. *et al.* Structural basis for Scc3-dependent cohesin recruitment to chromatin. *eLIFE*  
847 **7**, 352 (2018).
- 848 19. Shi, Z., Gao, H., Bai, X.-C. & Yu, H. Cryo-EM structure of the human cohesin-NIPBL-  
849 DNA complex. *Science* **368**, 1454–1459 (2020).
- 850 20. Higashi, T. L. *et al.* A Structure-Based Mechanism for DNA Entry into the Cohesin Ring.  
851 *Molecular Cell* **79**, 917–933.e9 (2020).
- 852 21. Xiao, T., Wallace, J. & Felsenfeld, G. Specific sites in the C terminus of CTCF interact  
853 with the SA2 subunit of the cohesin complex and are required for cohesin-dependent  
854 insulation activity. *Mol. Cell. Biol.* **31**, 2174–2183 (2011).
- 855 22. Saldaña-Meyer, R. *et al.* CTCF regulates the human p53 gene through direct interaction  
856 with its natural antisense transcript, Wrap53. *Genes Dev.* **28**, 723–734 (2014).
- 857 23. Bisht, K. K., Daniloski, Z. & Smith, S. SA1 binds directly to DNA through its unique AT-  
858 hook to promote sister chromatid cohesion at telomeres. *J. Cell. Sci.* **126**, 3493–3503  
859 (2013).
- 860 24. Lin, J. *et al.* Functional interplay between SA1 and TRF1 in telomeric DNA binding and  
861 DNA-DNA pairing. *Nucleic Acids Research* **44**, 6363–6376 (2016).

- 862 25. Countryman, P. *et al.* Cohesin SA2 is a sequence-independent DNA-binding protein that  
863 recognizes DNA replication and repair intermediates. *J. Biol. Chem.* **293**, 1054–1069  
864 (2018).
- 865 26. Murayama, Y., Samora, C. P., Kurokawa, Y., Iwasaki, H. & Uhlmann, F. Establishment  
866 of DNA-DNA Interactions by the Cohesin Ring. *Cell* 1–29 (2018).  
867 doi:10.1016/j.cell.2017.12.021
- 868 27. Zheng, G., Kanchwala, M. & Xing, C. MCM2–7-dependent cohesin loading during S  
869 phase promotes sister-chromatid cohesion. *eLIFE* 1–25 (2018).  
870 doi:10.7554/eLife.33920.001
- 871 28. García-Muse, T. & Aguilera, A. R Loops: From Physiological to Pathological Roles. *Cell*  
872 1–15 (2019). doi:10.1016/j.cell.2019.08.055
- 873 29. Crossley, M. P., Bocek, M. & Cimprich, K. A. R-Loops as Cellular Regulators and  
874 Genomic Threats. *Molecular Cell* **73**, 398–411 (2019).
- 875 30. Li, X. & Manley, J. L. Inactivation of the SR protein splicing factor ASF/SF2 results in  
876 genomic instability. *Cell* **122**, 365–378 (2005).
- 877 31. Boque-Sastre, R. *et al.* Head-to-head antisense transcription and R-loop formation  
878 promotes transcriptional activation. *Proc. Natl. Acad. Sci. U.S.A.* **112**, 5785–5790  
879 (2015).
- 880 32. Powell, W. T. *et al.* R-loop formation at Snord116 mediates topotecan inhibition of  
881 Ube3a-antisense and allele-specific chromatin decondensation. *Proc. Natl. Acad. Sci.*  
882 *U.S.A.* **110**, 13938–13943 (2013).
- 883 33. Natsume, T., Kiyomitsu, T., Saga, Y. & Kanemaki, M. T. Rapid Protein Depletion in  
884 Human Cells by Auxin-Inducible Degron Tagging with Short Homology Donors. *Cell Rep*  
885 **15**, 210–218 (2016).
- 886 34. Parelho, V. *et al.* Cohesins functionally associate with CTCF on mammalian  
887 chromosome arms. *Cell* **132**, 422–433 (2008).
- 888 35. Wendt, K. S. *et al.* Cohesin mediates transcriptional insulation by CCCTC-binding factor.  
889 *Nature* **451**, 796–801 (2008).
- 890 36. Wutz, G. *et al.* ESCO1 and CTCF enable formation of long chromatin loops by  
891 protecting cohesin-STAG1 from WAPL. *eLIFE* **9**, (2020).
- 892 37. Ricci, M. A., Manzo, C., García-Parajo, M. F., Lakadamyali, M. & Cosma, M. P.  
893 Chromatin fibers are formed by heterogeneous groups of nucleosomes in vivo. *Cell* **160**,  
894 1145–1158 (2015).
- 895 38. Roig, M. B. *et al.* Structure and function of cohesin’s Scc3/SA regulatory subunit.  
896 *FEBS Letters* **588**, 3692–3702 (2014).
- 897 39. Hons, M. T. *et al.* Topology and structure of an engineered human cohesin complex  
898 bound to Pds5B. *Nature Communications* **7**, 1–11 (2017).
- 899 40. Kim, J.-S. *et al.* Systematic proteomics of endogenous human cohesin reveals an  
900 interaction with diverse splicing factors and RNA-binding proteins required for mitotic  
901 progression. *J. Biol. Chem.* **294**, 8760–8772 (2019).
- 902 41. Panigrahi, A. K., Zhang, N., Otta, S. K., Journal, D. P. B. 2012. A cohesin–RAD21  
903 interactome. doi:10.1042/BJ20111745
- 904 42. Santos-Pereira, J. M. & Aguilera, A. R loops: new modulators of genome dynamics and  
905 function. *Nat. Rev. Genet.* **16**, 583–597 (2015).
- 906 43. Sollier, J. *et al.* Transcription-coupled nucleotide excision repair factors promote R-loop-  
907 induced genome instability. *Molecular Cell* **56**, 777–785 (2014).
- 908 44. Cristini, A., Groh, M., Kristiansen, M. S. & Gromak, N. RNA/DNA Hybrid Interactome  
909 Identifies DXH9 as a Molecular Player in Transcriptional Termination and R-Loop-  
910 Associated DNA Damage. *Cell Rep* **23**, 1891–1905 (2018).
- 911 45. Wang, I. X. *et al.* Human proteins that interact with RNA/DNA hybrids. *Genome Res.* **28**,  
912 1405–1414 (2018).
- 913 46. Skourti-Stathaki, K., Kamieniarz-Gdula, K. & Proudfoot, N. J. R-loops induce repressive  
914 chromatin marks over mammalian gene terminators. *Nature* **516**, 436–439 (2014).
- 915 47. Watrin, E. *et al.* Human Scc4 is required for cohesin binding to chromatin, sister-  
916 chromatid cohesion, and mitotic progression. *Curr. Biol.* **16**, 863–874 (2006).
- 917 48. Irimia, M. *et al.* A Highly Conserved Program of Neuronal Microexons Is Misregulated in  
918 Autistic Brains. *Cell* **159**, 1511–1523 (2014).
- 919 49. Pan, H. *et al.* Cohesin SA1 and SA2 are RNA binding proteins that localize to RNA

- 920 containing regions on DNA. *Nucleic Acids Research* **24**, 105–17 (2020).
- 921 50. Chao, W. C. H. *et al.* Structural Studies Reveal the Functional Modularity of the Scc2-  
922 Scc4 Cohesin Loader. *Cell Rep* **12**, 719–725 (2015).
- 923 51. Pezic, D. *et al.* The cohesin regulator Stag1 promotes cell plasticity through  
924 heterochromatin regulation. *bioRxiv* 1–60 (2021). doi:10.1101/2021.02.14.429938
- 925 52. Li, Y. *et al.* The structural basis for cohesin-CTCF-anchored loops. *Nature* **578**, 472–476  
926 (2020).
- 927 53. Yao, H. *et al.* Mediation of CTCF transcriptional insulation by DEAD-box RNA-binding  
928 protein p68 and steroid receptor RNA activator SRA. *Genes Dev.* **24**, 2543–2555  
929 (2010).
- 930 54. Misteli, T. Beyond the Sequence: Cellular Organization of Genome Function. *Cell* **128**,  
931 787–800 (2007).
- 932 55. Nozawa, R.-S. *et al.* SAF-A Regulates Interphase Chromosome Structure through  
933 Oligomerization with Chromatin-Associated RNAs. *Cell* **169**, 1214–1227.e18 (2017).
- 934 56. Huo, X. *et al.* The Nuclear Matrix Protein SAFB Cooperates with Major Satellite RNAs to  
935 Stabilize Heterochromatin Architecture Partially through Phase Separation. *Molecular*  
936 *Cell* **77**, 368–383.e7 (2020).
- 937 57. Ryu, J.-K. *et al.* Phase separation induced by cohesin SMC protein complexes. *bioRxiv*  
938 **58**, 142–40 (2020).
- 939 58. Skourti-Stathaki, K. *et al.* R-Loops Enhance Polycomb Repression at a Subset of  
940 Developmental Regulator Genes. *Molecular Cell* **73**, 930–945.e4 (2019).
- 941 59. Nadel, J. *et al.* RNA:DNA hybrids in the human genome have distinctive nucleotide  
942 characteristics, chromatin composition, and transcriptional relationships. *Epigenetics &*  
943 *Chromatin* **8**, 46–19 (2015).
- 944 60. Barrington, C., Georgopoulou, D., Nature, D. P.2019. Enhancer accessibility and CTCF  
945 occupancy underlie asymmetric TAD architecture and cell type specific genome  
946 topology. *nature.com* doi:10.1038/s41467-019-10725-9
- 947 61. Cox, J. & Mann, M. MaxQuant enables high peptide identification rates, individualized  
948 p.p.b.-range mass accuracies and proteome-wide protein quantification. *Nat Biotechnol*  
949 **26**, 1367–1372 (2008).
- 950 62. Choi, M. *et al.* MSstats: an R package for statistical analysis of quantitative mass  
951 spectrometry-based proteomic experiments. *Bioinformatics* **30**, 2524–2526 (2014).
- 952 63. Beltran, M. *et al.* The interaction of PRC2 with RNA or chromatin is mutually  
953 antagonistic. *Genome Res.* **26**, 896–907 (2016).
- 954

## 955 METHODS

### 956 Cell culture and IAA-mediated degradation of Rad21.

957 HCT116 cells with engineered RAD21-miniAID-mClover (RAD21<sup>mAC</sup>), or OsTIR1-  
958 only, or both (RAD21<sup>mAC</sup>-OsTIR) were obtained from Masato T. Kanemaki.  
959 Throughout this study we used RAD21<sup>mAC</sup>-OsTIR cells, and for simplicity we refer to  
960 them in the text as RAD21<sup>mAC</sup>. The cells were maintained in McCoy's 5A medium  
961 with Glutamax (Thermo Fisher Scientific) supplemented with 10% Heat-inactivated  
962 FBS (Gibco), 700 $\mu$ g/ml Geneticin, 100 $\mu$ g/ml Hygromycin B Gold  
963 and 100 $\mu$ g/ml Puromycin as described. We clonally selected the RAD21<sup>mAC</sup>-OsTIR  
964 cells by sorting green fluorescence positive single cells on a FACS Aria Fusion cell  
965 sorter (BD Bioscience). Single cells were individually seeded into one well of a 96-well  
966 plate, expanded for 10 days into 6cm culture dishes and selected with Geneticin,  
967 Hygromycin B Gold and Puromycin as indicated above in McCoy's medium for another  
968 10 days. Each clone was assessed for efficiency of Rad21 degradation using FACS  
969 analysis and western blotting (WB) using mClover, mAID and OsTIR antibodies. Two  
970 clones (H2 and H11) were taken forward and used throughout this study. To deplete  
971 RAD21, RAD21<sup>mAC</sup>-OsTIR cells were grown in adherent conditions for 3 days and  
972 treated with 500  $\mu$ M Indole-3-acetic acid (IAA, Auxin, diluted in EtOH) for 4 hours. For  
973 IAA withdrawal, IAA treated cells were washed with PBS and replaced with  
974 fresh supplemented McCoy's medium for another 4 hours. Cells were washed twice  
975 with ice-cold PBS before being harvested for later experimental procedures.

976

### 977 siRNA-mediated knockdowns.

978 For siRNA transfections, RAD21<sup>mAC</sup>-OsTIR cells were reverse transfected with  
979 scramble siRNA (siCon) or siRNAs targeting SA1, SA2, NIPBL, or AQR (Dharmacon,  
980 Horizon Discovery). A final concentration of 10 nM of siSA1, siSA2, or siNIPBL or  
981 5 nM of siAQR was reverse transfected into the cells using  
982 Lipofectamine RNAiMAX reagent (Invitrogen), as per the manufacturer's  
983 instructions. Cells were plated at a density of 1 – 1.25 x 10<sup>6</sup> cells per 10 cm dish and  
984 harvested 72hrs post-transfection, at a confluency of ~70%. The Lipofectamine-  
985 containing media was replaced with fresh media 12-16 hrs post-transfection to avoid  
986 toxicity. For Figure 5f/g, incubation time was reduced to 40 hrs. To account for the  
987 reduced growth time, cells were plated at a density of 2-3 x 10<sup>6</sup> cells per 10 cm dish.  
988 Here siCon- and siNIPBL-transfected cells were plated at a lower cell number  
989 than siAQR-transfected cells to ensure equalised confluence (~70%) at the time of  
990 collection. When IAA-treatment was combined with siRNA mediated KD, the IAA was  
991 added at the end of the normal KD condition so that total KD time was not changed  
992 compared to UT cells. For esiRNA treatment, RAD21<sup>mAC</sup>-OsTIR cells were reverse-  
993 transfected with 20  $\mu$ M FLUC control esiRNA or esiRNA custom designed to SA1  
994 exon31 or SA2 exon32 (MISSION® siRNA, Sigma Aldrich)  
995 using RNAiMAX (Invitrogen). Cells were incubated in transfection mixture for 7-8

996 hours before being replaced with fresh supplemented McCoy's medium and left for  
997 another 40h until harvest. Efficiency of KD was assessed by WB. siRNA information  
998 can be found in Table 1.

999

## 1000 **Immunofluorescence**

1001 Cells were adhered onto poly L-lysine coated glass coverslips in 6 well  
1002 culture dishes and were washed twice with ice-cold PBS before IF procedures. For  
1003 RAD21-depletion analysis, cells were fixed for 10 mins at room temperature with 3.7%  
1004 paraformaldehyde (Alfa Aesar) in PBS, washed 3 times with PBS and  
1005 then permeabilized at room temperature for 10 mins with 0.25% Triton X-100 in PBS  
1006 (Sigma Aldrich). For R-loop imaging, cells were fixed and permeabilised with ice-cold  
1007 ultra-pure mEtOH (Sigma Aldrich) for 10 mins at -20°C. After 3 washes with PBS, cells  
1008 were blocked for 45 mins at room temperature with 10% FCS-PBS. For RNASEH1  
1009 enzyme treatment, cells were incubated with blocking solution supplemented with 1x  
1010 RNASEH1 reaction buffer alone (50 mM Tris-HCl, 75 mM KCl, 3 mM MgCl<sub>2</sub>, 10 mM  
1011 DTT) or 5 units of RNASEH1 enzyme (M0297, New England Biolabs) for 30 mins at  
1012 37 °C, PBS-washed twice, before blocking. Cells were washed twice with PBS before  
1013 incubation with primary antibodies diluted in 5% FCS-PBS at 4 °C overnight. Anti-SA1,  
1014 anti-SA2 and anti-AQR were used at 1:3000 dilutions; anti-CTCF was used at 1:2500  
1015 dilution; anti-s9.6 was used at 1:1000 dilution; anti-V5 was used at 1:1000. After 4  
1016 washes with PBS, cells were incubated with secondary antibodies (donkey anti-Goat  
1017 AF555 or AF647 for SA1/2 used at 1:3000; donkey anti-Rabbit AF647 for CTCF used  
1018 at 1:2500; donkey anti-Mouse AF555 for s9.6 used at 1:2000; donkey anti-Rabbit  
1019 AF647 for AQR used at 1:3000; donkey anti-Rabbit AF488 for V5 used at 1:2000)) in  
1020 5% FCS-PBS for 1 hour at room temperature, and washed 4 times with PBS before  
1021 being mounted onto glass slides with ProLong™ Diamond Antifade Mountant with  
1022 DAPI (Thermo Fisher Scientific) to stabilise overnight in dark before  
1023 imaging. See Table 2 for details of where antibodies were purchased.

1024 Imaging was performed on Zeiss LSM confocal microscopes using 63x/1.40  
1025 NA Oil Plan-Apochromat objective lens (Carl Zeiss, Inc.). Images were captured as z-  
1026 stacks and under consistent digital gain, laser intensity and resolution for each  
1027 experiment. Numerical analysis was carried out using Imaris software (Oxford  
1028 Instruments, version 9.5.1) and representative images are shown as maximum z-  
1029 projected views generated using Fiji Image J. In brief, z-stack images were imported  
1030 into Imaris, cells were identified using DAPI and only those located 1 μm away from  
1031 image boundary and sized between 120-800 μm<sup>3</sup> were selected. A seed-split function  
1032 of 7.5um was used to separate closely situated cells. Fluorescence intensities of  
1033 individual DAPI-selections in each channel were determined by Imaris and exported  
1034 into Excel for further analysis. Distribution plots were generated from >50 cells of each  
1035 replicate with 3 biological replicates per experiment. Student's *t*-test was performed  
1036 between control and experimental conditions and statistical significance was  
1037 determined by detecting the difference between means (unequal variance, two-tailed).



1038 Significance is denoted as  $p > 0.05$  = not significant (ns),  $p \leq 0.05$  = \*,  $p \leq 0.005$  = \*\*,  
1039  $p \leq 0.0005$  = \*\*\* and  $p \leq 0.0001$  = \*\*\*\*.

1040

#### 1041 **Chromatin Fractionation and colmunoprecipitation.**

1042 Cells were washed twice with ice-cold PBS (Sigma Aldrich) and lysed in Buffer A (10  
1043 mM HEPES, 10mM KCl, 1.5 mM MgCl<sub>2</sub>, 0.34 M Sucrose, 10% Glycerol, 1mM DTT,  
1044 1mM PMSF/Pefabloc, protease inhibitor), supplemented with 0.1% T-X100, for 10 min  
1045 on ice. Lysed cells were collected by scraping. Nuclei and cytoplasmic  
1046 material was separated by centrifugation for 4 min at 1300 g at 4oC. The supernatant  
1047 was collected as the cytoplasmic fraction and cleared of any insoluble material with  
1048 further centrifugation for 15 min at 20,000 g at 4oC. The nuclear pellet was washed  
1049 once with buffer A before lysis in buffer B (3mM EDTA, 0.2mM EGTA, 1mM DTT, 1mM  
1050 PMSF/Pefabloc, protease inhibitor) with rotation for 30 min at 4oC. Insoluble nuclear  
1051 material was spun down for 4 min at 1700 g at 4oC and the supernatant taken as  
1052 nuclear soluble fraction. The insoluble material was wash once with buffer B and then  
1053 resuspended in high-salt chromatin solubilization buffer (50mM Tris-HCl pH 7.5, 1.5  
1054 mM MgCl<sub>2</sub>, 500mM KCl, 1mM EDTA, 20% Glycerol, 0.1% NP-40, 1mM  
1055 PMSF/Pefabloc, protease inhibitor). The lysate was vortexed for 2 min to aid  
1056 solubilization. Nucleic acids were digested with 85U benzonase (Sigma-Aldrich) per  
1057 100 x 10<sup>6</sup> cells, with incubation for 10 min at 37oC and 20 min at 4oC. Chromatin was  
1058 further solubilized with ultra-sonication for 3 x 10 sec at an amplitude of 30. The lysate  
1059 was diluted to 200 mM KCl and insoluble material was removed by centrifugation at  
1060 15,000 RPM for 30 min at 4oC.

1061 For coIP, antibodies were bound to Dynabead Protein A/G beads  
1062 (ThermoFisher Scientific) for 10 min at room temperature and ~ 5 hr at 4oC. For mock  
1063 IgG IPs, beads were incubated with serum from the same host type as the antibody of  
1064 interest. 1mg of chromatin extract was incubated with the antibody-bead conjugate per  
1065 IP for approximately 16 hr at 4oC. IPs were washed x5 with IP buffer (200mM  
1066 chromatin solubilization buffer) and eluted by boiling in either 2x Laemmli sample  
1067 buffer (BioRad) or 4x NuPAGE LDS sample buffer (ThermoFisher Scientific). Proteins  
1068  $\leq 250$  kDa were separated by SDS-PAGE electrophoresis using 4–20% Mini-  
1069 PROTEAN® TGX™ Precast Protein Gels (BioRad) and transferred to Immobilon-P  
1070 PVDF Membrane (Merck Millipore) for detection. Proteins  $\geq 250$  kDa were separated  
1071 by SDS-PAGE electrophoresis using Invitrogen NuPAGE 3-8% Tris-Acetate precast  
1072 protein gels. Transfer was extended to overnight with low voltage (20V) to aid in  
1073 transfer of the high-molecular weight proteins. Membranes were incubated in primary  
1074 antibody solution overnight at 4oC and images were detected using chemiluminescent  
1075 fluorescence. Densitometry was carried out using ImageStudio Lite software with  
1076 statistical significance calculated by unpaired t test, unless otherwise specified. Fold  
1077 enrichment quantifications were performed by first normalising the raw densitometry  
1078 value to its corresponding Histone H3 quantification and the comparing between the  
1079 samples indicated. See Table 2 for details of antibodies.

1080

### 1081 **S9.6 IP and Dot Blot.**

1082 Cells were fractionated and processed for S9.6 IP as described above, with the following  
1083 modifications. To avoid digestion of RNA:DNA hybrids, samples were not treated  
1084 with benzonase during chromatin solubilization and sonication was carried out for 10  
1085 min (Diagenode Biorupter) as in <sup>44</sup>. Where indicated, chromatin samples were treated  
1086 with Ribonuclease H enzyme (NEB) overnight at 37°C to digest RNA:DNA hybrids in  
1087 the extract. To avoid detection of single-stranded RNA by the S9.6 antibody, all S9.6  
1088 IP samples were pre-treated with Purelink RNase A (Thermo Fisher Scientific) at  
1089 0.25ug/1mg chromatin extract for 1 hr 30 min at 4°C. The reaction was stopped with  
1090 addition of 143U Invitrogen SUPERase•In RNase Inhibitor (Thermo Fisher  
1091 Scientific). RNA:DNA hybrid levels were assessed in chromatin samples by dot blot.  
1092 Specifically, the chromatin lysate was directly wicked  
1093 onto Amersham Protran nitrocellulose membrane (Merck) by pipetting small volumes  
1094 above the membrane. Membranes were blocked in 5% (w/v) non-fat dry milk in PBS-  
1095 0.1% Tween and incubated with S9.6 antibody overnight as for standard western blot.  
1096 As above, detection was carried out using chemiluminescent fluorescence. RNase A-  
1097 mediated digestion of RNA:DNA hybrids was performed using a non-ssRNA-specific  
1098 enzyme (Thermo Scientific) at 1.5ug/25ug chromatin extract at 37°C.

1099

### 1100 **ChIP-sequencing, library preparation and analysis.**

1101 ChIP lysates were prepared from RAD21<sup>mAC</sup> cells treated with EtOH or IAA for 6hrs in  
1102 two biological replicates. Formaldehyde (1%) was added to the culture medium for  
1103 10min at room temperature. Fixation was blocked with 0.125M glycine and cells were  
1104 washed in cold PBS. Nuclear extracts were prepared by douncing (20 strokes, medium  
1105 pestle) in swelling buffer (25 mM HEPES pH8, 1.5 mM MgCl<sub>2</sub>, 10mM KCL, 0.1%  
1106 NP40, 1 mM DTT and protease inhibitors) and centrifuged for 5min at 2000rpm at  
1107 4C. Nuclear pellets were resuspended in Sucrose buffer I (15mM Hepes pH 8, 340  
1108 mM Sucrose, 60mM KCL, 2mM EDTA, 0.5 mM EGTA, 0.5% BSA, 0.5 mM DTT and  
1109 protease inhibitors) and dounced again with 20 strokes. The lysate was carefully laid  
1110 on top of an equal volume of Sucrose buffer II (15mM Hepes pH 8, 30% Sucrose,  
1111 60mM KCL, 2mM EDTA, 0.5 mM EGTA, 0.5 mM DTT and protease inhibitors) and  
1112 centrifuged for 15min at 4000rpm at 4C. Nuclei were washed twice to remove  
1113 cytoplasmic proteins, centrifuged and the pellet was resuspended in  
1114 Sonication/RIPA buffer (50mM Tris, pH 8.0, 140 mM NaCl, 1 mM EDTA, 1% Triton X-  
1115 100, 0.1% Na-deoxycholate, 0.1% SDS and protease inhibitors) at a concentration of  
1116 5 x10<sup>6</sup> nuclei in 130ul buffer. This was transferred to a sonication tube (AFA Fiber  
1117 Pre-Slit Snap-Cap 6x16mm) and sonicated in a Covaris S2 (settings; 4 cycles of 60  
1118 seconds, 10% duty cycle, intensity: 5, 200 cycles per burst). Soluble chromatin was  
1119 in the range of 200 - 400 bp. Triton X100 was added (final concentration 1%) to the  
1120 sonicated chromatin and moved to a low-retention tube (Eppendorf) before

1121 centrifugation at 14,000 rpm for 15min at 4C and pellets were discarded. 1/100<sup>th</sup> of the  
1122 chromatin lysate was retained as the Input sample.

1123 For Immunoprecipitation, 200ug chromatin aliquots/IP were precleared with a  
1124 slurry of Protein A/G (50:50) (Dynabeads) and incubated for 4hr at 4C. Meanwhile,  
1125 washed Protein A/G beads (40ul per IP) were mixed with primary antibodies and  
1126 incubated for 4hrs at 4C. The following amounts of antibodies were used: anti-  
1127 CTCF, 5ug/ChIP; anti-SA1, 15ug/ChIP; anti-SA2, 10ug of the mixed antibody  
1128 pack/ChIP; anti-Smc3, 5ug/ChIP and anti-IgG, 10ug/ChIP. See Table 2 for information  
1129 about the antibodies. Washed, pre-bound Protein A/G beads+antibody were mixed  
1130 with pre-cleared chromatin lysates and incubated overnight with rotation at 4C. The  
1131 next day, the supernatant was removed and the beads were washed 9 times with  
1132 increasing salt concentrations. Protein-DNA crosslinks were reversed in ChIP elution  
1133 buffer (1% SDS, 5 mM EDTA, 10 mM Tris HCl pH 8) + 2.5 ul of Proteinase K and  
1134 incubated for 1 hour at 55°C and overnight at 65°C. Samples were phenol-chloroform  
1135 extracted, resuspended in TE buffer and assessed by qPCR as a quality  
1136 control. Libraries were prepared from 5-10ng of purified DNA, depending on  
1137 availability of material, using NEBNext Ultra II DNA Library Prep Kit for Illumina kit and  
1138 using NEBNext Multiplex Oligos for Illumina (Index Primers Set 2) according to  
1139 manufacturer's instructions using 6-8 cycles of PCR. ChIP-seq libraries from one  
1140 biological set (all ChIP libraries for both EtOH and  
1141 IAA) were multiplexed and sequenced on the Illumina HiSeq2500 platform, 80bp  
1142 single-end reads. Each biological set was sequenced on a separate run.

1143 Quality control of reads was performed using FASTQC. Reads were aligned to  
1144 the hg19 reference genome using Bowtie with 3 mismatches. PCR duplicates were  
1145 detected and removed using SAMTOOLS. Bam files were imported into MISHA (v  
1146 3.5.6) and peaks were identified using a 0.995 percentile. Peaks that overlapped in  
1147 both replicates were retained. Only replicate 1 of the SA1 library was used. Correlation  
1148 plots of peaks across the genome from different ChIP libraries were compared with  
1149 log-transformed percentiles plotted as a smoothed scatter plot. Comparison of peaks  
1150 at regions of interest were carried out using deepTools (Version 3.1.0-2). For input  
1151 into deepTools, peak data was converted to bigwig format, with a bin size of 500, using  
1152 the UCSC bedGraphToBigWig package. The signal matrix was calculated for a window  
1153 2,000 bp up- and down-stream of the region of interest, missing data was treated as  
1154 zero, and all other parameters were as default. Heatmaps were generated  
1155 within deepTools, with parameters as default. Read density profile plots were plotted  
1156 in ggplot using deepTools profilePlot -perGroup data and smoothed using  
1157 geom\_smooth default 'gam' settings.

1158

### 1159 **DRIP-sequencing.**

1160 DRIP lysates were prepared from chromatin. Chromatin was fractionated as described  
1161 for ChIP samples above, with the following changes. Samples were not fixed and were  
1162 collected from the plate by scraping in ice-cold PBS. Sonication was performed to

1163 solubilise the chromatin using a picorupter with 10 cycles of 30 sec on, 30 sec off.  
1164 Following sonication, 60U of RNase I (Ambion) was incubated with each sample for  
1165 1.5hrs at 37°C to reduce off-target RNA binding by S9.6. Protein was digested with  
1166 184ug of proteinase K incubated with each sample for 2.5hrs at 45°C and 3.5hrs at  
1167 55°C. Samples were spun briefly and the supernatant taken. Nucleic acid material was  
1168 isolated from the sample by phenol-chloroform extraction and isopropanol  
1169 precipitation. Purified nucleic acid material was IP'd as in <sup>58</sup>, including resuspension  
1170 nuclear lysis buffer and fragmentation by sonication using a picorupter for 4 cycles of  
1171 30sec on, 30 sec off. Following elution, reverse crosslinking, and proteinase K  
1172 treatment the immunoprecipitated nucleic acid was purified by phenol-chloroform  
1173 extraction and isopropanol precipitation. Second strand synthesis was carried out  
1174 according to <sup>59</sup> with minor changes. Namely, the reaction was set up in a PCR tube  
1175 as: ~28ul eluted DRIP sample, ~27ul nuclease-free water (depending on DRIP  
1176 sample, for a total of 75ul), 15ul 5X ss buffer, 2ul 10mM dNTP, 0.5ul DNA ligase (E.  
1177 coli, NEB cat. M0205S), 2ul DNA polymerase I (E.coli, NEB cat. M0209S), 0.5ul  
1178 RNase H (2.5 units). This was incubated for 2hrs at 16°C. dsDNA was purified using  
1179 a 1.8X ratio of SPRI beads and eluted in ultrapure water. Libraries were prepared  
1180 using NEB Ultra II DNA library prep kit according to manufacturer's instructions and  
1181 sequenced on the Illumina NovaSeq platform, 100bp paired-end reads (30M per  
1182 sample). Reads were aligned and processed as for the ChIP-seq samples above with  
1183 two changes; i) reads were quality trimmed using trimfq -b 14 -e 16, and ii) a maximum  
1184 insert size of 1000 was set for bowtie. DeepTools analysis was carried out as for  
1185 ChIP-seq samples and with binSize set to 2bp.

1186

### 1187 **ChromHMM.**

1188 ChIP-seq data for YY1, CBX3, SIN3A, POLR2A, POLR2AphosphoS5, H3K27ac,  
1189 H3K4me3, H3K4me1, H3K27me3, EZH2, and H3K9me3 from HCT116 cells were  
1190 obtained from ENCODE and processed as above. ChIP-seq, DRIP-seq, and ENCODE  
1191 ChIP-seq. BAM files were binarized in ChromHMM using a bin size of 200 bp and a  
1192 shift of 150 bp. Where input files were available on ENCODE they were used in  
1193 ChromHMM to determine the binarization threshold, otherwise the ChromHMM default  
1194 of a uniform background was assumed. The chromatin state model was generated for  
1195 15 states and compared to the hg19 genome assembly. All other parameters were as  
1196 default.

1197

### 1198 **Hi-C data and contact hotspots analysis.**

1199 Generating hotspots - Previously published Hi-C datasets derived from  
1200 RAD21<sup>mAC</sup> cells treated with EtOH or IAA <sup>8</sup> were analyzed as previously described  
1201 <sup>60</sup>. Custom R scripts were written to identify Hi-C hotspots, i.e. regions of Hi-C maps  
1202 with high contact frequency. To begin, for each chromosome, all contacts were  
1203 extracted and subsetted for only high scoring (>=60) contacts between a band of 10e3  
1204 – 70e6. Using KNN, for each high scoring contact, the 250 nearest neighbour contacts

1205 were identified and subset for only the high-scoring neighbours. This created a list of  
1206 high scoring neighbours for each high scoring contact, where the first neighbour is the  
1207 contact itself with a distance of 0. This allowed the neighbour information to be  
1208 converted into edge information, thereby allowing high score fend contacts to be  
1209 grouped into cluster hotspots using the R package 'igraph'. Hotspots that contained  
1210 less than the minimum number of high scoring fends (<100) were removed. The output  
1211 list of hotspots were represented as 2D intervals which contained high scoring  
1212 contacts. In total, 5539 hotspots were identified in EtOH and 759 in IAA Hi-C data.

1213 Creating aggregate plots - To calculate and visualise the contact enrichment at  
1214 hotspots in the EtOH and IAA Hi-C, we used the R package 'shaman'. Firstly, we used  
1215 the function 'shaman\_generate\_feature\_grid' to calculate the enrichment profile at  
1216 EtOH and IAA hotspots. Using the weighted centre for each hotspot, represented as  
1217 a 2D interval we used the function to build grids for the EtOH and IAA hotspots in the  
1218 HiC data at 3 specific bands, 100k – 1MB, 1MB – 5MB, 5MB – 10MB. A range of  
1219 250kb was visualised around the weighted centre. The grid was built by taking all  
1220 combinations interval1 and interval2 of the EtOH and IAA hotspot centres, with each  
1221 combination termed a 'window'. Hotspots were not filtered for size or shape. A score  
1222 threshold of 60 was used to focus on enriched pairs, those windows that did not  
1223 contain at least one point with a score of 60 were discarded. Each window was then  
1224 split into 1000nt bins and the windows were summed together to generate a grid  
1225 containing the observed and expected contacts. We visualised the grid using  
1226 'shaman\_plot\_feature\_grid' using 'enrichment' mode and a plot\_resolution value of  
1227 6000, due to the large range being visualised.

1228

### 1229 **STORM – Immunolabelling and imaging.**

1230 Two clones of RAD21<sup>mAC</sup>-OsTIR cells were seeded at a density of 30,000 cells per  
1231 well per 400ul) onto poly-L-lysine coated 8-well chamber slides (Lab-Tek™ 155411)  
1232 overnight. Each clone was treated with EtOH, IAA or IAA washoff and then fixed with  
1233 PFA 4% (Alfa Aesar) for 10 min at room temperature and rinsed with PBS three times  
1234 for 5 min each. The cells were shipped to the Cosma Lab after fixation for STORM  
1235 processing and imaging. Cells were permeabilized with 0.3% Triton X-100 in PBS  
1236 and blocked in blocking buffer (10% BSA – 0.01 % Triton X-100 in PBS) for one hour  
1237 at room temperature. Cells were incubated with primary antibodies (see Table 2) in  
1238 blocking buffer at 1:50 dilution. For combined S9.6/STAG1 and S9.6/RAD21-GFP  
1239 imaging, cells were incubated with primary antibodies in blocking buffer (dilutions  
1240 1:100 for S9.6 and STAG1, 1:250 for GFP). Cells were washed three times for 5 min  
1241 each with wash buffer (2% BSA – 0.01 % Triton X-100 in PBS) and incubated in  
1242 secondary antibody. For STORM imaging, home-made (Bates et al., 2007) dye pair  
1243 labeled secondary antibodies were added at a 1:50 dilution in blocking buffer and were  
1244 incubated for 45 min at room temperature or single fluorophore labeled commercial  
1245 antibodies were added at a 1:250 dilution in blocking buffer and were incubated for 45

1246 min at room temperature (see Table 2). Cells were washed three times for 5 min each  
1247 with wash buffer.

1248         STORM imaging was performed on an N-STORM 4.0 microscope (Nikon)  
1249 equipped with a CFI HP Apochromat TIRF 100x 1.49 oil objective and an iXon Ultra  
1250 897 camera (Andor) and using Highly Inclined and Laminated Optical sheet  
1251 illumination (HILO). Dual color STORM imaging was performed with a double activator  
1252 and single reporter strategy by combining AF405\_AF647 anti-Goat secondary with  
1253 Cy3\_AF647 anti-Rabbit secondary antibodies. Sequential imaging acquisition was  
1254 performed (1 frame of 405 nm activation followed by 3 frames of 647 nm reporter and  
1255 1 frame of 560 nm activation followed by 3 frames of 647 nm reporter) with  
1256 10 ms exposure time for 120000 frames. 647 nm laser was used at constant  $\sim 2$   
1257  $\text{kW}/\text{cm}^2$  power density and 405 nm and 560 nm laser powers were gradually increased  
1258 over the imaging. For S9.6 experiments, before STORM imaging, conventional images  
1259 were taken for s9.6 signal (AF568 labeled) with a TRITC filter, for endogenous  
1260 mClover signal with a FITC filter and for STAG1 or GFP (AF647 labeled) with a  
1261 Quadband filter. STORM imaging for STAG1 or GFP was performed with continuous  
1262 imaging acquisition (i.e. simultaneous stimulation with 405 and 647 nm lasers) with 10  
1263 ms exposure time for 60000 frames. 647 nm laser was used at constant  $\sim 2$   $\text{kW}/\text{cm}^2$   
1264 power density and 405 nm was gradually increased over the imaging. Imaging buffer  
1265 composition for STORM imaging was 100 mM Cysteamine MEA (Sigma-Aldrich,  
1266 #30070) - 5% Glucose (Sigma-Aldrich, #G8270) – 1% Glox Solution (0.5 mg/ml  
1267 glucose oxidase, 40 mg/ml catalase (Sigma-Aldrich, #G2133 and #C100)) in PBS.

1268

### 1269 **STORM imaging analysis and quantifications.**

1270 STORM images were analyzed and rendered with Insight3 software (kind gift of Bo  
1271 Huang, UCSF, Huang et al., 2008) as previously described (Bates et al., 2007; Rust  
1272 et al., 2006). Localizations were identified based on a threshold and fit to a simple  
1273 Gaussian to determine the x and y positions. Cluster analysis of CTCF, SA1 and SA2  
1274 STORM signal was performed as previously described (Ricci et al., 2015) to obtain  
1275 cluster size and positions and to measure Nearest  
1276 Neighbour distributions (NND) between clusters of the same protein in individual  
1277 nuclei. NND between clusters' centroids of two different proteins (i.e. CTCF-SA1 and  
1278 CTCF-SA2) was calculated by knnsearch.m Matlab function and the NND histogram  
1279 of experimental data was obtained by considering all the NNDs of individual nuclei  
1280 (histogram bin, from 0 to 500 nm, 5 nm steps). Simulated NNDs recapitulating random  
1281 spatial distribution of cluster centroids were first obtained for each nucleus separately  
1282 and then merged to calculate the simulated NND histogram (histogram bin, from 0 to  
1283 500 nm, 5 nm steps). The difference plot reports the difference between experimental  
1284 NND and simulated NND. Quantification and analysis of STORM  
1285 images was performed in Matlab and statistical analysis was performed  
1286 in Graphpad Prism (v7.0e). The type of statistical test is specified in each case.  
1287 Statistical significance is represented as indicated above.

1288 Analysis for S9.6 experiments was performed in the following way. After  
1289 generating localization lists for each STORM image, nuclear masks and S9.6 were  
1290 generated to segment the obtained localizations belonging to nuclear areas inside or  
1291 outside s9.6 enriched regions. Masks generation, quantification of masks' areas and  
1292 segmentation of STORM localizations were performed in Fiji/ImageJ. Nuclear masks  
1293 were manually designed based on STAG1/GFP signal. S9.6 masks were generated  
1294 by applying an automatic threshold on s9.6 images based on nuclear intensity signal.  
1295 Masks were visually inspected individually and adjusted manually in cases where dim  
1296 signal or noise from cytosolic signal compromised the identification of the mask. The  
1297 area of all masks was calculated. Masks were applied to the STORM localization lists  
1298 to generate segmented lists with the localizations belonging to the entire nucleus and  
1299 to the s9.6 enriched areas. Finally, the density of localizations (number of  
1300 localizations/area of the mask) for the areas inside and outside s9.6 masks was  
1301 calculated and the ratio between both values was plotted.

1302 Graphpad Prism software used for statistical analysis can be found  
1303 at: <https://www.graphpad.com/scientific-software/prism/> MatLab software used for  
1304 imaging data analysis can be found  
1305 at: <https://www.mathworks.com/products/matlab.html>

1306

### 1307 **Mass spectrometry sample preparation and running.**

1308 SA1 immunoprecipitation samples were analysed by liquid chromatography–tandem  
1309 mass spectrometry (LC-MS/MS). Three biological replicate experiments were carried  
1310 out for MS and each included four samples, untreated (UT), treated with IAA for  
1311 4hrs, siCon, or siSA1, generated as described above. Cells were fractionated to purify  
1312 chromatin-bound proteins as above and immunoprecipitated with IgG- or SA1-bead  
1313 conjugates. To maximise IP material for the MS, the antibody amount was increased  
1314 to 15ug and the chromatin amount was increased to 2mg.

1315 The IP eluates were loaded into a pre-cast SDS-PAGE gel (4–20% Mini-  
1316 PROTEAN® TGX™ Precast Protein Gel, 10-well, 50  $\mu$ L) and proteins were run  
1317 approximately 1 cm to prevent protein separation. Protein bands were excised and  
1318 diced, and proteins were reduced with 5 mM TCEP in 50 mM triethylammonium  
1319 bicarbonate (TEAB) at 37°C for 20 min, alkylated with 10 mM 2-chloroacetamide in 50  
1320 mM TEAB at ambient temperature for 20 min in the dark. Proteins were then digested  
1321 with 150ng trypsin, at 37°C for 4 h followed by a second trypsin addition for 4 h, then  
1322 overnight at room temperature. After digestion, peptides were extracted with  
1323 acetonitrile and 50 mM TEAB washes. Samples were evaporated to dryness at 30°C  
1324 and resolubilised in 0.1% formic acid.

1325 nLC-MS/MS was performed on a Q Exactive Orbitrap Plus interfaced to a  
1326 NANOSPRAY FLEX ion source and coupled to an Easy-nLC 1200 (Thermo Scientific).  
1327 25% (first, second and fourth biological replicate) or 50% (third biological replicate) of  
1328 each sample was loaded as 5 or 10  $\mu$ L injections. Peptides were separated on a 27cm  
1329 fused silica emitter, 75  $\mu$ m diameter, packed in-house with Repronil-Pur 200 C18-AQ,

1330 2.4  $\mu\text{m}$  resin (Dr. Maisch) using a linear gradient from 5% to 30% acetonitrile/ 0.1%  
1331 formic acid over 60 min, at a flow rate of 250 nL/min. Peptides were ionised by  
1332 electrospray ionisation using 1.8 kV applied immediately prior to the analytical column  
1333 via a microtee built into the nanospray source with the ion transfer tube heated to  
1334 320°C and the S-lens set to 60%. Precursor ions were measured in a data-dependent  
1335 mode in the orbitrap analyser at a resolution of 70,000 and a target value of 3e6 ions.  
1336 The ten most intense ions from each MS1 scan were isolated, fragmented in the HCD  
1337 cell, and measured in the orbitrap at a resolution of 17,500.

1338

### 1339 **Mass spectrometry analysis**

1340 Raw data was analysed with MaxQuant<sup>61</sup> version 1.5.5.1 where they were searched  
1341 against the human UniProtKB database using default settings  
1342 (<http://www.uniprot.org/>). Carbamidomethylation of cysteines was set as fixed  
1343 modification, and oxidation of methionines and acetylation at protein N-termini were  
1344 set as variable modifications. Enzyme specificity was set to trypsin with maximally 2  
1345 missed cleavages allowed. To ensure high confidence identifications, PSMs, peptides,  
1346 and proteins were filtered at a less than 1% false discovery rate (FDR). Label-free  
1347 quantification in MaxQuant was used with LFQ minimum ratio count set to 2 with  
1348 'FastLFQ' (LFQ minimum number of neighbours = 3, and LFQ average number of  
1349 neighbours = 6) and 'Skip normalisation' selected. In Advanced identifications,  
1350 'Second peptides' was selected and the 'match between runs' feature was not  
1351 selected. Statistical protein quantification analysis was done in MSstats<sup>62</sup>(version  
1352 3.14.0) run through RStudio. Contaminants and reverse sequences were removed  
1353 and data was log2 transformed. To find differential abundant proteins across  
1354 conditions, paired significance analysis consisting of fitting a statistical model and  
1355 performing model-based comparison of conditions. The group comparison function  
1356 was employed to test for differential abundance between conditions. Unadjusted p-  
1357 values were used to rank the testing results and to define regulated proteins between  
1358 groups.

1359 Proteins with peptides discovered in the IgG samples were disregarded from  
1360 downstream analyses. Significantly depleted/enriched proteins were considered with  
1361 an absolute log2foldchange > 0.58 (1.5-fold change) and a p-value < 0.1. SA1  
1362 interactome analysis was performed in STRING. The network was generated as a full  
1363 STRING network with a minimum interaction score of 0.7 required. Over-enrichment  
1364 of GO biological process and molecular function terms was calculated with the human  
1365 genome as background. Network analysis of the SA1 interactome in IAA-treated  
1366 samples was generated from the significantly depleted/enriched proteins, with a  
1367 minimum interaction score of 0.4 required. Two conditions for functional enrichments  
1368 were considered; i) enrichment was calculated with the human genome as background  
1369 to determine the full SA1 interactome in the absence of cohesin, and ii) enrichment  
1370 was calculated with the untreated SA1 interactome as background, to determine the  
1371 statistical effect of cohesin loss of the SA1 interactome itself. The network developed



1372 in i) was manually rearranged in Cytoscape for visual clarity, enriched categories were  
1373 visualized using the STRING pie chart function and half of the proteins within each  
1374 category were subset from the network based on pvalue change between UTR and  
1375 IAA samples.

1376 Over-enrichment of the s9.6 interactome was calculated separately using the  
1377 hypergeometric distribution for comparison with <sup>44,45</sup>. Significance was calculated  
1378 using the dhyper function in R and multiple testing was corrected for using the p.adjust  
1379 Benjamini & Hochberg method. To compare with a minimal background protein list,  
1380 <http://www.humanproteomemap.org> was analysed on the Expression Atlas database  
1381 to determine a list of proteins expressed in one or more of three tissue types  
1382 corresponding to the cell types used across the different studies.

1383

### 1384 **SLiMSearch analysis**

1385 The SLiMSearch tool <http://slim.icr.ac.uk/slimsearch/>, with default parameters was  
1386 used to search the human proteome for additional proteins that contained the FGF-  
1387 like motif determined in <sup>18</sup> to predict binding to SA proteins. The motif was input as  
1388 [PFCAVIYL][FY][GDEN]F.{0,1}[DANE].{0,1}[DE]. Along with CTCF, four proteins  
1389 found to contain the FGF-like motif, CHD6, MCM3, HNRNPUL2 and ESYT2 were  
1390 validated for interaction with SA.

1391

### 1392 **CLIP**

1393 Crosslinking immunoprecipitation (CLIP) was performed as previously described<sup>63</sup>.  
1394 Briefly, mESC or HCT116 cells were irradiated with 0.2 J/cm<sup>2</sup> of 254 nm UV light in a  
1395 Strat linker 2400 (Stratagene). Cells were lysed in 1 ml of lysis buffer with Complete  
1396 protease inhibitor (Roche). Lysates were passed through a 27 G needle, 1.6 U DNase  
1397 Turbo (ThermoFisher) per 10<sup>6</sup> cells and 0.8 (low) or 8 U (high) U RNase I (Ambion) per  
1398 10<sup>6</sup> cells added, and incubated in a thermomixer at 37°C and 1100 rpm for 3 minutes.  
1399 Lysates were then cleared by centrifugation and using Proteus clarification spin  
1400 column, according to the manufacturer's instructions. Endogenous SA1 and SA2 were  
1401 immunoprecipitated with 10 µg SA1 and SA2 antibodies or non-specific IgG control  
1402 (Sigma) conjugated to protein G dynabeads (Dyna) for 4 hrs at 4°C. Tagged SA2  
1403 proteins were immunoprecipitated from HCT116 cells 40 hours after transfection with  
1404 30 µl GFP-Trap beads. IPs were washed three times with high salt buffer (containing  
1405 1M NaCl and 1M urea) and once with PNK buffer and RNA labelled with 8 µl  
1406 radioactive <sup>32</sup>P-gamma-ATP (Hartmann Analytic) for 5 mins at 37°C. RNPs were  
1407 eluted in LDS loading buffer (Invitrogen) and resolved on a 4-12% gradient NuPAGE  
1408 Bis-Tris gel (Invitrogen) and transferred onto 0.2 µm diameter pore nitrocellulose  
1409 membrane. After blocking with PBST+milk, membranes were washed and exposed  
1410 overnight to phosphorimager screen (Fuji) and RNA-<sup>32</sup>P visualized using a Typhoon  
1411 phosphorimager (GE) and ImageQuant TL (GE). Membranes were then  
1412 immunoblotted for SA1, SA2, and RAD21 and visualized using an ImageQuantLAS  
1413 4000 imager (GE). See Table 2 for details on antibodies.

1414

1415 **GFP-TRAP + Cloning of STAG2 isoforms and YFP constructs.**

1416 SA2 cDNAs were cloned directly from HCT116 cells by PCR using KAPA  
1417 HiFi HotStart PCR kit (Roche) (Fwd: ATGATAGCAGCTCCAGAAAACCAACTG; Rev:  
1418 TTA AACATTGACACTCCAAGAACTGATTCATCC). Two major isoforms were  
1419 detected, SA2<sup>Δex32</sup> where exon32 has been spliced out and SA2<sup>+ex32</sup> where exon  
1420 32 has been spliced in. Both SA2 cDNAs were cloned into pENTR/D vector  
1421 (Invitrogen) and then into an N-terminal YFP-tagged Gateway cloning vector (a kind  
1422 gift from Endre Kiss-Toth, University of Sheffield). Sequences were confirmed by  
1423 restriction enzyme digestion and Sanger sequencing. Recombinant YFP-SA2<sup>Δex32</sup> or  
1424 YFP-SA2<sup>+ex32</sup> were transfected into adherent HCT116 cells for 40 hours before being  
1425 harvested. Cells were lysed and fractionated as indicated for CLIP. One third of  
1426 the whole cell lysate was pre-cleared with a 50:50 mixture of protein A/G magnetic  
1427 beads and GFP-Trap (Chromotek, gtd-20) was pre-blocked with 1mg/mL ultra-pure  
1428 BSA (AM2616, Invitrogen) for 2h at 4°C. After blocking, GFP-Trap was washed twice  
1429 with CLIP lysis buffer and added to pre-cleared lysates to immunoprecipitate proteins  
1430 for 1h at 4°C. Samples were washed in high salt buffer (50mM Tris-HCL pH 7.4, 1M  
1431 NaCl, 1mM EDTA, 1% NP-40, 0.1% SDS, 0.5% sodium deoxycholate, 1M Urea) and  
1432 low salt PNK buffer (20mM Tris-HCL pH 7.4, 10mM MgCl<sub>2</sub>, 0.2% Tween-20), and  
1433 eluted in 2x Laemmli buffer (Bio-Rad). Proteins were separated by SDS-PAGE on a  
1434 4-20% gradient mini-PROTEAN® Precast Gel (Bio-Rad) and transferred onto PVDF  
1435 membrane for visualization.

1436

1437 **VAST-TOOLS**

1438 VAST-TOOLS was used to generate Percent Spliced In (PSI) scores, a statistic which  
1439 represents how often a particular exon is spliced into a transcript using the ratio  
1440 between reads which include and exclude said exon. Paired-end RNA-seq datasets  
1441 were submitted to VAST-TOOLS (v2.1.3) using the Mmu genome (Tapial J et al, Gen  
1442 Res 2017). Briefly, reads are split into 50nt words with a 25nt sliding window. The 50nt  
1443 words are aligned to a reference genome using Bowtie to obtain unmapped reads.  
1444 These unmapped reads are then aligned to a set of predefined exon-exon junction  
1445 (EJJ) libraries allowing for the quantification of alternative exon events. The output  
1446 was further interrogated using a script which searches all hypothetical EEJ  
1447 combinations between potential donors and acceptors within Stag1. PSI scores could  
1448 be obtained providing there was at least a single read within the RNAseq data that  
1449 supported the event, although we only considered events supported by a minimum  
1450 of 50 reads. Calculated PSI values for each alternatively spliced exon as well as  
1451 the average PSI reported in the text are shown below. See Supp Fig 5 for names of  
1452 published datasets used in this analysis.

1453 **Table 1. siRNAs used in this study.**

| siRNA name          | Company   | Target     | Catalogue no.    | custom siRNA sequence                                                                                                       |
|---------------------|-----------|------------|------------------|-----------------------------------------------------------------------------------------------------------------------------|
| si scramble control | Dharmacon | Smartpool  | D-001810-10-05   |                                                                                                                             |
| siSA1               | Dharmacon | Smartpool  | L-010638-01-0010 |                                                                                                                             |
| siSA2               | Dharmacon | Smartpool  | L-021351-00-0010 |                                                                                                                             |
| siNIPBL             | Dharmacon | Smartpool  | L-012980-00-0010 |                                                                                                                             |
| siAQR               | Dharmacon | Smartpool  | L-022214-01-0005 |                                                                                                                             |
| esi control         | Sigma     | Luciferase | EHUFLUC          |                                                                                                                             |
| esi SA1             | Sigma     | exon 31    | custom esiRNA    | TCCTCAGATGCAGATCTCTTGGTTAGGCC<br>AGCCGAAGTTAGAAGACTTAAATCGGAAG<br>GACAGAACAGGAATGAACTACATGAAAGTG<br>AGAAGTGGAGTGAGGCATGCTGT |
| esi SA2             | Sigma     | exon 32    | custom esiRNA    | CACGCAGGTAACATGGATGTTAGCTCAAAG<br>ACAACAAGAGGAAGCAAGGCAACAGCAGG<br>AGAGAGCAGCAATGAGCTATGTTAAACTG<br>CGAACTAATCTTCAGCATGCCAT |

1454

1455

1456

**Table 2. Antibodies used in this study.**

| Protein  | Company                | Catalogue No. | Species | Figure Reference                                    |
|----------|------------------------|---------------|---------|-----------------------------------------------------|
| SA1      | Abcam                  | ab4455        | mouse   | 1a, c, d, e, 2a, b, d,<br>3a, b, e, 4g, 5b, f, h, i |
| SA1      | Abcam                  | ab4457        | mouse   | 1i                                                  |
| SA2      | Bethyl                 | A300-159      | goat    | 1b, c, d, e, 2a, 3a, b,<br>f, 4g, e, 5c, g          |
| SA2      | Bethyl, AbVantage Pack | A310-941A     | goat    | 1i                                                  |
| CTCF     | Diagenode              | C15410210     | rabbit  | 1c, d, i, 2a                                        |
| CTCF     | Cell signalling        | 2899s         | rabbit  | 1a, e                                               |
| RAD21    | Abcam                  | ab992         | rabbit  | 1c, d, i, 2a, d, 4e,<br>g, j                        |
| GFP-TRAP | ChromoTek              | gtd-20        |         | 1i, 3g                                              |
| GFP      | Invitrogen             | A11122        | rabbit  | 1a, e                                               |
| mAID     | MBL                    | M214-3        | mouse   | S1a                                                 |
| OsTIR    | MBL                    | PD048         | rabbit  | S1a                                                 |
| SMC3     | Abcam                  | ab9263        | rabbit  | 1i                                                  |
| CHD6     | Bethyl                 | A301-221A     | rabbit  | 2a                                                  |
| MCM3     | Bethyl                 | A300-124A     | goat    | 2a, 5b                                              |
| HNRNPUL2 | Abcam                  | ab195338      | rabbit  | 2a                                                  |
| YTHDC1   | Abcam                  | ab122340      | rabbit  | 2d                                                  |
| FTSJ3    | Bethyl                 | A304-199A-M   | rabbit  | 2d                                                  |
| FANCI    | Bethyl                 | A301-254A-M   | rabbit  | 2d                                                  |
| TAF15    | Abcam                  | ab134916      | rabbit  | 2d                                                  |
| DHX9     | Abcam                  | Ab26271       | rabbit  | 2d, 5b                                              |
| SSRP1    | Abcam                  | ab26212       | mouse   | 2d                                                  |
| INO80    | Proteintech            | 18810-1-AP    | rabbit  | 2d                                                  |
| ESYT2    | Sigma-Aldrich          | HPA002132     | rabbit  | 2d                                                  |
| S9.6     | Kerafast               | ENH001        | mouse   | 5b-j                                                |
| RNASE H2 | Novus                  | NBP1-76981    | rabbit  | 5b                                                  |
| AQR      | Bethyl                 | A302-547A     | rabbit  | 5b, e                                               |
| POLR2    | Covance                | MMS-1289      | mouse   | 5b                                                  |
| MAU2     | Abcam                  | ab183033      | rabbit  | 4e, g, f                                            |
| NIPBL    | Abbiotec               | 250133        | rat     | 4e, g, f, S5                                        |
| H3       | Abcam                  | ab1791        | rabbit  | 3e, f, 4e, g, f                                     |

| Name (Secondary Abs) | Fluorophore | Company                                   | Catalogue No.              | Figure Reference |
|----------------------|-------------|-------------------------------------------|----------------------------|------------------|
| Donkey anti-Rabbit   | Cy3_AF647   | Home made from Jackson ImmunoResearch IgG | Home made from 711-005-152 | 1e, S1           |
| Donkey anti-Goat     | AF405_AF647 | Home made from Jackson ImmunoResearch IgG | Home made from 705-005-147 | 1e, S1           |
| Donkey anti-mouse    | AF647       | Invitrogen                                | A31570                     | 1a, d, e         |
| Donkey anti-rabbit   | AF488       | Invitrogen                                | A21206                     | 1a, d, e         |
| Donkey anti-rabbit   | AF647       | Invitrogen                                | A31573                     | 1a, d, e         |
| Donkey anti-goat     | AF555       | Invitrogen                                | A21432                     | 1a, d, e         |
| Donkey anti-goat     | AF647       | Invitrogen                                | A21447                     | 1a, d, e         |
| Goat anti-Mouse      | AF568       | ThermoFisher Scientific                   | A-11031                    |                  |
| Goat anti-Rabbit     | AF647       | ThermoFisher Scientific                   | A-21244                    |                  |
| Rabbit anti-Goat     | AF647       | ThermoFisher Scientific                   | A-21446                    |                  |

1457  
1458  
1459

**Table 3. Published datasets used in this study.**

| Accession no. | Analysis description                                  | Publication DOI or Ref     | Figure Reference |
|---------------|-------------------------------------------------------|----------------------------|------------------|
| GSE104334     | Long-range contact analysis of Hi-C datasets          | 10.1016/j.cell.2017.09.026 | 1i               |
| GSE89729      | Percent Spliced In (PSI) analysis of RNA-seq datasets | 10.1172/jci.insight.91419  | 4d, "HCT Zuo"    |
| GSM958749     | Percent Spliced In (PSI) analysis of RNA-seq datasets | ENCODE HCT116 RNAseq       | 4d, "HCT ENCODE" |
| GSM958735     | Percent Spliced In (PSI) analysis of RNA-seq datasets | ENCODE HeLa RNAseq         | 4d, "HeLa"       |

1460

1461 **Table 4. Published ChIP-seq datasets used for ChromHMM.**

| Protein                       | Accession  | Publication                  | Matched input          |
|-------------------------------|------------|------------------------------|------------------------|
| NIPBL (EtOH- and IAA-treated) | GSE104334  | (Rao <i>et al.</i> , 2017)   | -                      |
| CBX1                          | GSM1010758 | (Gertz <i>et al.</i> , 2013) |                        |
| EZH2                          | GSM3498250 | (Dunham <i>et al.</i> ,      | GSM2308475;GSM2308476  |
| POLR2A                        | GSM935426  | (Dunham <i>et al.</i> ,      | GSM2308422             |
| POLR2AphosphoS5               | GSM803474  | (Gertz <i>et al.</i> , 2013) | GSM803475              |
| SIN3A                         | GSM1010905 | (Gertz <i>et al.</i> , 2013) |                        |
| YY1                           | GSM803354  | (Gertz <i>et al.</i> , 2013) | GSM803475              |
| H3K4me1                       | GSM945858  |                              | GSM2308475; GSM2308476 |
| H3K4me1                       | GSM2527549 | (Dunham <i>et al.</i> ,      | GSM2308422             |
| H3K4me3                       | GSM2533929 | (Dunham <i>et al.</i> ,      | GSM2308475; GSM2308476 |
| H3K4me3                       | GSM945304  | (Thurman <i>et al.</i> ,     | GSM945287              |
| H3K9me3                       | GSM2527565 | (Dunham <i>et al.</i> ,      |                        |

|          |            |                         |            |
|----------|------------|-------------------------|------------|
| H3K9me3  | GSM2308431 | (Dunham <i>et al.</i> , |            |
| H3K27ac  | GSM2534277 | (Dunham <i>et al.</i> , | GSM2308422 |
| H3K27me3 | GSM2308612 | (Dunham <i>et al.</i> , |            |

1462

## Figure 1.

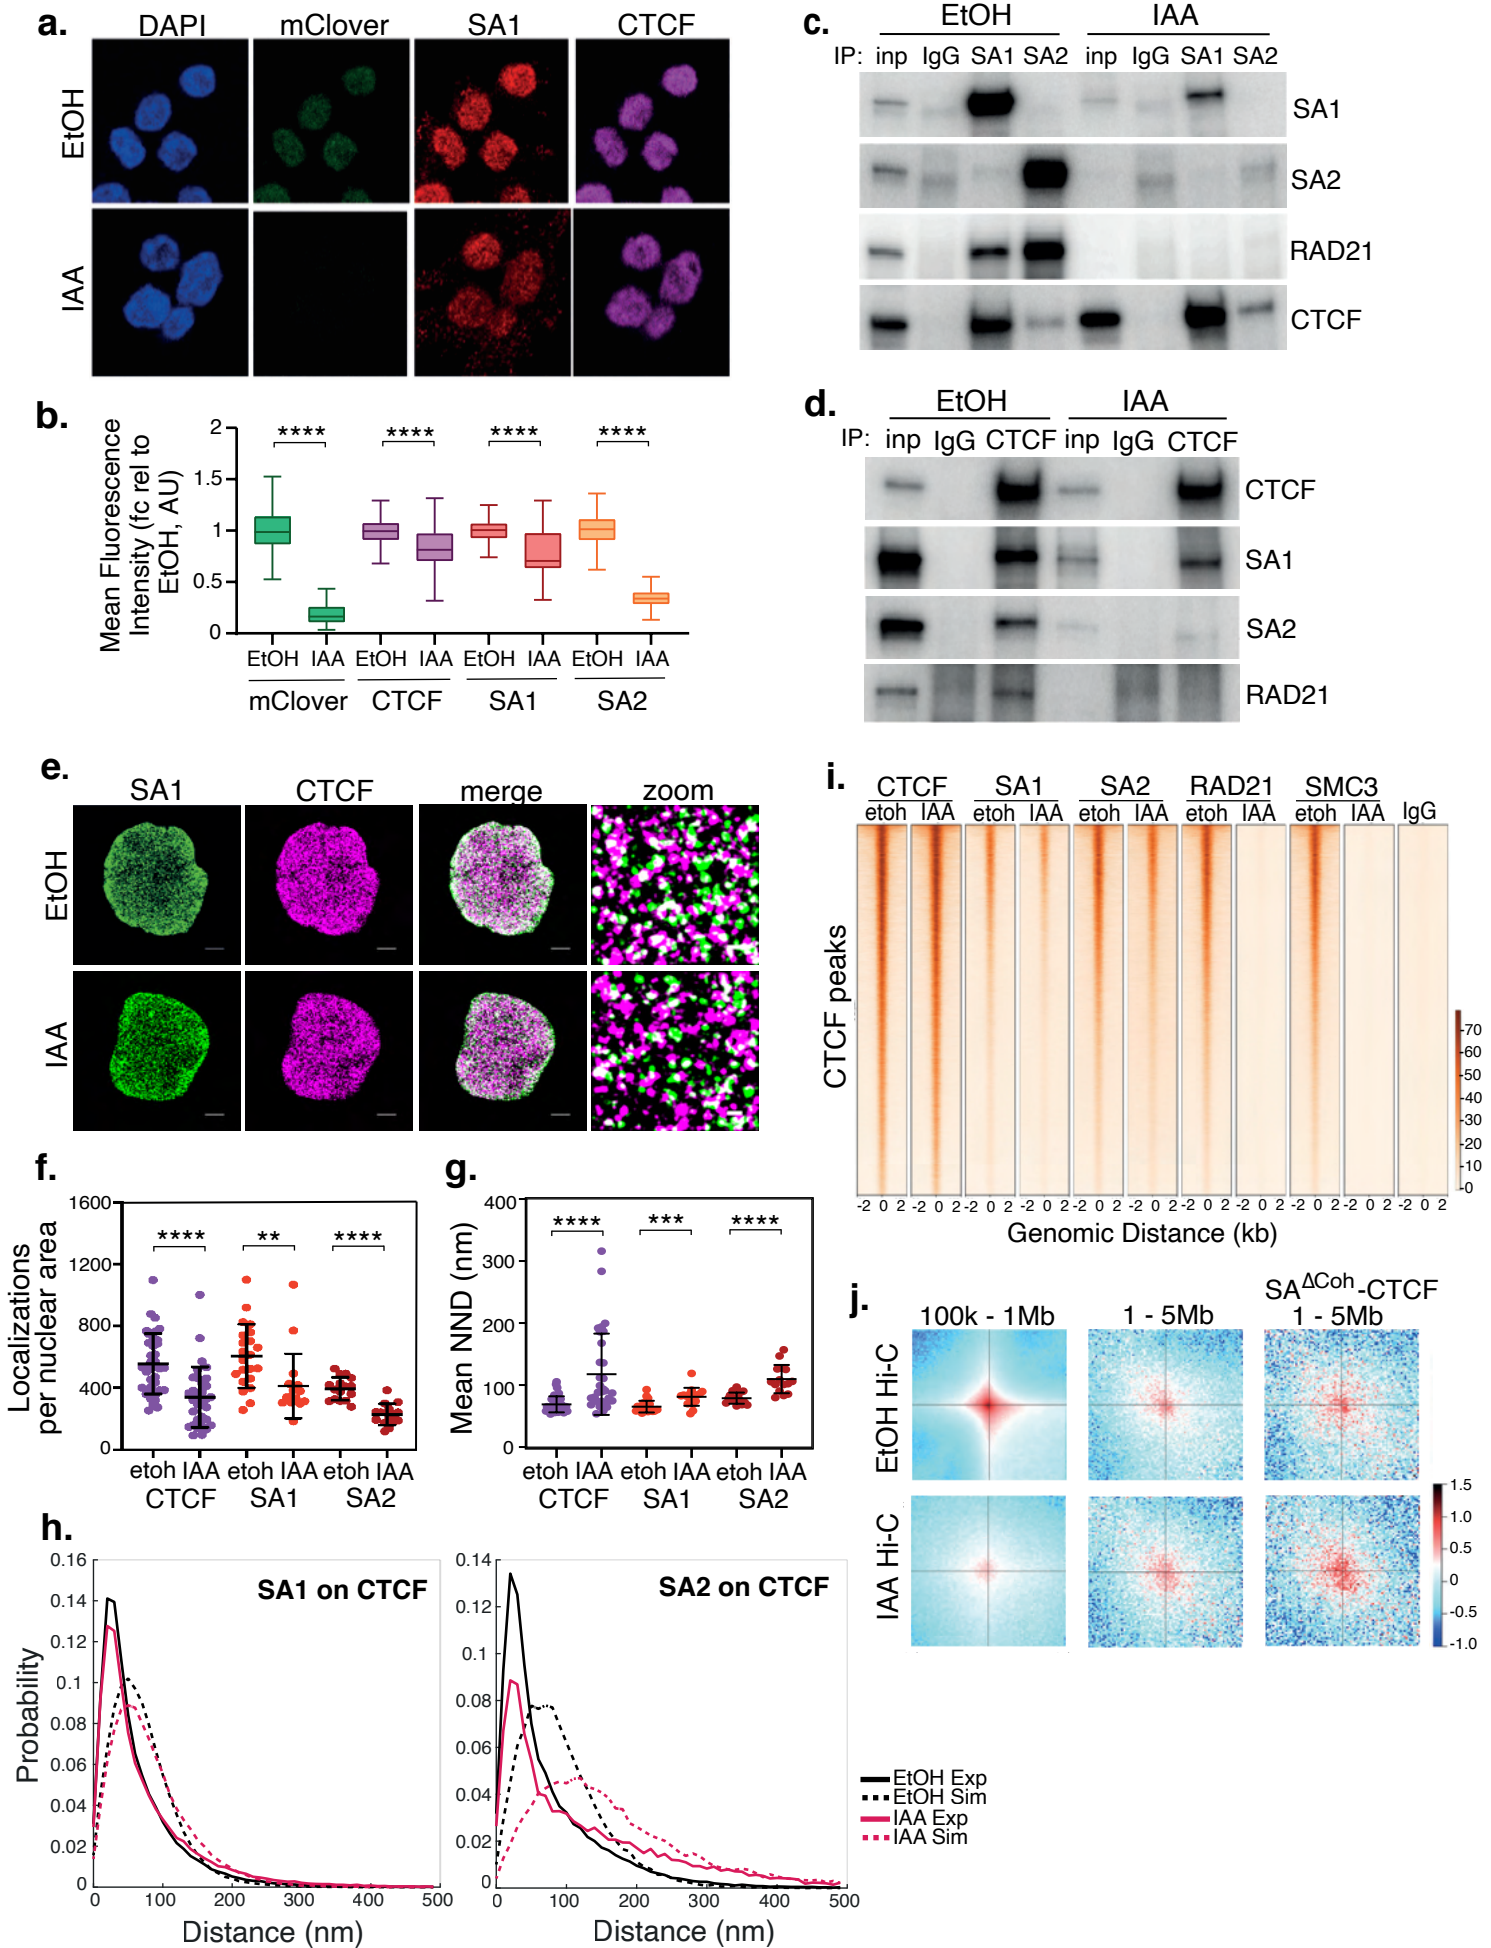

## Figure 2.

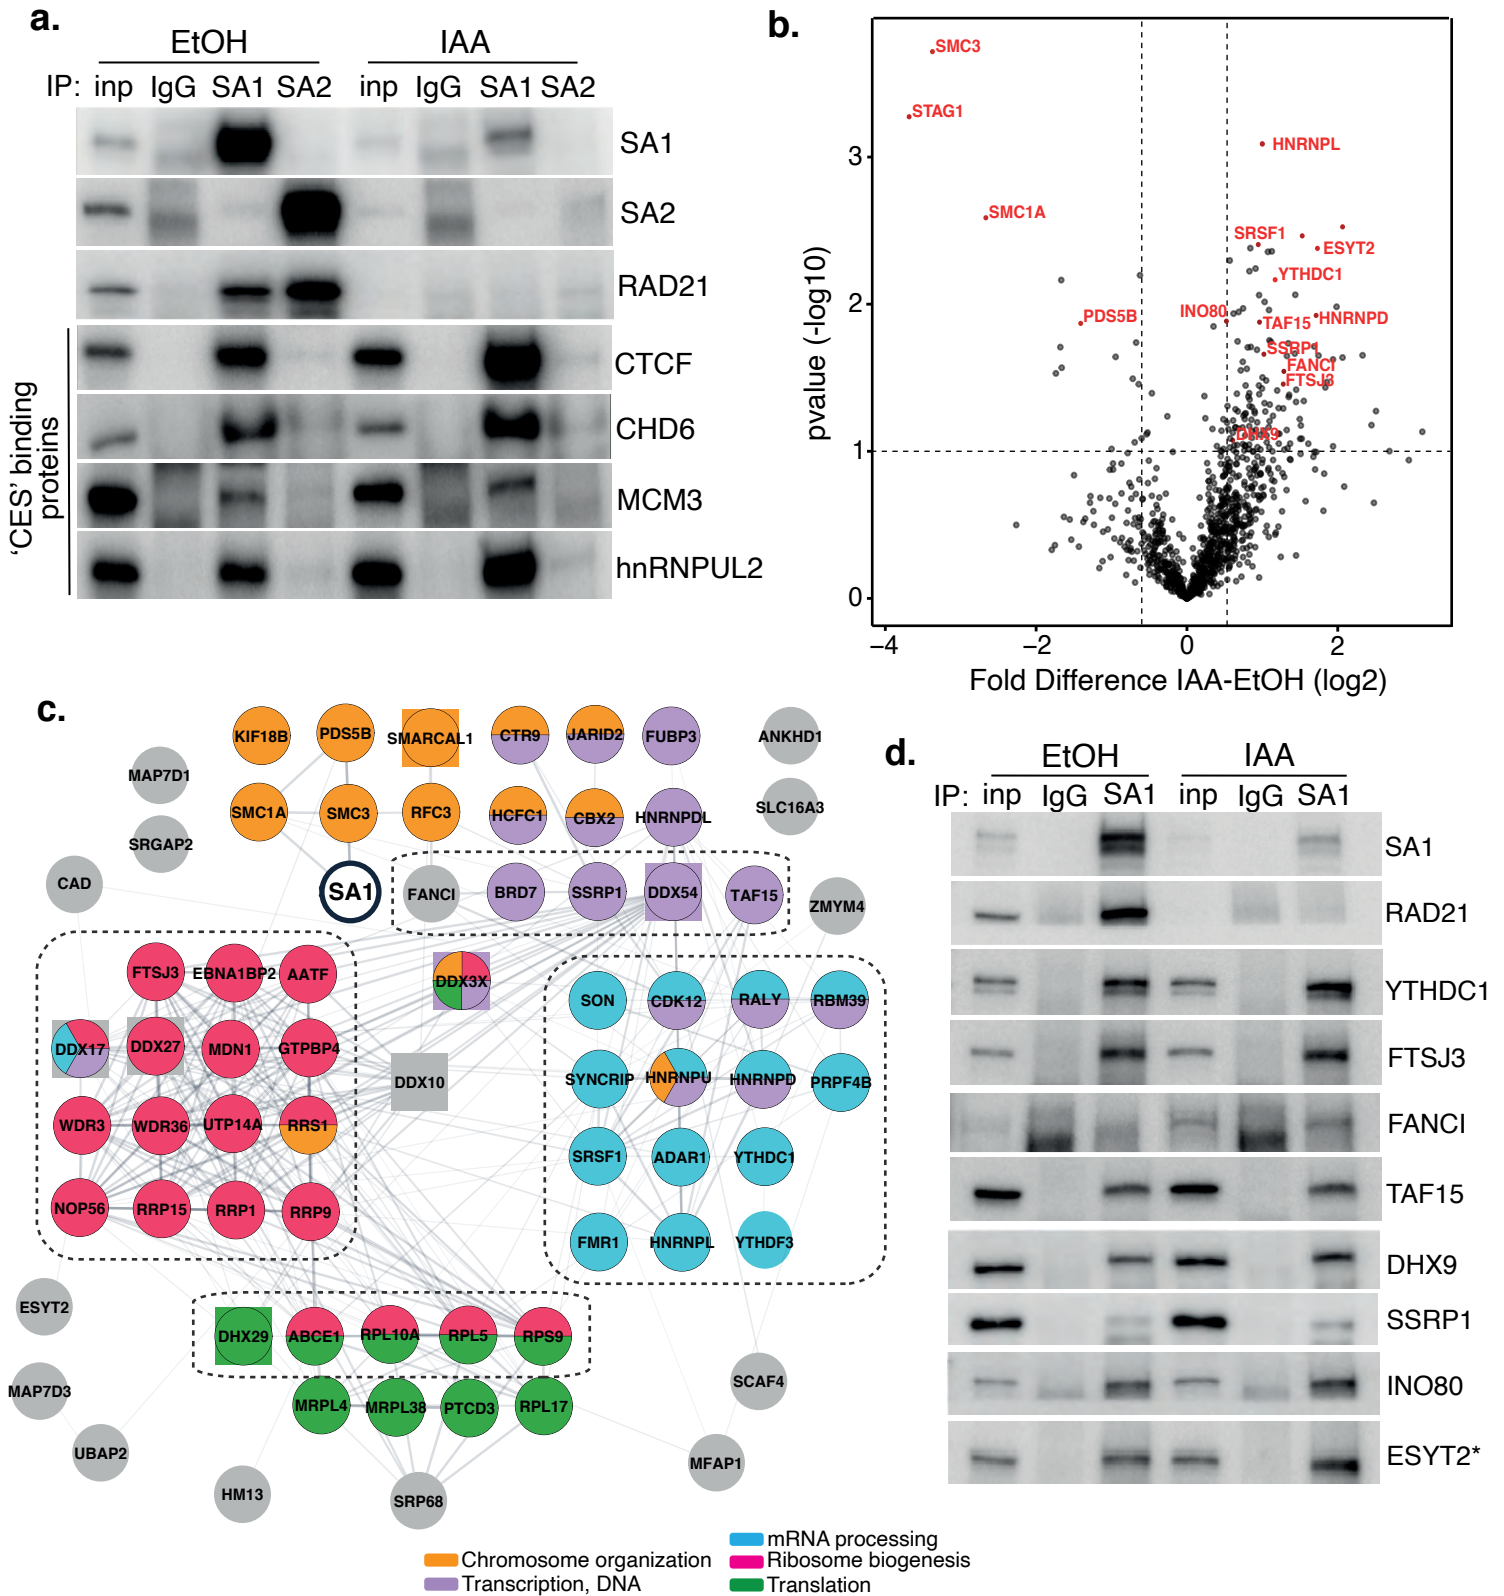

### Figure 3.

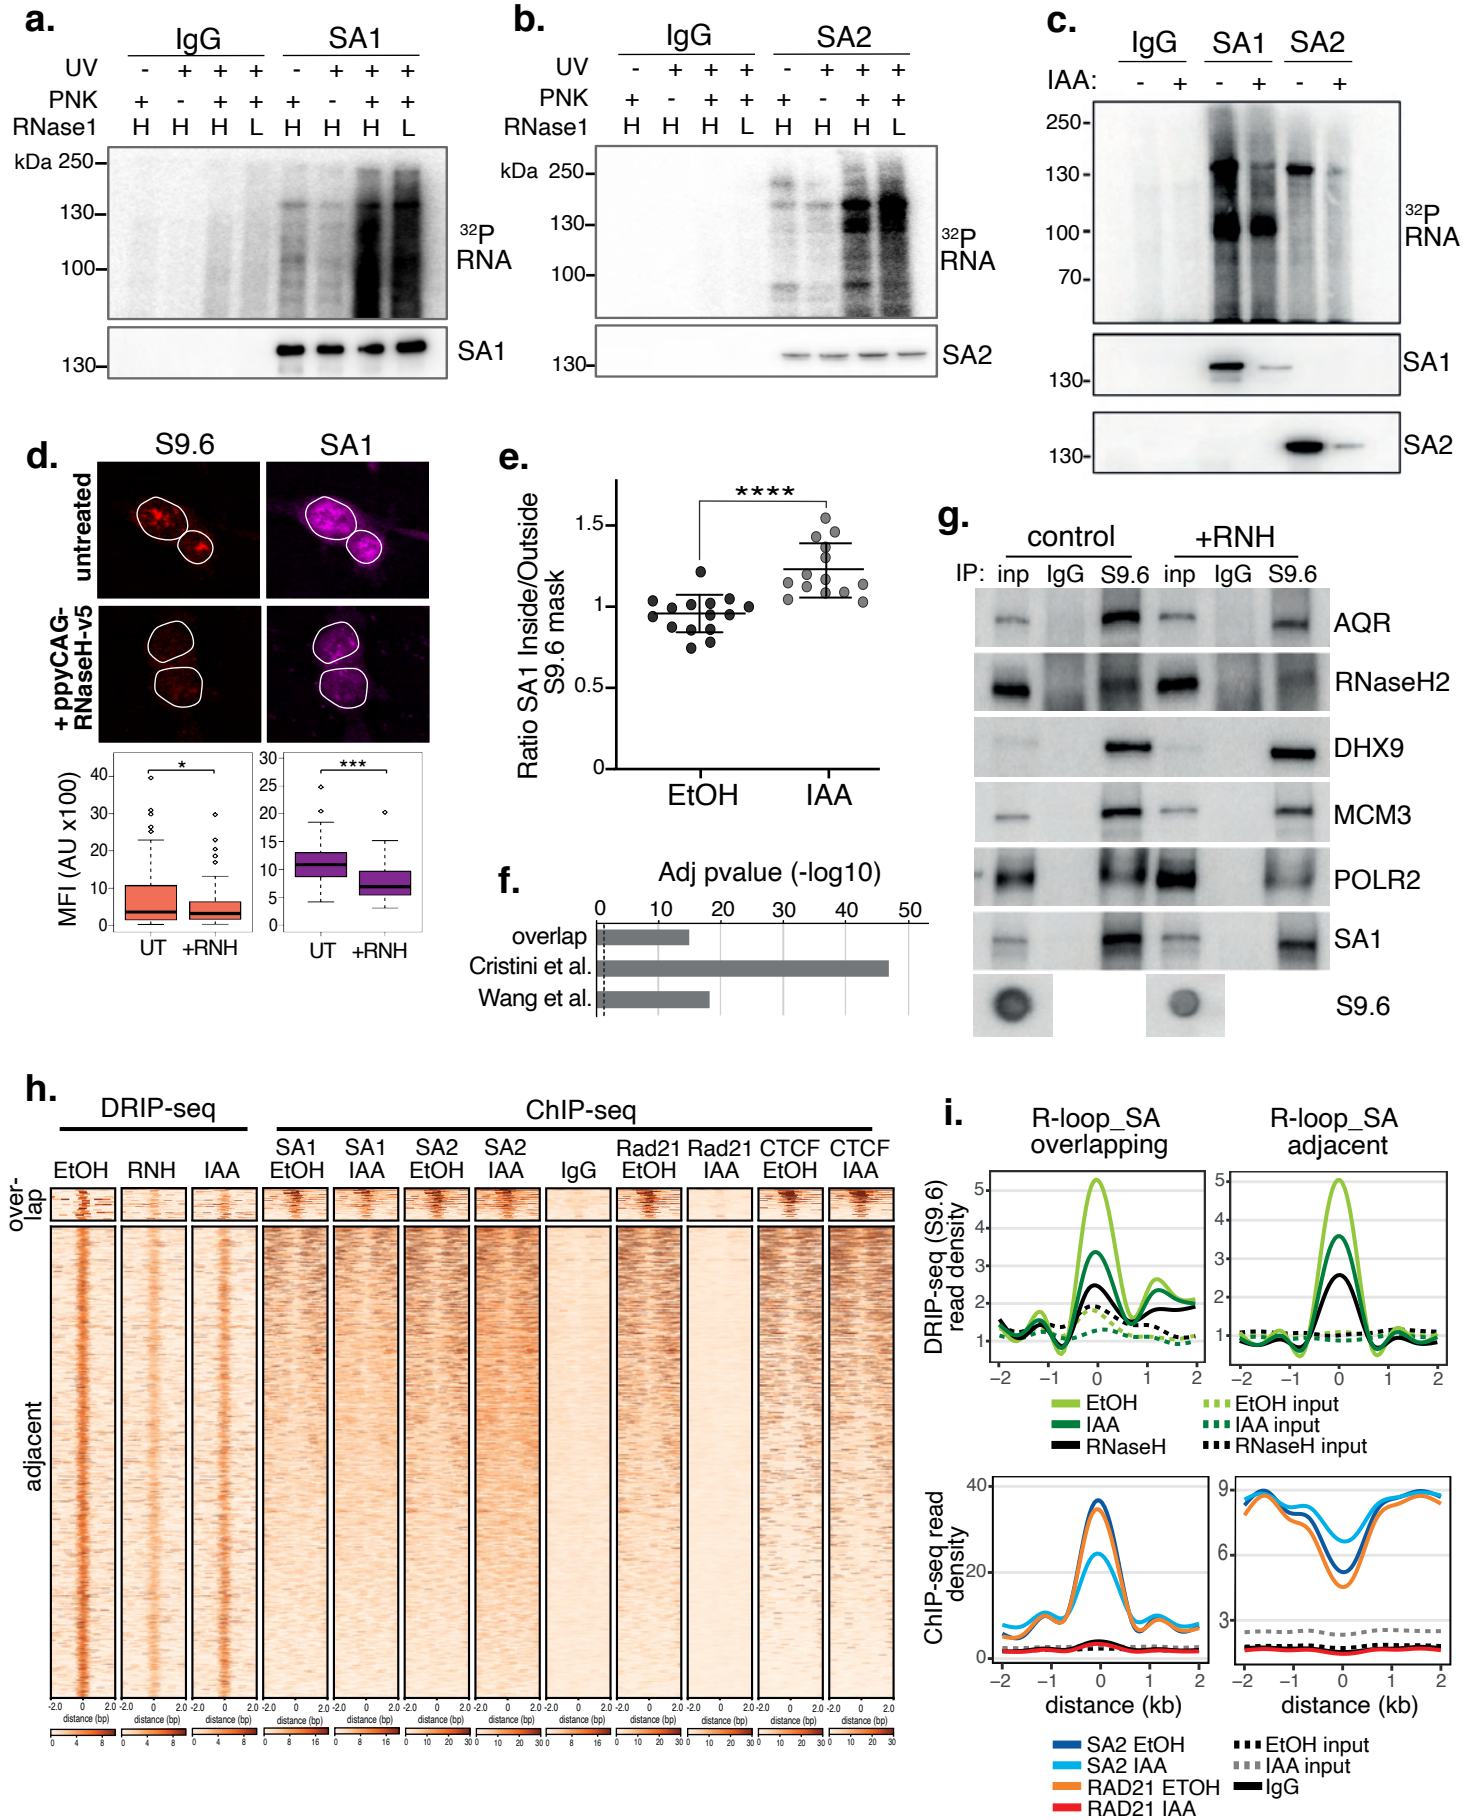



## Figure 4

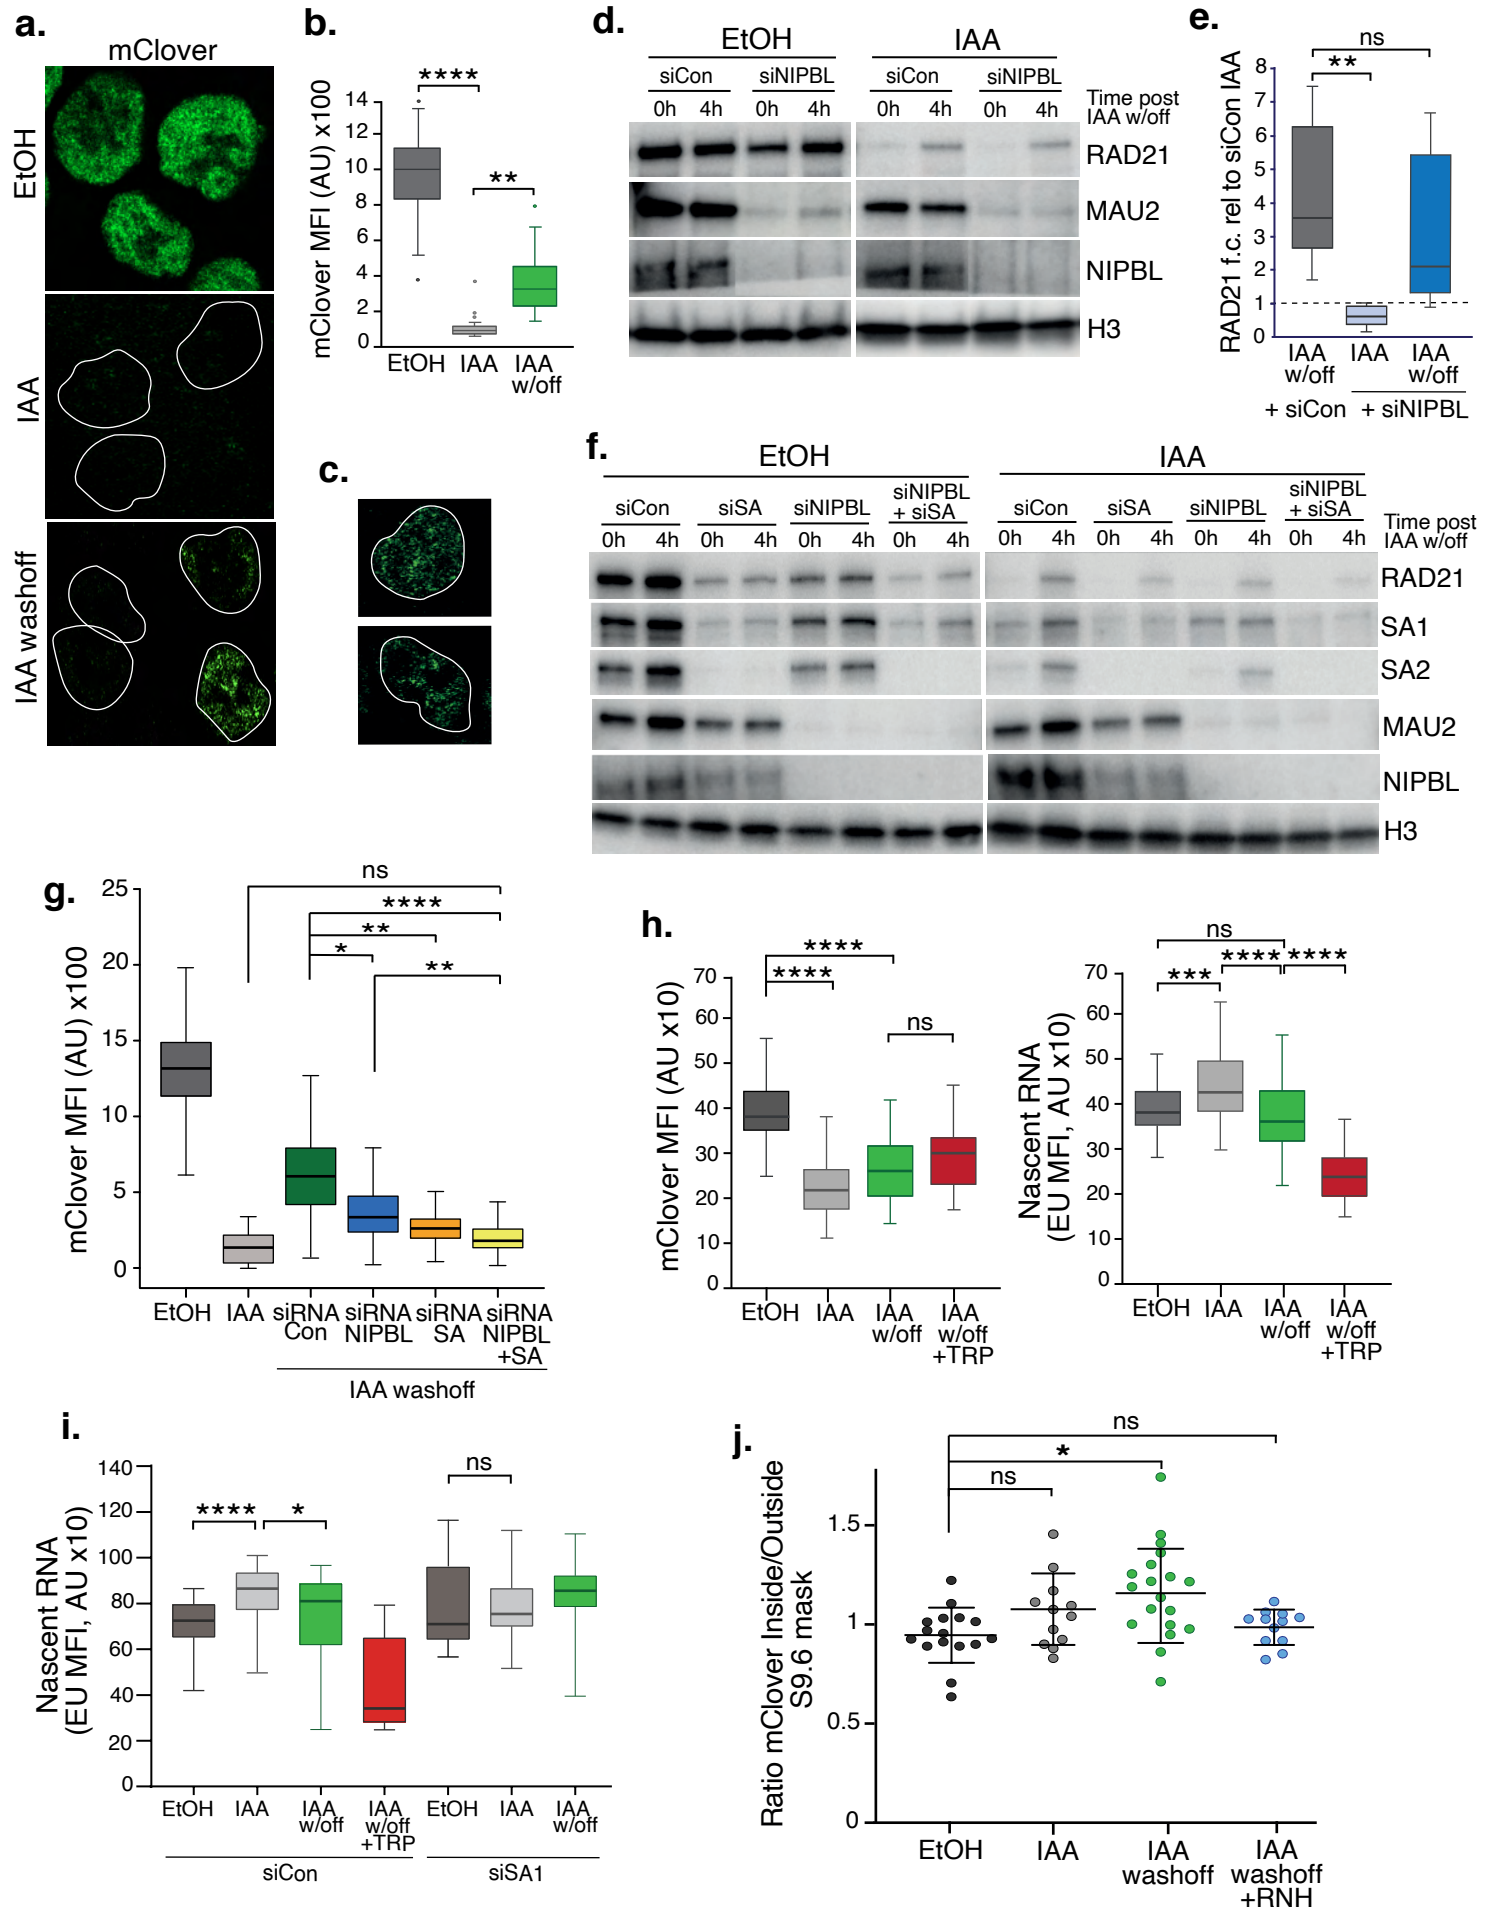

## Figure 5.

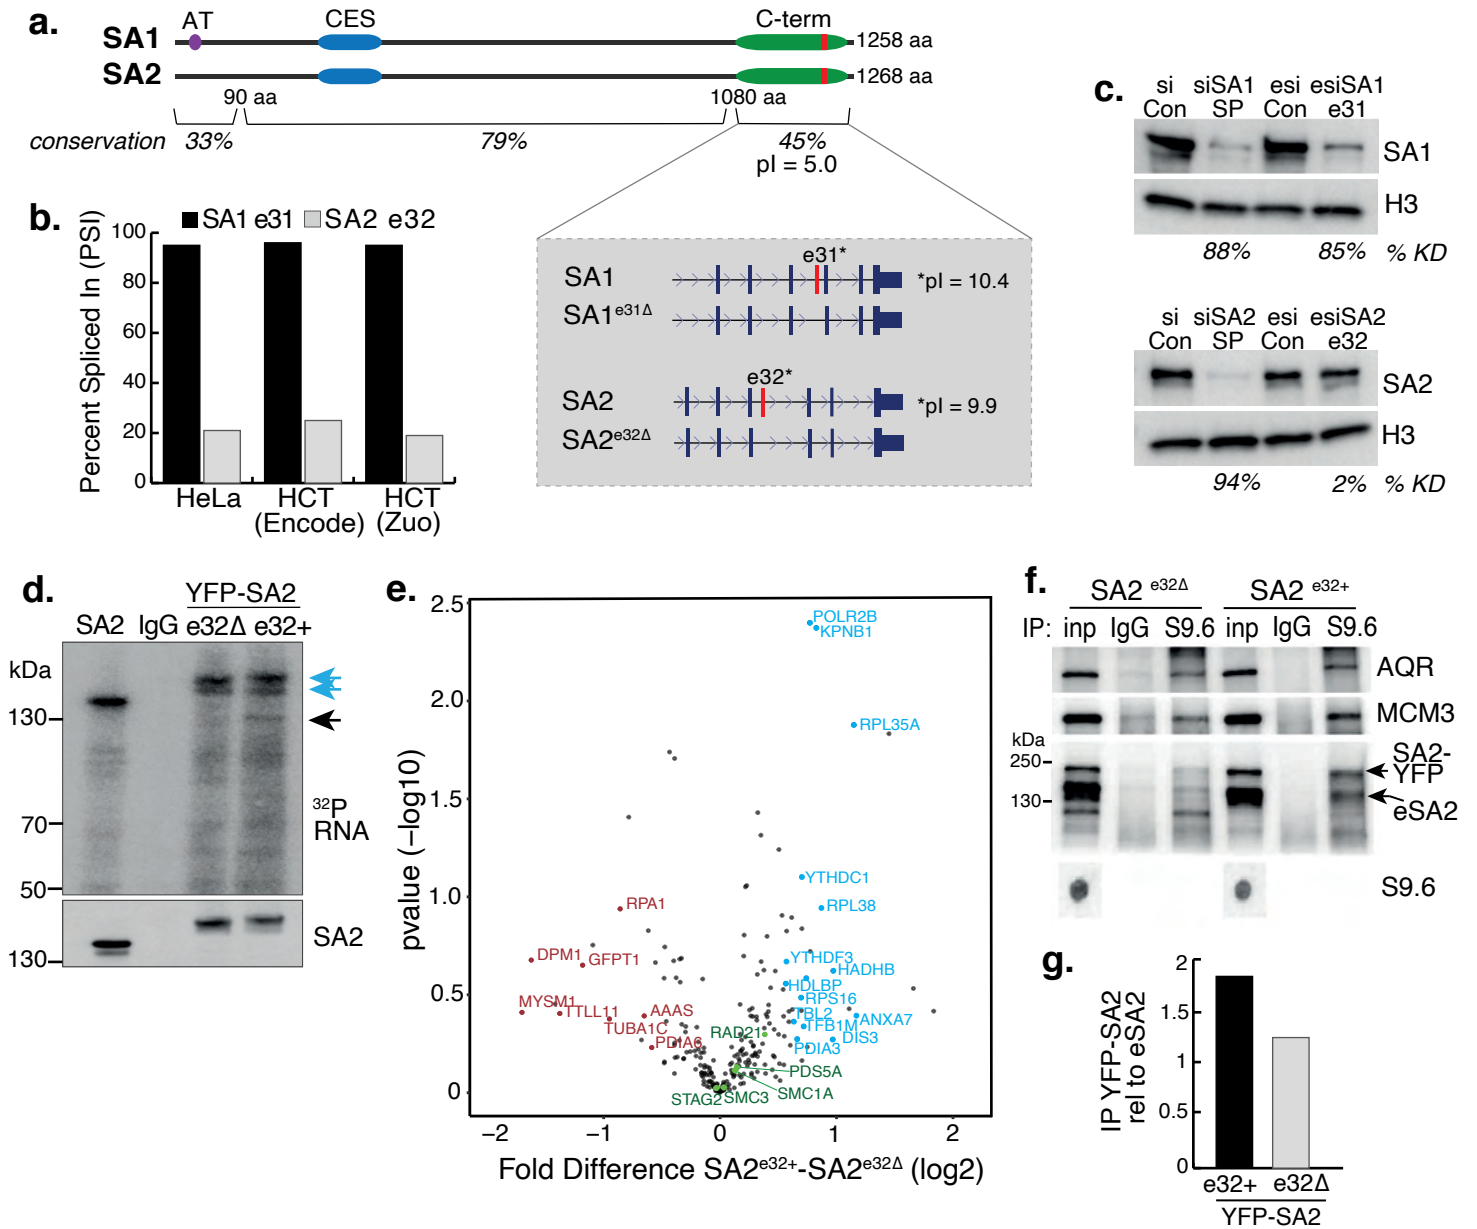

Source: https://www.biorxiv.org/content/10.1101/2021.02.20.432055v3.full.pdf
